# Supplementary material for: Thermoneutral synthesis of spiro-1,4-cyclohexadienes by visible-light-driven dearomatization of benzylmalonates
Source: Royal Society of Chemistry journal article supplement (doi:10.1039/d1gc04686a), 2022-01-01

# **Thermoneutral Synthesis of Spiro-1,4-cyclohexadienes by Visible-Light-Driven Dearomatization of Benzylmalonates**

Quan-Qing Zhao, Julia Rehbein, and Oliver Reiser\*

<sup>a</sup>Institut für Organische Chemie, Universität Regensburg, Universitätsstrasse 31, 93053 Germany.

\*E-mail: [oliver.reiser@chemie.uni-regensburg.de](mailto:oliver.reiser@chemie.uni-regensburg.de)

## Table of Contents

|                                                                               |    |
|-------------------------------------------------------------------------------|----|
| 1. General Information .....                                                  | 3  |
| 2. Synthesis of Starting Material .....                                       | 4  |
| 2.1 Synthesis of Benzylmalonates .....                                        | 4  |
| 2.2 Synthesis of Alkyne <b>2x</b> .....                                       | 4  |
| 3. Detailed Optimization of Reaction Conditions and Control Experiments ..... | 5  |
| 3.1 Optimization of Reaction Conditions .....                                 | 5  |
| 3.2 Control Experiments.....                                                  | 6  |
| 4. General Procedure and Spectral Data of Products.....                       | 7  |
| 4.1 General Procedure for Synthesis of <b>3</b> .....                         | 7  |
| 4.2 Spectral Data of Products .....                                           | 7  |
| 5. Preparative Utility of the Methodology .....                               | 13 |
| 5.1 Gram-Scale Reaction .....                                                 | 13 |
| 5.2 Synthetic Transformations of <b>3aa</b> .....                             | 14 |
| 6. Mechanistic Studies.....                                                   | 15 |
| 6.1 TEMPO Trapping Experiment .....                                           | 15 |
| 6.2 Allylic Sulfone Trapping Experiment .....                                 | 16 |
| 6.3 Light On-off Experiment.....                                              | 17 |
| 6.4 Quantum Yield Measurement.....                                            | 17 |
| 6.5 Luminescence Quenching Experiment.....                                    | 18 |
| 7. X-ray Structure of <b>3ad</b> .....                                        | 19 |
| 8. Computational Studies .....                                                | 19 |
| 9. References.....                                                            | 27 |
| 10. NMR Spectra .....                                                         | 28 |

## 1. General Information

Commercially available chemical materials were purchased in high quality and used without further purification. All photochemical reactions were carried out in oven-dried glassware applying three consecutive freeze-pump-thaw cycles. Reactions were monitored by thin-layer chromatography (TLC). Anhydrous solvents were prepared by established laboratory procedures.<sup>[1]</sup> DCM, EtOAc, n-pentane and hexanes (40-60 °C) for chromatography were distilled prior to use. The reported yields are referred to isolated compounds unless otherwise stated.

### Chromatography

Thin-layer chromatography (TLC) was performed with TLC precoated aluminum sheets (Merck) Silica gel 60 F254, 0.2 mm layer thickness and visualized by a dual short ( $\lambda = 254$  nm) / long ( $\lambda = 366$  nm) wavelength UV lamp. Staining was done with Seebach's Magic Stain (2.5 g phosphomolybdic acid, 1.0 g cerium(IV) sulfate tetrahydrate, 94.0 mL distilled water and 6.0 mL conc. sulfuric acid), vanillin (6.0 g vanillin, 100.0 mL ethanol (95%) and 1.0 mL conc. sulfuric acid) or potassium permanganate (1.0 g  $\text{KMnO}_4$ , 2.0 g  $\text{Na}_2\text{CO}_3$  and 100.0 mL distilled water) followed by heating. Column chromatography was performed with silica gel (Merck, 0.063-0.200 mm particle size) and flash silica gel (Merck, 0.040-0.063 mm particle size).

### NMR-Spectroscopy

$^1\text{H}$  NMR spectra were recorded on Bruker Avance 300 (300 MHz), Bruker Avance 400 (400 MHz) or Bruker Avance III 400 "Nanobay" (400 MHz) Chemical shifts for  $^1\text{H}$  NMR were reported as  $\delta$ , parts per million (ppm), relative to the signal of  $\text{CHCl}_3$  at 7.26 ppm. Spectra were evaluated in first order and coupling constants  $J$  are reported in Hertz (Hz). Splitting patterns for the spin multiplicity of the signals in the spectra are given as the following: s = singlet, bs = broad singlet, d = doublet, t = triplet, q = quartet, p = pentet, sex = sextet, hept = heptet, m = multiplet and combinations thereof. Chemical shifts for  $^1\text{H}$  NMR were reported as  $\delta$ , parts per million (ppm), relative to the signal of  $\text{CHCl}_3$  at 7.26 ppm.

$^{13}\text{C}$  NMR spectra were recorded on Bruker Avance 300 (75 MHz), Bruker Avance 400 (101 MHz) or Bruker Avance III 400 "Nanobay" (101 MHz) Spectrometer. Chemical shifts for  $^{13}\text{C}$  NMR were reported as  $\delta$ , parts per million (ppm), relative to the center line signal of the  $\text{CDCl}_3$  triplet at 77.0 ppm.

$^{19}\text{F}$  NMR spectra were recorded on Bruker Avance 300 (282 MHz), Bruker Avance 400 (376 MHz) or Bruker Avance III 400 "Nanobay" (376 MHz) Spectrometer.

### Mass Spectrometry

Mass spectra were recorded by the Central Analytic Department of the University of Regensburg using Jeol AccuTOF GCX and Agilent Q-TOF 6540 UHD Spectrometer. High-resolution mass spectra were measured using atmospheric pressure chemical ionization (APCI), electron ionization (EI) or electrospray ionization (ESI) with a quadrupole time-of-flight (Q-TOF) detector

### IR-Spectroscopy

FTIR spectroscopy was carried out on a Cary 630 FTIR Spectrometer. Solid and liquid compounds were measured neatly and the wave numbers are reported as  $\text{cm}^{-1}$ .

### Melting Point Apparatus

The measurement of melting points was carried out on a MPA100 - Automated melting point system by OptiMelt using a ramp rate of 1K/min.

## X-Ray Crystallography

X-ray crystallographic analysis was performed by the Central Analytic Department of the University of Regensburg using an Agilent Technologies SuperNova, an Agilent Technologies Gemini R Ultra, an Agilent GV 50 or a Rigaku GV 50 diffractometer. Suitable crystals were mounted on a Lindemann tube oil and kept at a steady temperature of  $T = 293$  K during data collection. The structures were solved with the ShelXT (Scheldrick 2015) structure solution program using the Intrinsic Phasing solution method and by using Olex2 as the graphical interface. The model was refined with ShelXL using Least Squares minimization

## 2. Synthesis of Starting Material

### 2.1 Synthesis of Benzylmalonates

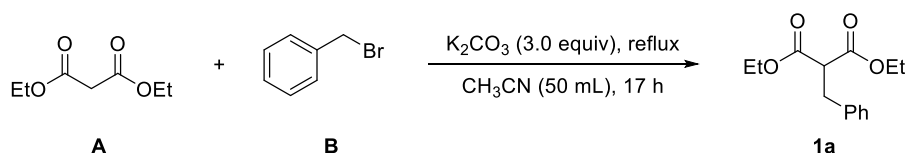

Compound **1a** was synthesized according to a literature procedure.<sup>[2]</sup> A mixture of diethyl malonate **A** (3.2 g, 20 mmol), benzylbromide **B** (3.76 g, 22 mmol), and  $K_2CO_3$  (8.29 g, 60 mmol) in  $CH_3CN$  (50 mL) was heated to reflux for 17 h. After cooling the solvent was evaporated and the residue was poured into 150 mL of distilled water. The aqueous solution was extracted with dichloromethane and the combined extracts were dried and evaporated. The residue was purified by column chromatography on silica (petroleum ether/ethylacetate 30:1~10:1) directly to give diethyl 2-benzylmalonate **1a** as a colorless liquid (3.2 g, 64% yield). Spectroscopic data are in agreement with those reported in literature.<sup>[2]</sup> Other benzylmalonates **1a-1f** were synthesized according to above procedure.

### 2.2 Synthesis of Alkyne **2x**

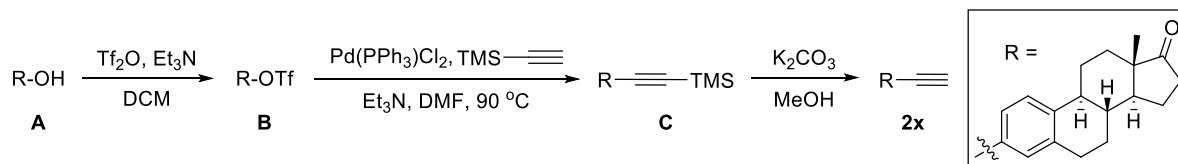

Compound **2x** was synthesized according to a literature procedure.<sup>[3]</sup> To a round bottom flask equipped with a magnetic stir bar was added estrone **A** (1.1 g, 4 mmol),  $Et_3N$  (1.6 mL, 12 mmol) and  $CH_2Cl_2$  (25 mL) at 0 °C. Trifluoromethanesulfonic anhydride (0.8 mL, 4.4 mmol) was added dropwise. The reaction mixture was stirred at 0 °C for 1 h and quenched with saturated aqueous  $NaHCO_3$  (20 mL). The organic layer was separated, and the aqueous phase was extracted with  $CH_2Cl_2$ . The combined organic layers were washed with brine (20 mL), dried over  $Na_2SO_4$ , and the volatiles were removed in vacuo. The residue was purified by flash column chromatography on silica to give product **B** (1.19 g, 74% yield).

A mixture of **B** (1.35 g, 3.4 mmol), ethynyltrimethylsilane (0.7 mL, 4.8 mmol), triethylamine (2.5 mL), and  $Pd(PPh_3)_2Cl_2$  (71 mg, 0.1 mmol) in 15 mL DMF was stirred at 90 °C for 4 h under nitrogen atmosphere. Then, the reaction mixture was diluted with water, extracted with petroleum ether/ether (1:1), washed with water until neutral, dried over  $Na_2SO_4$ , and concentrated under reduced pressure. The crude product was purified by flash chromatography on silica to give product **C** (0.57 g, 48% yield).



To product **C** (0.37 g, 1.1 mmol) a solution of K<sub>2</sub>CO<sub>3</sub> (0.23 g, 1.65 mmol) in MeOH (10 mL) was added and the mixture was stirred at room temperature until TLC analysis showed that **C** was completely consumed. The reaction mixture was filtered through a short plug of silica gel, concentrated, and purified by flash chromatography on silica to give **2x** (190 mg, 62% yield).

### 3. Detailed Optimization of Reaction Conditions and Control Experiments

#### 3.1 Optimization of Reaction Conditions

**Table S1.** Screening of the photocatalyst

| 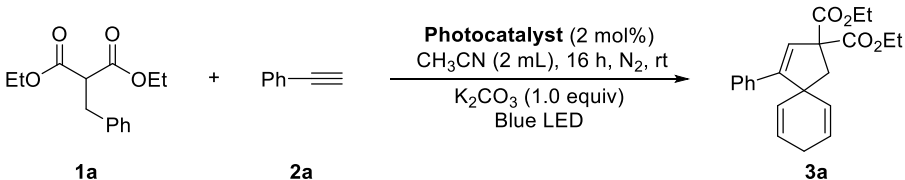 |                                                                |                          |
|------------------------------------------------------------------------------------|----------------------------------------------------------------|--------------------------|
| Entry <sup>[a]</sup>                                                               | Photocatalyst                                                  | Yield <sup>[b]</sup> (%) |
| 1                                                                                  | Eosin                                                          | N.D.                     |
| 2                                                                                  | Mes-Acr-MeBF <sub>4</sub>                                      | N.D.                     |
| 3                                                                                  | Riboflavin                                                     | N.D.                     |
| 4                                                                                  | 4CzIPN                                                         | N.D.                     |
| 5                                                                                  | Cu(dmp) <sub>2</sub> Cl <sub>2</sub>                           | N.D.                     |
| 6                                                                                  | Ru(bpy) <sub>3</sub> Cl·6H <sub>2</sub> O                      | N.D.                     |
| 7                                                                                  | Ir(dF(CF <sub>3</sub> )ppy) <sub>2</sub> dtbbpyPF <sub>6</sub> | N.D.                     |
| 8                                                                                  | Ir(ppy) <sub>2</sub> bpyPF <sub>6</sub>                        | 14                       |
| 9                                                                                  | Ir(ppy) <sub>2</sub> (dtbbpy)PF <sub>6</sub>                   | 54                       |

[a] Unless otherwise noted, reactions were carried out with **1a** (25.0 mg, 0.1 mmol), **2a** (20.4 mg, 0.2 mmol), photocatalyst (2 mol%), K<sub>2</sub>CO<sub>3</sub> (13.8 mg, 1.0 equiv.) in CH<sub>3</sub>CN (2.0 mL) at rt under blue LED irradiation. [b] NMR yield using 1,3,5-trimethoxybenzene as internal standard. N.D. implies that no desired product was detected.

As shown in Table S1, among all the photocatalysts tested, Ir(ppy)<sub>2</sub>(dtbbpy)PF<sub>6</sub> gave the best results in terms of yield (54% yield) and thus was selected for further optimization studies.

**Table S2.** Screening of the solvent

| 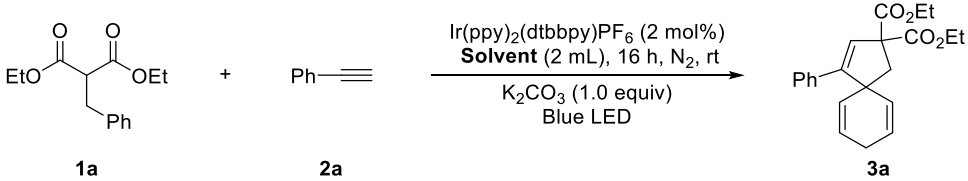 |                   |                          |
|--------------------------------------------------------------------------------------|-------------------|--------------------------|
| Entry <sup>[a]</sup>                                                                 | Solvent           | Yield <sup>[b]</sup> (%) |
| 1                                                                                    | CHCl <sub>3</sub> | N.D.                     |
| 2                                                                                    | THF               | N.D.                     |
| 3                                                                                    | DCM               | N.D.                     |
| 4                                                                                    | Toluene           | N.D.                     |

|   |                    |    |
|---|--------------------|----|
| 5 | DMF                | 28 |
| 6 | DMSO               | 50 |
| 7 | CH <sub>3</sub> CN | 54 |

[a] Unless otherwise noted, reactions were carried out with **1a** (25.0 mg, 0.1 mmol), **2a** (20.4 mg, 0.2 mmol), Ir(ppy)<sub>2</sub>(dtbbpy)PF<sub>6</sub> (2 mol%), K<sub>2</sub>CO<sub>3</sub> (13.8 mg, 1.0 equiv.) in solvent (2.0 mL) at rt under blue LED irradiation. [b] NMR yield using 1,3,5-trimethoxybenzene as internal standard. N.D. implies that no desired product was detected.

As shown in Table S2, among all the solvents tested, CH<sub>3</sub>CN gave the best results in terms of yield (54% yield) and thus was selected for further optimization studies.

**Table S3. Screening of the base**

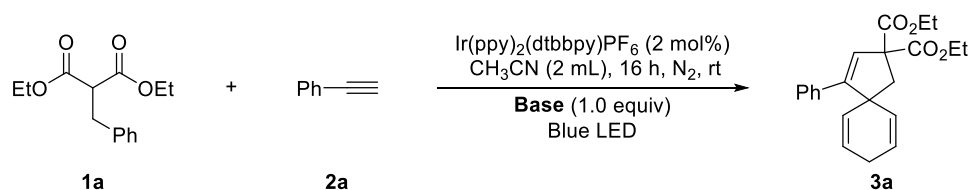

| Entry <sup>[a]</sup> | Base                            | Yield <sup>[b]</sup> (%) |
|----------------------|---------------------------------|--------------------------|
| 1                    | K <sub>2</sub> HPO <sub>4</sub> | N.D.                     |
| 2                    | Na <sub>2</sub> CO <sub>3</sub> | N.D.                     |
| 3                    | K <sub>2</sub> CO <sub>3</sub>  | 54                       |
| 4                    | Cs <sub>2</sub> CO <sub>3</sub> | 53                       |
| 5                    | K <sub>3</sub> PO <sub>4</sub>  | 69                       |
| 6                    | KOH                             | 14                       |
| 7                    | Quinuclidine                    | 15                       |
| 8 <sup>[c]</sup>     | K <sub>3</sub> PO <sub>4</sub>  | 89                       |
| 9 <sup>[d]</sup>     | K <sub>3</sub> PO <sub>4</sub>  | 99(96 <sup>[e]</sup> )   |
| 10 <sup>[d,f]</sup>  | K <sub>3</sub> PO <sub>4</sub>  | 78                       |
| 11 <sup>[d,g]</sup>  | K <sub>3</sub> PO <sub>4</sub>  | 74                       |

[a] Unless otherwise noted, reactions were carried out with **1a** (25.0 mg, 0.1 mmol), **2a** (20.4 mg, 0.2 mmol), Ir(ppy)<sub>2</sub>(dtbbpy)PF<sub>6</sub> (2 mol%), Base (1.0 equiv.) in CH<sub>3</sub>CN (2.0 mL) at rt under blue LED irradiation. [b] NMR yield using 1,3,5-trimethoxybenzene as internal standard. N.D. implies that no desired product was detected. [c] 24 h. [d] A flame-dried reactor was used and each component was added under the protection of N<sub>2</sub> gas, 24 h. [e] Isolated yield. [f] K<sub>3</sub>PO<sub>4</sub> (0.8 equiv.). [g] K<sub>3</sub>PO<sub>4</sub> (0.5 equiv.).

As shown in Table S3, among the bases tested, K<sub>3</sub>PO<sub>4</sub> gave the best results and the reaction conditions of entry 9 (99% NMR yield and 96% isolated yield) was thus selected for further studies.

## 3.2 Control Experiments

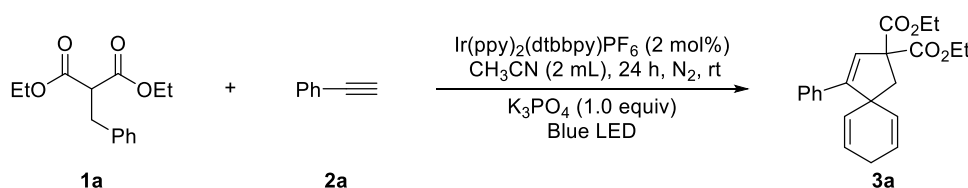

**Table S4. Control experiments**

| Entry <sup>[a]</sup> | hν | [Ir] | base | Yield <sup>[b]</sup> [%] |
|----------------------|----|------|------|--------------------------|
| 1 <sup>[c]</sup>     | -  | +    | +    | N.D.                     |
| 2 <sup>[d]</sup>     | +  | -    | +    | N.D.                     |
| 3 <sup>[e]</sup>     | +  | +    | -    | N.D.                     |
| 4                    | +  | +    | +    | 99                       |

[a] Unless otherwise noted, reactions were carried out with **1a** (25.0 mg, 0.1 mmol), **2a** (20.4 mg, 0.2 mmol), Ir(ppy)<sub>2</sub>(dtbbpy)PF<sub>6</sub> (2 mol%), K<sub>3</sub>PO<sub>4</sub> (1.0 equiv.) in CH<sub>3</sub>CN (2.0 mL) at rt under blue LED irradiation. [b] NMR yield using 1,3,5-trimethoxybenzene as internal standard. N.D. implies that no desired product was detected. [c] Without hv. [d] Without [Ir]. [e] Without base.

The results of Table S4 revealed that each component of visible light, photocatalyst and base is essential for this protocol.

## 4. General Procedure and Spectral Data of Products

### 4.1 General Procedure for Synthesis of 3

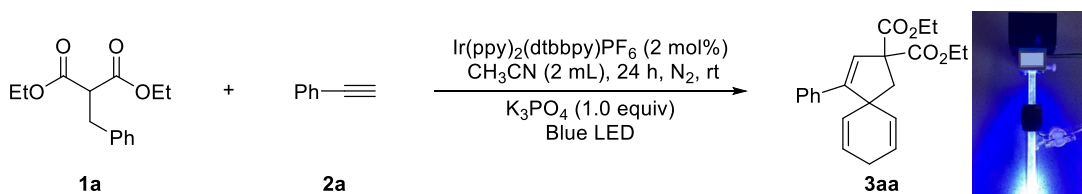

**1a** (25.0 mg, 0.1 mmol), **2a** (20.4 mg, 0.2 mmol), Ir(ppy)<sub>2</sub>dtbbpyPF<sub>6</sub> (1.8 mg, 2 mol%), K<sub>3</sub>PO<sub>4</sub> (21.2 mg, 1.0 equiv) and anhydrous CH<sub>3</sub>CN (2 mL) were added to a flame-dried Schlenk tube under nitrogen atmosphere. Then, the reaction mixture was degassed three times via the ‘freeze-pump-thaw’ procedure under nitrogen atmosphere. The reaction mixture was irradiated (blue LEDs, 455 nm) at room temperature for 24 h upon which the reaction was completed as monitored by TLC analysis. Concentration and purification of the crude by flash chromatography on silica (petroleum ether/ethylacetate 100:1~20:1) gave rise to the desired product **3aa** (33.8 mg, 96% yield) as a yellow liquid.

### 4.2 Spectral Data of Products

#### diethyl 4-phenylspiro[4.5]deca-3,6,9-triene-2,2-dicarboxylate **3aa**

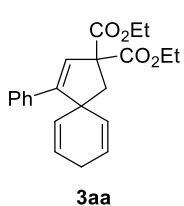

33.8 mg, yellow liquid, yield: 96%. <sup>1</sup>H NMR (300 MHz, CDCl<sub>3</sub>) δ (ppm) 7.48 – 7.45 (m, 2H), 7.19 – 7.18 (m, 1H), 7.17 (d, *J* = 2.0 Hz, 2H), 6.05 (s, 1H), 5.72 (dt, *J* = 10.3, 3.2 Hz, 2H), 5.60 (dt, *J* = 10.3, 1.8 Hz, 2H), 4.20 – 4.12 (m, 4H), 2.65 – 2.60 (m, 2H), 2.55 (s, 2H), 1.20 (t, *J* = 7.1 Hz, 6H). <sup>13</sup>C NMR (75 MHz, CDCl<sub>3</sub>) δ (ppm) 171.2, 151.4, 135.4, 132.4, 127.9, 127.8, 127.2, 124.7, 123.9, 64.2, 61.7, 51.3, 48.4, 25.8, 14.1. HRMS (EI<sup>+</sup>, 70 eV): calcd for C<sub>22</sub>H<sub>24</sub>O<sub>4</sub> [M<sup>+</sup>] 352.1669, found: 352.1677. IR (neat): 2982, 1726, 1659, 1446, 1372, 1230, 1178, 1088, 1025, 849, 760, 697 cm<sup>-1</sup>.

#### dimethyl 4-phenylspiro[4.5]deca-3,6,9-triene-2,2-dicarboxylate **3ba**

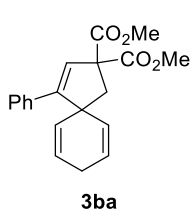

30.8 mg, colorless liquid, yield: 95%. <sup>1</sup>H NMR (300 MHz, CDCl<sub>3</sub>) δ (ppm) 7.53 – 7.52 (m, 1H), 7.51 – 7.49 (m, 1H), 7.24 (dd, *J* = 5.2, 1.9 Hz, 3H), 6.10 (s, 1H), 5.78 (dt, *J* = 10.3, 3.3 Hz, 2H), 5.64 (dt, *J* = 10.3, 1.9 Hz, 2H), 3.76 (s, 6H), 2.71 – 2.66 (m, 2H), 2.62 (s, 2H). <sup>13</sup>C NMR (75 MHz, CDCl<sub>3</sub>) δ (ppm) 171.6, 151.6, 135.2, 132.2, 127.92, 127.87, 127.2, 124.4, 124.0, 63.9, 52.9, 51.3, 48.5, 25.8. HRMS (EI<sup>+</sup>, 70 eV): calcd for C<sub>20</sub>H<sub>20</sub>O<sub>4</sub> [M<sup>+</sup>] 324.1356, found: 324.1353. IR (neat): 2952, 1730, 1435, 1282, 1230, 1197, 1092, 1028, 850, 768, 731, 697 cm<sup>-1</sup>.

### diethyl 7-chloro-4-phenylspiro[4.5]deca-3,6,9-triene-2,2-dicarboxylate **3ca**

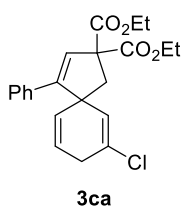

37.9 mg, yellow liquid, yield: 98%.  $^1\text{H}$  NMR (300 MHz,  $\text{CDCl}_3$ )  $\delta$  (ppm) 7.38 – 7.35 (m, 2H), 7.22 – 7.18 (m, 3H), 6.06 (s, 1H), 5.77 – 5.75 (m, 1H), 5.66 – 5.54 (m, 2H), 4.20 – 4.12 (m, 4H), 2.89 – 2.86 (m, 2H), 2.58 (d,  $J = 0.8$  Hz, 2H), 1.21 (td,  $J = 7.1, 2.4$  Hz, 6H).  $^{13}\text{C}$  NMR (100 MHz,  $\text{CDCl}_3$ )  $\delta$  (ppm) 170.9, 170.8, 150.5, 134.9, 131.7, 129.6, 129.5, 128.1, 128.05, 127.1, 125.6, 122.6, 64.2, 61.84, 61.80, 54.7, 47.5, 33.1, 14.0. HRMS (EI+, 70 eV): calcd for  $\text{C}_{22}\text{H}_{23}\text{O}_4\text{Cl}$  [ $\text{M}^+$ ] 386.1279, found: 386.1269. IR (neat): 2982, 1730, 1446, 1282, 1230, 1185, 1137, 1092, 854, 730, 693  $\text{cm}^{-1}$ .

### diethyl 7-methyl-4-phenylspiro[4.5]deca-3,6,9-triene-2,2-dicarboxylate **3da**

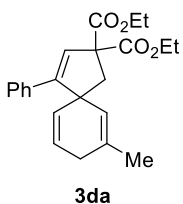

31.7 mg, colorless liquid, yield: 87%.  $^1\text{H}$  NMR (300 MHz,  $\text{CDCl}_3$ )  $\delta$  (ppm) 7.49 – 7.46 (m, 2H), 7.24 (dd,  $J = 5.1, 1.8$  Hz, 3H), 6.10 (s, 1H), 5.77 (dt,  $J = 9.9, 3.3$  Hz, 1H), 5.67 – 5.63 (m, 1H), 5.37 (s, 1H), 4.27 – 4.18 (m, 4H), 2.59 (s, 4H), 1.70 (s, 3H), 1.28 (td,  $J = 7.1, 2.1$  Hz, 6H).  $^{13}\text{C}$  NMR (75 MHz,  $\text{CDCl}_3$ )  $\delta$  (ppm) 171.32, 171.30, 151.7, 135.5, 132.2, 131.0, 127.9, 127.7, 127.2, 127.0, 124.5, 123.7, 64.2, 61.6, 52.6, 48.3, 30.7, 23.2, 14.1. HRMS (EI+, 70 eV): calcd for  $\text{C}_{23}\text{H}_{26}\text{O}_4$  [ $\text{M}^+$ ] 366.1826, found: 366.1819. IR (neat): 2982, 1733, 1446, 1282, 1244, 1185, 1137, 1092, 857, 764,

697  $\text{cm}^{-1}$ .

### ethyl 2-butyryl-4-phenylspiro[4.5]deca-3,6,9-triene-2-carboxylate **3ea**

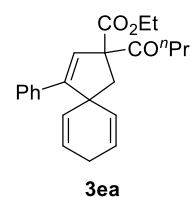

23.3 mg, colorless liquid, yield: 66%.  $^1\text{H}$  NMR (300 MHz,  $\text{CDCl}_3$ )  $\delta$  (ppm) 7.47 – 7.44 (m, 2H), 7.18 (dd,  $J = 5.0, 2.0$  Hz, 3H), 6.10 (s, 1H), 5.74 – 5.68 (m, 2H), 5.58 (dq,  $J = 9.8, 1.9$  Hz, 1H), 5.47 (dq,  $J = 10.4, 1.9$  Hz, 1H), 4.20 – 4.09 (m, 2H), 2.65 – 2.60 (m, 2H), 2.57 – 2.41 (m, 4H), 1.64 – 1.59 (m, 1H), 1.54 – 1.51 (m, 1H), 1.20 (t,  $J = 7.1$  Hz, 3H), 0.84 (t,  $J = 7.4$  Hz, 3H).  $^{13}\text{C}$  NMR (75 MHz,  $\text{CDCl}_3$ )  $\delta$  (ppm) 205.8, 171.6, 151.7, 135.4, 132.4, 132.1, 128.0, 127.9, 127.1, 124.7, 124.0, 123.8, 70.8, 61.7, 51.2, 47.2, 41.0, 25.8, 17.2, 14.1, 13.6. HRMS: (EI-MS)  $m/z$  calcd for  $\text{C}_{23}\text{H}_{27}\text{O}_3$

[ $\text{M}+\text{H}$ ] $^+$ : 351.1955, found: 351.1955. IR (neat): 2981, 1730, 1446, 1282, 1230, 1185, 1136, 1095, 1043, 857, 767, 693  $\text{cm}^{-1}$ .

### methyl 2-acetyl-4-phenylspiro[4.5]deca-3,6,9-triene-2-carboxylate **3fa**

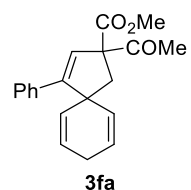

17.8 mg, colorless liquid, yield: 55%.  $^1\text{H}$  NMR (300 MHz,  $\text{CDCl}_3$ )  $\delta$  (ppm) 7.53 – 7.50 (m, 2H), 7.27 – 7.24 (m, 3H), 6.16 (s, 1H), 5.81 – 5.76 (m, 2H), 5.64 (dq,  $J = 9.9, 1.9$  Hz, 1H), 5.54 (dq,  $J = 10.4, 1.9$  Hz, 1H), 3.77 (s, 3H), 2.72 – 2.67 (m, 2H), 2.66 – 2.48 (m, 2H), 2.26 (s, 3H).  $^{13}\text{C}$  NMR (75 MHz,  $\text{CDCl}_3$ )  $\delta$  (ppm) 203.6, 172.0, 152.0, 135.3, 132.2, 132.0, 127.97, 127.95, 127.1, 124.4, 124.2, 124.0, 70.9, 52.9, 51.3, 47.2, 26.7, 25.8. HRMS (EI+, 70 eV): calcd for  $\text{C}_{20}\text{H}_{20}\text{O}_3$  [ $\text{M}^+$ ] 308.1407, found: 308.1419. IR (neat): 3026, 2952, 1714, 1435, 1357, 1226, 1115, 943, 842, 767, 723, 697  $\text{cm}^{-1}$ .

### diethyl 4-(p-tolyl)spiro[4.5]deca-3,6,9-triene-2,2-dicarboxylate **3ab**

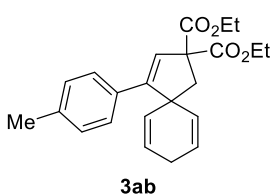

34.5 mg, colorless liquid, yield: 94%.  $^1\text{H}$  NMR (400 MHz,  $\text{CDCl}_3$ )  $\delta$  (ppm) 7.44 (d,  $J = 8.2$  Hz, 2H), 7.07 (d,  $J = 8.0$  Hz, 2H), 6.08 (s, 1H), 5.78 (dt,  $J = 10.3, 3.3$  Hz, 2H), 5.67 (dt,  $J = 10.3, 1.9$  Hz, 2H), 4.26 – 4.20 (m, 4H), 2.72 – 2.68 (m, 2H), 2.61 (s, 2H), 2.31 (s, 3H), 1.28 (t,  $J = 7.1$  Hz, 6H).  $^{13}\text{C}$  NMR (100 MHz,  $\text{CDCl}_3$ )  $\delta$  (ppm) 171.3, 151.3, 137.7, 132.6, 132.5, 128.7, 127.1, 123.9, 123.8, 64.2, 61.6, 51.3, 48.4, 25.8, 21.2, 14.1. HRMS (EI+, 70 eV): calcd for  $\text{C}_{23}\text{H}_{26}\text{O}_4$  [ $\text{M}^+$ ] 366.1826, found: 366.1820. IR (neat): 2982, 1726, 1662, 1446,

1366, 1282, 1233, 1178, 1088, 1025, 850, 816, 756  $\text{cm}^{-1}$ .

### diethyl 4-(4-butylphenyl)spiro[4.5]deca-3,6,9-triene-2,2-dicarboxylate **3ac**

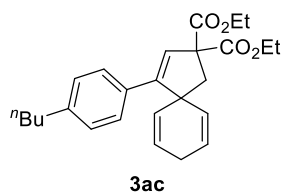

40.8 mg, colorless liquid, yield: 98%.  $^1\text{H}$  NMR (300 MHz,  $\text{CDCl}_3$ )  $\delta$  (ppm) 7.49 – 7.45 (m, 2H), 7.08 (d,  $J = 8.4$  Hz, 2H), 6.10 (s, 1H), 5.79 (dt,  $J = 10.4, 3.2$  Hz, 2H), 5.67 (dt,  $J = 10.3, 1.8$  Hz, 2H), 4.27 – 4.19 (m, 4H), 2.73 – 2.70 (m, 2H), 2.61 (s, 2H), 2.59 – 2.54 (m, 2H), 1.60 – 1.52 (m, 2H), 1.40 – 1.33 (m, 2H), 1.28 (t,  $J = 7.1$  Hz, 6H), 0.92 (t,  $J = 7.3$  Hz, 3H).  $^{13}\text{C}$  NMR (75 MHz,  $\text{CDCl}_3$ )  $\delta$  (ppm) 171.3, 151.2, 142.7, 132.6, 128.0, 127.0, 123.9, 123.7, 64.1, 61.6, 51.2, 48.5, 35.3, 33.4, 25.8, 22.3, 14.1, 13.9. HRMS (EI<sup>+</sup>, 70 eV): calcd for  $\text{C}_{26}\text{H}_{32}\text{O}_4$  [ $\text{M}^+$ ] 408.2295, found: 408.2283. IR (neat): 2960, 2930, 2859, 1730, 1662, 1446, 1369, 1282, 1230, 1178, 1092, 1064, 863, 857, 761  $\text{cm}^{-1}$ .

### diethyl 4-(4-(tert-butyl)phenyl)spiro[4.5]deca-3,6,9-triene-2,2-dicarboxylate **3ad**

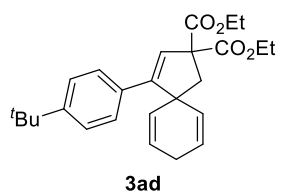

39.2 mg, white solid, yield: 96%. Melting point: 92 °C.  $^1\text{H}$  NMR (300 MHz,  $\text{CDCl}_3$ )  $\delta$  (ppm) 7.54 – 7.49 (m, 2H), 7.31 – 7.26 (m, 2H), 6.14 (s, 1H), 5.80 (dt,  $J = 10.3, 3.2$  Hz, 2H), 5.69 (dt,  $J = 10.2, 1.8$  Hz, 2H), 4.27 – 4.19 (m, 4H), 2.76 – 2.72 (m, 2H), 2.62 (s, 2H), 1.30 (s, 9H), 1.28 (t,  $J = 7.1$  Hz, 6H).  $^{13}\text{C}$  NMR (100 MHz,  $\text{CDCl}_3$ )  $\delta$  (ppm) 171.3, 150.84, 150.7, 132.6, 132.3, 126.8, 124.9, 124.0, 123.7, 64.1, 61.6, 51.1, 48.5, 34.5, 31.2, 25.9, 14.0. HRMS (EI<sup>+</sup>, 70 eV): calcd for  $\text{C}_{26}\text{H}_{32}\text{O}_4$  [ $\text{M}^+$ ] 408.2295, found: 408.2281. IR (neat): 2960, 2907, 2870, 1722, 1666, 1446, 1367, 1289, 1230, 1178, 1088, 1057, 857, 831, 764, 757  $\text{cm}^{-1}$ .

### diethyl 4-(4-methoxyphenyl)spiro[4.5]deca-3,6,9-triene-2,2-dicarboxylate **3ae**

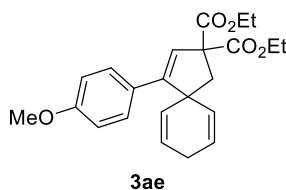

34.5 mg, colorless liquid, yield: 90%.  $^1\text{H}$  NMR (300 MHz,  $\text{CDCl}_3$ )  $\delta$  (ppm) 7.51 – 7.46 (m, 2H), 6.82 – 6.77 (m, 2H), 6.03 (s, 1H), 5.82 – 5.76 (m, 2H), 5.66 (dt,  $J = 10.3, 1.9$  Hz, 2H), 4.27 – 4.17 (m, 4H), 3.78 (s, 3H), 2.73 – 2.69 (m, 2H), 2.60 (s, 2H), 1.27 (t,  $J = 7.1$  Hz, 6H).  $^{13}\text{C}$  NMR (75 MHz,  $\text{CDCl}_3$ )  $\delta$  (ppm) 171.4, 159.2, 150.8, 132.6, 128.4, 127.9, 123.7, 122.9, 113.3, 64.1, 61.6, 55.2, 51.2, 48.4, 25.8, 14.1. calcd for  $\text{C}_{23}\text{H}_{26}\text{O}_5$  [ $\text{M}^+$ ] 382.1775, found: 382.1771. IR (neat): 2982, 1726, 1607, 1513, 1286, 1245, 1178, 1092, 1028, 857, 841, 736  $\text{cm}^{-1}$ .

### diethyl 4-([1,1'-biphenyl]-4-yl)spiro[4.5]deca-3,6,9-triene-2,2-dicarboxylate **3af**

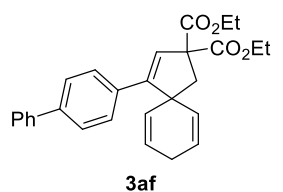

38 mg, colorless liquid, yield: 89%.  $^1\text{H}$  NMR (400 MHz,  $\text{CDCl}_3$ )  $\delta$  (ppm) 7.64 – 7.62 (m, 2H), 7.59 – 7.57 (m, 2H), 7.53 – 7.49 (m, 2H), 7.44 – 7.41 (m, 2H), 7.35 – 7.31 (m, 1H), 6.19 (s, 1H), 5.83 (dt,  $J = 10.3, 3.3$  Hz, 2H), 5.71 (dt,  $J = 10.3, 1.8$  Hz, 2H), 4.28 – 4.22 (m, 4H), 2.77 – 2.72 (m, 2H), 2.65 (s, 2H), 1.29 (t,  $J = 7.1$  Hz, 6H).  $^{13}\text{C}$  NMR (100 MHz,  $\text{CDCl}_3$ )  $\delta$  (ppm) 171.2, 150.9, 140.7, 140.5, 134.4, 132.5, 128.7, 127.6, 127.3, 126.9, 126.6, 124.8, 124.0, 64.2, 61.7, 51.3, 48.5, 25.9, 14.1. HRMS (EI<sup>+</sup>, 70 eV): calcd for  $\text{C}_{28}\text{H}_{28}\text{O}_4$  [ $\text{M}^+$ ] 428.1982, found: 428.1964. IR (neat): 2982, 1726, 1487, 1230, 1178, 1043, 941, 838, 767, 730, 697  $\text{cm}^{-1}$ .

### diethyl 4-(4-fluorophenyl)spiro[4.5]deca-3,6,9-triene-2,2-dicarboxylate **3ag**

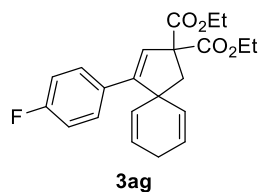

34.7 mg, yellow liquid, yield: 94%.  $^1\text{H}$  NMR (300 MHz,  $\text{CDCl}_3$ )  $\delta$  (ppm) 7.54 – 7.47 (m, 2H), 6.97 – 6.91 (m, 2H), 6.06 (s, 1H), 5.82 – 5.76 (m, 2H), 5.64 (dt,  $J = 10.3, 1.9$  Hz, 2H), 4.27 – 4.19 (m, 4H), 2.71 – 2.66 (m, 2H), 2.61 (s, 2H), 1.28 (t,  $J = 7.1$  Hz, 6H).  $^{13}\text{C}$  NMR (75 MHz,  $\text{CDCl}_3$ )  $\delta$  (ppm) 171.2, 164.4 (d,  $J = 246$  Hz), 150.5, 132.2, 131.5 (d,  $J = 3.3$  Hz), 128.9 (d,  $J = 7.9$  Hz), 124.5 (d,  $J = 1.7$  Hz), 124.1, 114.8 (d,  $J = 21.1$  Hz), 64.1, 61.7, 51.4, 48.3, 25.8, 14.1.  $^{19}\text{F}$  NMR (376 MHz,  $\text{CDCl}_3$ )  $\delta$  (ppm) -114.50. HRMS (EI<sup>+</sup>, 70 eV): calcd for  $\text{C}_{22}\text{H}_{23}\text{O}_4\text{F}$  [ $\text{M}^+$ ] 370.1575, found: 370.1598. IR (neat): 2982, 1726, 1662, 1602, 1509, 1282, 1226, 1159, 1088, 857, 843, 812, 759  $\text{cm}^{-1}$ .

### diethyl 4-(4-chlorophenyl)spiro[4.5]deca-3,6,9-triene-2,2-dicarboxylate **3ah**

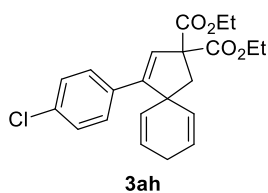

37.5 mg, yellow liquid, yield: 97%.  $^1\text{H}$  NMR (300 MHz,  $\text{CDCl}_3$ )  $\delta$  (ppm) 7.48 – 7.43 (m, 2H), 7.23 – 7.19 (m, 2H), 6.10 (s, 1H), 5.79 (dt,  $J = 10.3, 3.3$  Hz, 2H), 5.64 (dt,  $J = 10.3, 1.9$  Hz, 2H), 4.27 – 4.19 (m, 4H), 2.71 – 2.66 (m, 2H), 2.61 (s, 2H), 1.28 (t,  $J = 7.1$  Hz, 6H).  $^{13}\text{C}$  NMR (75 MHz,  $\text{CDCl}_3$ )  $\delta$  (ppm) 171.0, 150.4, 133.8, 133.6, 132.1, 128.5, 128.1, 125.2, 124.1, 64.2, 61.7, 51.3, 48.3, 25.8, 14.0. HRMS (EI<sup>+</sup>, 70 eV): calcd for  $\text{C}_{22}\text{H}_{23}\text{O}_4\text{Cl}$  [ $\text{M}^+$ ] 386.1301, found: 386.1303. IR (neat): 2982, 1726, 1666, 1491, 1368, 1282, 1230, 1178, 1088, 1013, 857, 827, 734  $\text{cm}^{-1}$ .

### diethyl 4-(4-bromophenyl)spiro[4.5]deca-3,6,9-triene-2,2-dicarboxylate 3ai

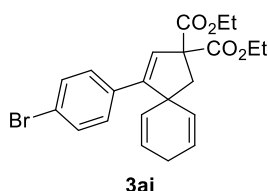

39.6 mg, colorless liquid, yield: 92%.  $^1\text{H}$  NMR (300 MHz,  $\text{CDCl}_3$ )  $\delta$  (ppm) 7.38 (d,  $J = 1.6$  Hz, 4H), 6.11 (s, 1H), 5.79 (dt,  $J = 10.3, 3.3$  Hz, 2H), 5.63 (dt,  $J = 10.3, 1.9$  Hz, 2H), 4.27 – 4.19 (m, 4H), 2.71 – 2.65 (m, 2H), 2.61 (s, 2H), 1.28 (t,  $J = 7.1$  Hz, 6H).  $^{13}\text{C}$  NMR (100 MHz,  $\text{CDCl}_3$ )  $\delta$  (ppm) 171.0, 150.4, 134.3, 132.1, 131.0, 128.8, 125.3, 124.2, 121.9, 64.2, 61.8, 51.3, 48.3, 25.8, 14.0. HRMS (EI<sup>+</sup>, 70 eV): calcd for  $\text{C}_{22}\text{H}_{23}\text{O}_4\text{Br}$  [ $\text{M}^+$ ] 430.0774, found: 430.0763.

IR (neat): 2982, 1722, 1659, 1487, 1368, 1282, 1230, 1178, 1092, 1048, 909, 857, 827, 731, 704  $\text{cm}^{-1}$ .

### diethyl 4-(4-(trifluoromethyl)phenyl)spiro[4.5]deca-3,6,9-triene-2,2-dicarboxylate 3aj

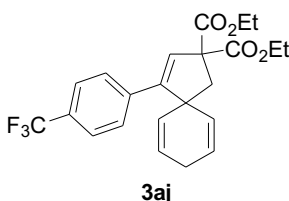

35.6 mg, colorless liquid, yield: 85%.  $^1\text{H}$  NMR (300 MHz,  $\text{CDCl}_3$ )  $\delta$  (ppm) 7.59 (d,  $J = 8.1$  Hz, 2H), 7.46 (d,  $J = 8.2$  Hz, 2H), 6.15 (s, 1H), 5.80 – 5.74 (m, 2H), 5.60 (dt,  $J = 10.3, 1.9$  Hz, 2H), 4.25 – 4.16 (m, 4H), 2.68 – 2.63 (m, 2H), 2.60 (s, 2H), 1.24 (t,  $J = 7.1$  Hz, 6H).  $^{13}\text{C}$  NMR (75 MHz,  $\text{CDCl}_3$ )  $\delta$  (ppm) 170.9, 150.3, 139.0 (q,  $J = 1.2$  Hz), 131.9, 127.5, 127.0 (q,  $J = 168.6$  Hz), 126.8, 124.8 (q,  $J = 3.8$  Hz), 124.4, 64.3, 61.8, 51.4, 48.3, 25.8, 14.0.  $^{19}\text{F}$  NMR (375 MHz,  $\text{CDCl}_3$ )  $\delta$  (ppm) -63.16. HRMS (EI<sup>+</sup>, 70 eV): calcd for  $\text{C}_{23}\text{H}_{23}\text{O}_4\text{F}_3$  [ $\text{M}^+$ ] 420.1543, found: 420.1536. IR (neat): 2986, 1730, 1662, 1323, 1286, 1234, 1162, 1114, 1066, 1014, 842, 741  $\text{cm}^{-1}$ .

### diethyl 4-(o-tolyl)spiro[4.5]deca-3,6,9-triene-2,2-dicarboxylate 3ak

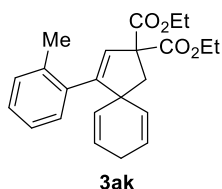

35.9 mg, yellow liquid, yield: 98%.  $^1\text{H}$  NMR (300 MHz,  $\text{CDCl}_3$ )  $\delta$  (ppm) 7.18 – 7.13 (m, 3H), 7.07 – 7.02 (m, 1H), 5.72 – 5.61 (m, 4H), 5.70 (s, 1H), 4.24 (q,  $J = 7.1$  Hz, 4H), 2.64 (s, 2H), 2.51 – 2.41 (m, 1H), 2.32 (s, 3H), 2.25 – 2.16 (m, 1H), 1.28 (t,  $J = 7.1$  Hz, 6H).  $^{13}\text{C}$  NMR (75 MHz,  $\text{CDCl}_3$ )  $\delta$  (ppm) 171.5, 151.4, 136.5, 135.4, 131.2, 129.8, 128.6, 127.1, 127.0, 124.6, 124.4, 65.1, 61.6, 54.2, 47.1, 25.6, 20.6, 14.1. HRMS (EI<sup>+</sup>, 70 eV): calcd for  $\text{C}_{23}\text{H}_{26}\text{O}_4$  [ $\text{M}^+$ ] 366.1826, found: 366.1811. IR (neat): 2982, 1726, 1446, 1368, 1262, 1118, 909, 727  $\text{cm}^{-1}$ .

### diethyl 4-(2-fluorophenyl)spiro[4.5]deca-3,6,9-triene-2,2-dicarboxylate 3al

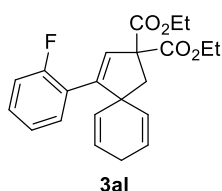

36.3 mg, colorless liquid, yield: 98%.  $^1\text{H}$  NMR (400 MHz,  $\text{CDCl}_3$ )  $\delta$  (ppm) 7.48 (td,  $J = 7.8, 1.8$  Hz, 1H), 7.22 – 7.16 (m, 1H), 7.05 – 6.97 (m, 2H), 6.23 (d,  $J = 2.2$  Hz, 1H), 5.75 (dt,  $J = 10.3, 3.2$  Hz, 2H), 5.67 (dt,  $J = 10.3, 1.8$  Hz, 2H), 4.27 – 4.20 (m, 4H), 2.69 – 2.63 (m, 1H), 2.61 (s, 2H), 2.56 – 2.48 (m, 1H), 1.28 (t,  $J = 7.1$  Hz, 6H).  $^{13}\text{C}$  NMR (100 MHz,  $\text{CDCl}_3$ )  $\delta$  (ppm) 171.1, 160.8 (d,  $J = 248.2$  Hz), 144.5 (d,  $J = 2.6$  Hz), 132.0, 129.6 (d,  $J = 3.0$  Hz), 129.2 (d,  $J = 9.4$  Hz), 128.9 (d,  $J = 8.9$  Hz), 124.1, 123.3, 123.1 (d,  $J = 3.5$  Hz), 115.5 (d,  $J = 23.2$  Hz), 65.0, 61.7, 52.6, 47.5,

25.7, 14.0.  $^{19}\text{F}$  NMR (376 MHz,  $\text{CDCl}_3$ )  $\delta$  (ppm) -112.29. HRMS (EI<sup>+</sup>, 70 eV): calcd for  $\text{C}_{22}\text{H}_{23}\text{O}_4\text{F}$  [ $\text{M}^+$ ] 370.1575, found: 370.1566. IR (neat): 2982, 1730, 1491, 1446, 1230, 1181, 1115, 1085, 857, 734  $\text{cm}^{-1}$ .

### diethyl 4-(2-chlorophenyl)spiro[4.5]deca-3,6,9-triene-2,2-dicarboxylate 3am

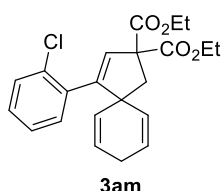

30.5 mg, yellow liquid, yield: 79%.  $^1\text{H}$  NMR (400 MHz,  $\text{CDCl}_3$ )  $\delta$  (ppm) 7.36 – 7.34 (m, 1H), 7.27 – 7.24 (s, 1H), 7.18 – 7.09 (m, 2H), 5.90 (s, 1H), 5.69 (s, 4H), 4.24 (q,  $J = 7.1$  Hz, 4H), 2.66

(s, 2H), 2.51 – 2.45 (m, 1H), 2.25 – 2.19 (m, 1H), 1.28 (t,  $J = 7.1$  Hz, 6H).  $^{13}\text{C}$  NMR (100 MHz,  $\text{CDCl}_3$ )  $\delta$  (ppm) 171.2, 148.7, 134.7, 133.8, 131.0, 130.1, 129.4, 128.7, 128.4, 125.5, 124.6, 65.3, 61.7, 54.2, 46.9, 25.6, 14.1. HRMS (EI<sup>+</sup>, 70 eV): calcd for  $\text{C}_{22}\text{H}_{23}\text{O}_4\text{Cl}$  [ $\text{M}^+$ ] 386.1279, found: 386.1267. IR (neat): 2982, 1726, 1472, 1435, 1367, 1260, 1230, 1181, 1055, 909, 857, 730  $\text{cm}^{-1}$ .

### diethyl 4-(3-chlorophenyl)spiro[4.5]deca-3,6,9-triene-2,2-dicarboxylate 3an

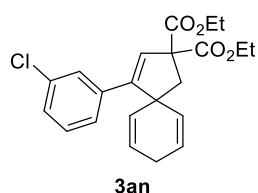

36.1 mg, yellow liquid, yield: 93%.  $^1\text{H}$  NMR (300 MHz,  $\text{CDCl}_3$ )  $\delta$  (ppm) 7.52 – 7.51 (m, 1H), 7.40 (dt,  $J = 6.7, 1.9$  Hz, 1H), 7.23 – 7.17 (m, 2H), 6.13 (s, 1H), 5.81 (dt,  $J = 10.3, 3.3$  Hz, 2H), 5.63 (dt,  $J = 10.3, 1.9$  Hz, 2H), 4.27 – 4.19 (m, 4H), 2.73 – 2.68 (m, 2H), 2.62 (s, 2H), 1.28 (t,  $J = 7.1$  Hz, 6H).  $^{13}\text{C}$  NMR (75 MHz,  $\text{CDCl}_3$ )  $\delta$  (ppm) 171.0, 150.2, 137.2, 133.8, 132.0, 129.1, 127.8, 127.3, 125.9, 125.3, 124.3, 64.2, 61.8, 51.3, 48.3, 25.8, 14.0. HRMS (EI<sup>+</sup>, 70 eV): calcd for  $\text{C}_{22}\text{H}_{23}\text{O}_4\text{Cl}$  [ $\text{M}^+$ ] 386.1279, found: 386.1264. IR (neat): 2982, 1726, 1662, 1561, 1476, 1368, 1230, 1178, 1096, 1047, 998, 857, 786, 730  $\text{cm}^{-1}$ .

### diethyl 4-(4-methoxyphenyl)spiro[4.5]deca-3,6,9-triene-2,2-dicarboxylate 3ao

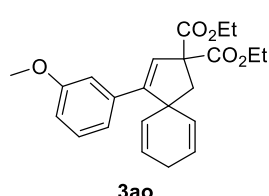

35.9 mg, colorless liquid, yield: 94%.  $^1\text{H}$  NMR (300 MHz,  $\text{CDCl}_3$ )  $\delta$  (ppm) 7.18 – 7.12 (m, 3H), 6.81 – 6.78 (m, 1H), 6.13 (s, 1H), 5.80 (dt,  $J = 10.3, 3.2$  Hz, 2H), 5.68 (dt,  $J = 10.3, 1.8$  Hz, 2H), 4.27 – 4.19 (m, 4H), 3.76 (s, 3H), 2.71 – 2.69 (m, 2H), 2.62 (s, 2H), 1.28 (t,  $J = 7.1$  Hz, 6H).  $^{13}\text{C}$  NMR (75 MHz,  $\text{CDCl}_3$ )  $\delta$  (ppm) 171.2, 159.0, 151.2, 136.7, 132.5, 128.9, 125.0, 123.8, 119.8, 113.6, 112.6, 64.1, 61.7, 55.1, 51.3, 48.4, 25.9, 14.0. HRMS (EI<sup>+</sup>, 70 eV): calcd for  $\text{C}_{23}\text{H}_{26}\text{O}_5$  [ $\text{M}^+$ ] 382.1775, found: 382.1760. IR (neat): 2982, 1726, 1599, 1487, 1290, 1248, 1207, 1178, 1040, 849, 782, 697  $\text{cm}^{-1}$ .

### diethyl 4-(3-hydroxyphenyl)spiro[4.5]deca-3,6,9-triene-2,2-dicarboxylate 3ap

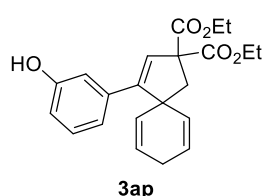

26.3 mg, yellow liquid, yield: 71%.  $^1\text{H}$  NMR (300 MHz,  $\text{CDCl}_3$ )  $\delta$  (ppm) 7.12 – 7.09 (m, 2H), 7.02 – 7.00 (m, 1H), 6.74 – 6.70 (m, 1H), 6.09 (s, 1H), 5.81 – 5.75 (m, 2H), 5.65 (dt,  $J = 10.3, 1.9$  Hz, 2H), 5.21 (s, 1H), 4.25 – 4.19 (m, 4H), 2.70 – 2.68 (m, 2H), 2.61 (s, 2H), 1.27 (t,  $J = 7.1$  Hz, 6H).  $^{13}\text{C}$  NMR (100 MHz,  $\text{CDCl}_3$ )  $\delta$  (ppm) 171.3, 155.2, 151.2, 137.0, 132.3, 129.1, 125.1, 124.0, 119.8, 114.8, 114.2, 64.1, 61.8, 51.3, 48.4, 25.8, 14.0. HRMS (EI<sup>+</sup>, 70 eV): calcd for  $\text{C}_{22}\text{H}_{24}\text{O}_5$  [ $\text{M}^+$ ] 368.1618, found: 368.1615. IR (neat): 2982, 1722, 1580, 1446, 1297, 1260, 1185, 909, 857, 730  $\text{cm}^{-1}$ .

### diethyl 4-(3,5-difluorophenyl)spiro[4.5]deca-3,6,9-triene-2,2-dicarboxylate 3aq

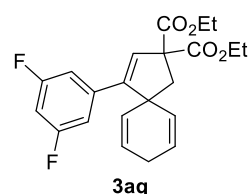

33.1 mg, colorless liquid, yield: 85%.  $^1\text{H}$  NMR (400 MHz,  $\text{CDCl}_3$ )  $\delta$  (ppm) 7.08 – 7.02 (m, 2H), 6.68 (tt,  $J = 8.8, 2.3$  Hz, 1H), 6.15 (s, 1H), 5.82 (dt,  $J = 10.3, 3.3$  Hz, 2H), 5.62 (dt,  $J = 10.3, 2.0$  Hz, 2H), 4.27 – 4.19 (m, 4H), 2.73 – 2.69 (m, 2H), 2.62 (s, 2H), 1.28 (t,  $J = 7.1$  Hz, 6H).  $^{13}\text{C}$  NMR (100 MHz,  $\text{CDCl}_3$ )  $\delta$  (ppm) 170.8, 163.8 (d,  $J = 13.0$  Hz), 161.3 (d,  $J = 13.0$  Hz), 149.4 (t,  $J = 2.6$  Hz), 138.5 (t,  $J = 9.9$  Hz), 131.7, 127.0, 124.5, 110.1 (d,  $J = 25.6$  Hz), 110.1 (d,  $J = 11.7$  Hz), 103.1 (t,  $J = 25.4$ ), 64.1, 61.9, 51.3, 48.3, 25.8, 14.0.  $^{19}\text{F}$  NMR (376 MHz,  $\text{CDCl}_3$ )  $\delta$  -110.9 (t,  $J = 17.6$  Hz). HRMS (EI<sup>+</sup>, 70 eV): calcd for  $\text{C}_{22}\text{H}_{22}\text{O}_4\text{F}_2$  [ $\text{M}^+$ ] 388.1481, found: 388.1479. IR (neat): 2982, 2937, 1730, 1621, 1588, 1435, 1334, 1256, 1193, 988, 845, 730  $\text{cm}^{-1}$ .

### diethyl 4-(2,4,5-trimethylphenyl)spiro[4.5]deca-3,6,9-triene-2,2-dicarboxylate 3ar

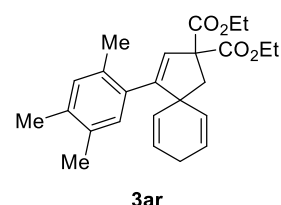

36.8 mg, colorless liquid, yield: 93%.  $^1\text{H}$  NMR (300 MHz,  $\text{CDCl}_3$ )  $\delta$  (ppm) 6.98 (s, 1H), 6.93 (s, 1H), 5.70 (dt,  $J = 10.7, 2.8$  Hz, 2H), 5.67 – 5.62 (m, 3H), 4.23 (q,  $J = 7.1$  Hz, 4H), 2.62 (s, 2H), 2.54 – 2.44 (m, 1H), 2.32 – 2.27 (m, 1H), 2.25 (s, 3H), 2.18 (s, 3H), 2.14 (s,

3H), 1.27 (t,  $J = 7.1$  Hz, 6H).  $^{13}\text{C}$  NMR (75 MHz,  $\text{CDCl}_3$ )  $\delta$  (ppm) 171.5, 151.3, 135.3, 133.7, 132.8, 132.4, 131.4, 131.3, 129.6, 126.9, 124.4, 65.0, 61.6, 54.0, 47.3, 25.7, 20.0, 19.4, 19.2, 14.1. HRMS (EI+, 70 eV): calcd for  $\text{C}_{25}\text{H}_{30}\text{O}_4$  [ $\text{M}^+$ ] 394.2139, found: 394.2152. IR (neat): 2982, 2922, 2866, 1730, 1446, 1249, 1178, 1062, 857, 700  $\text{cm}^{-1}$ .

### diethyl 4-(6-methoxynaphthalen-2-yl)spiro[4.5]deca-3,6,9-triene-2,2-dicarboxylate **3as**

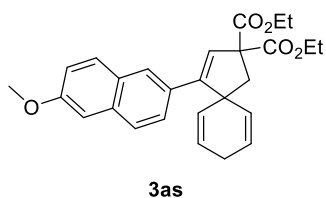

42.4 mg, yellow liquid, yield: 98%.  $^1\text{H}$  NMR (300 MHz,  $\text{CDCl}_3$ )  $\delta$  (ppm) 7.94 (s, 1H), 7.64 – 7.60 (m, 3H), 7.12 – 7.07 (m, 2H), 6.23 (s, 1H), 5.83 (dt,  $J = 10.4$ , 3.1 Hz, 2H), 5.73 (dt,  $J = 10.2$ , 1.7 Hz, 2H), 4.29 – 4.21 (m, 4H), 3.91 (s, 3H), 2.81 – 2.74 (m, 2H), 2.66 (s, 2H), 1.29 (t,  $J = 7.1$  Hz, 6H).  $^{13}\text{C}$  NMR (75 MHz,  $\text{CDCl}_3$ )  $\delta$  (ppm) 171.3, 157.8, 151.3, 134.0, 132.7, 130.5, 129.9, 128.4, 126.22, 126.18, 125.9, 124.3, 123.8, 118.7, 105.5, 64.2, 61.7, 55.3, 51.4, 48.5, 25.9, 14.1. HRMS (EI+, 70 eV): calcd for

$\text{C}_{27}\text{H}_{28}\text{O}_5$  [ $\text{M}^+$ ] 432.1931, found: 432.1924. IR (neat): 2982, 1726, 1628, 1484, 1390, 1230, 1033, 909, 850, 726  $\text{cm}^{-1}$ .

### diethyl 4-(pyridin-3-yl)spiro[4.5]deca-3,6,9-triene-2,2-dicarboxylate **3at**

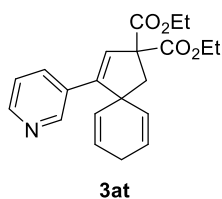

34.7 mg, yellow liquid, yield: 98%.  $^1\text{H}$  NMR (300 MHz,  $\text{CDCl}_3$ )  $\delta$  (ppm) 8.73 (dd,  $J = 2.2$ , 0.7 Hz, 1H), 8.46 (dd,  $J = 4.8$ , 1.6 Hz, 1H), 7.79 (dt,  $J = 8.0$ , 1.9 Hz, 1H), 7.17 (ddd,  $J = 8.0$ , 4.8, 0.7 Hz, 1H), 6.17 (s, 1H), 5.80 (dt,  $J = 10.3$ , 3.3 Hz, 2H), 5.63 (dt,  $J = 10.3$ , 1.9 Hz, 2H), 4.29 – 4.19 (m, 4H), 2.71 – 2.66 (m, 2H), 2.63 (s, 2H), 1.28 (t,  $J = 7.1$  Hz, 6H).  $^{13}\text{C}$  NMR (75 MHz,  $\text{CDCl}_3$ )  $\delta$  (ppm) 170.9, 148.7, 148.6, 148.4, 134.3, 131.6, 131.2, 126.1, 124.6, 122.8, 64.4, 61.8, 51.4, 48.1,

25.8, 14.0. HRMS (EI+, 70 eV): calcd for  $\text{C}_{21}\text{H}_{23}\text{NO}_4$  [ $\text{M}^+$ ] 353.1621, found: 353.1615. IR (neat): 2982, 1726, 1666, 1286, 1230, 1178, 1088, 1025, 857, 805, 730  $\text{cm}^{-1}$ .

### diethyl 4-(pyridin-2-yl)spiro[4.5]deca-3,6,9-triene-2,2-dicarboxylate **3au**

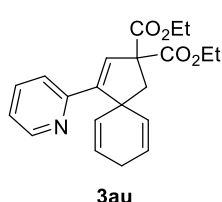

27.3 mg, yellow liquid, yield: 77%.  $^1\text{H}$  NMR (300 MHz,  $\text{CDCl}_3$ )  $\delta$  (ppm) 8.58 – 8.56 (m, 1H), 7.58 – 7.52 (m, 1H), 7.48 – 7.45 (m, 1H), 7.14 – 7.10 (m, 1H), 6.80 (s, 1H), 5.82 (dt,  $J = 10.3$ , 3.2 Hz, 2H), 5.69 (dt,  $J = 10.3$ , 1.9 Hz, 2H), 4.28 – 4.16 (m, 4H), 2.77 – 2.74 (m, 2H), 2.68 (s, 2H), 1.27 (t,  $J = 7.1$  Hz, 6H).  $^{13}\text{C}$  NMR (75 MHz,  $\text{CDCl}_3$ )  $\delta$  (ppm) 170.9, 152.9, 150.3, 149.5, 135.9, 132.3, 129.0, 124.0, 122.5, 121.4, 64.1, 61.8, 50.1, 48.7, 25.8, 14.0. HRMS (EI+, 70 eV): calcd for

$\text{C}_{21}\text{H}_{23}\text{NO}_4$  [ $\text{M}^+$ ] 353.1622, found: 353.1609. IR (neat): 2982, 1726, 1666, 1584, 1469, 1286, 1233, 1148, 1088, 1029, 857, 787  $\text{cm}^{-1}$ .

### diethyl 4-(3-ethynylphenyl)spiro[4.5]deca-3,6,9-triene-2,2-dicarboxylate **3av**

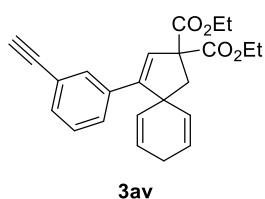

22.8 mg, colorless liquid, yield: 61%.  $^1\text{H}$  NMR (300 MHz,  $\text{CDCl}_3$ )  $\delta$  (ppm) 7.66 (t,  $J = 1.5$  Hz, 1H), 7.51 (dt,  $J = 7.9$ , 1.4 Hz, 1H), 7.36 (dt,  $J = 7.5$ , 1.2 Hz, 1H), 7.20 (t,  $J = 7.7$  Hz, 1H), 6.13 (s, 1H), 5.80 (dt,  $J = 10.3$ , 3.3 Hz, 2H), 5.64 (dt,  $J = 10.3$ , 1.9 Hz, 2H), 4.27 – 4.19 (m, 4H), 3.04 (s, 1H), 2.71 – 2.68 (m, 2H), 2.62 (s, 2H), 1.28 (t,  $J = 7.1$  Hz, 6H).  $^{13}\text{C}$  NMR (75 MHz,  $\text{CDCl}_3$ )  $\delta$  (ppm) 171.0, 150.6, 135.6, 132.0, 131.3, 131.0, 127.9, 127.6, 125.5, 124.2, 121.7, 83.6, 76.97, 64.2, 61.7, 51.3, 48.3, 25.8, 14.0. HRMS (EI+, 70 eV): calcd for  $\text{C}_{24}\text{H}_{24}\text{O}_4$  [ $\text{M}^+$ ]

376.1669, found: 376.1660. IR (neat): 3280, 2982, 1722, 1662, 1290, 1238, 1178, 1088, 1054, 857, 797  $\text{cm}^{-1}$ .

### tetraethyl 4,4'-(1,3-phenylene)bis(spiro[4.5]deca-3,6,9-triene-2,2-dicarboxylate) **3av'**

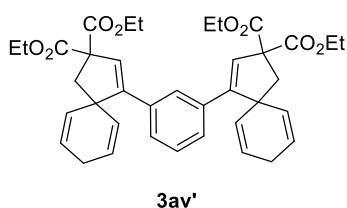

11.2 mg, colorless liquid, yield: 18%.  $^1\text{H}$  NMR (300 MHz,  $\text{CDCl}_3$ )  $\delta$  (ppm) 7.74 (t,  $J = 1.6$  Hz, 1H), 7.42 (dd,  $J = 7.8$ , 1.7 Hz, 2H), 7.13 (t,  $J = 7.8$  Hz, 1H), 6.05 (s, 2H), 5.79 (dt,  $J = 10.3$ , 3.2 Hz, 4H), 5.64 (dt,  $J = 10.3$ , 1.8 Hz, 4H), 4.27 – 4.19 (m, 8H), 2.73 – 2.70 (m, 4H), 2.60 (s, 4H), 1.28 (t,  $J = 7.1$  Hz, 12H).  $^{13}\text{C}$  NMR (75 MHz,  $\text{CDCl}_3$ )  $\delta$  (ppm) 171.2, 151.3, 135.0, 132.4, 127.5, 126.6, 126.5, 124.7, 123.9, 64.2, 61.7, 51.3, 48.4, 25.8, 14.1. HRMS (ESI-TOF):  $m/z$  calcd for  $\text{C}_{38}\text{H}_{42}\text{O}_8\text{Na}$  [ $\text{M} + \text{Na}$ ] $^+$



649.2772, found: 649.2790. IR (neat): 2982, 2926, 1722, 1662, 1446, 1368, 1230, 1178, 1151, 1092, 1051, 857, 798 731, 700  $\text{cm}^{-1}$ .

### diethyl 4-butylspiro[4.5]deca-3,6,9-triene-2,2-dicarboxylate **3aw**

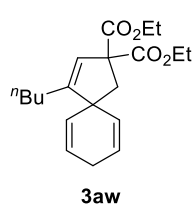

24 mg, colorless liquid, yield: 72%.  $^1\text{H}$  NMR (300 MHz,  $\text{CDCl}_3$ )  $\delta$  (ppm) 5.77 (dt,  $J = 10.1, 3.3$  Hz, 2H), 5.43 (m, 3H), 4.19 (q,  $J = 7.2$  Hz, 4H), 2.62 (dt,  $J = 5.3, 2.2$  Hz, 2H), 2.45 (s, 2H), 1.90 – 1.83 (m, 2H), 1.51 – 1.41 (m, 2H), 1.36 – 1.29 (m, 2H), 1.25 (t,  $J = 7.1$  Hz, 6H), 0.88 (t,  $J = 7.3$  Hz, 3H).  $^{13}\text{C}$  NMR (75 MHz,  $\text{CDCl}_3$ )  $\delta$  (ppm) 171.9, 155.1, 131.7, 124.1, 120.6, 64.8, 61.4, 52.3, 46.6, 29.8, 27.3, 25.8, 22.6, 14.1, 14.0. HRMS (EI<sup>+</sup>, 70 eV): calcd for  $\text{C}_{20}\text{H}_{28}\text{O}_4$  [ $\text{M}^+$ ] 332.1988 found: 332.1988. IR (neat): 2960, 2930, 2870, 1730, 1662, 1446, 1368, 1249, 1178, 1065, 1059, 861, 756  $\text{cm}^{-1}$ .

### Diethyl4-((8R,9S,13S,14S)-13-methyl-17-oxo-7,8,9,11,12,13,14,15,16,17-decahydro-6H-cyclopenta[a]phenanthren-3-yl)spiro[4.5]deca-3,6,9-triene-2,2-dicarboxylate **3ax**

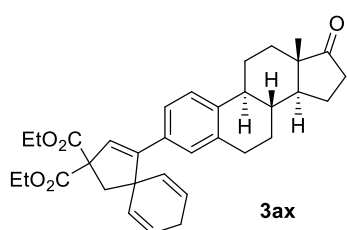

43 mg, yellow liquid, yield: 81%.  $^1\text{H}$  NMR (300 MHz,  $\text{CDCl}_3$ )  $\delta$  (ppm) 7.36 – 7.30 (m, 2H), 7.20 – 7.17 (m, 1H), 6.10 (s, 1H), 5.82 – 5.77 (m, 2H), 5.67 (dt,  $J = 10.4, 1.9$  Hz, 2H), 4.26 – 4.18 (m, 4H), 2.88 – 2.84 (m, 2H), 2.75 – 2.68 (m, 2H), 2.60 (s, 2H), 2.50 (dd,  $J = 18.3, 8.4$  Hz, 1H), 2.42 – 2.37 (m, 1H), 2.23 – 2.14 (m, 1H), 2.09 – 1.93 (m, 4H), 1.62 – 1.53 (m, 4H), 1.47 – 1.39 (m, 2H), 1.27 (t,  $J = 7.1$  Hz, 6H), 0.89 (s, 3H).  $^{13}\text{C}$  NMR (75 MHz,  $\text{CDCl}_3$ )  $\delta$  (ppm) 220.9, 171.3, 151.00, 139.6, 135.9, 132.8, 132.6, 127.8, 124.9, 124.4, 124.2, 123.8, 123.7, 64.1, 61.6, 51.2, 50.5, 48.4, 47.9, 44.4, 38.0, 35.8, 31.5, 29.4, 26.5, 25.9, 25.6, 21.6, 14.1, 13.8. HRMS (EI):  $m/z$  [ $\text{M} + \text{H}$ ]<sup>+</sup> calcd for  $\text{C}_{34}\text{H}_{41}\text{O}_5$ : 529.2949, found: 529.2958. IR (neat): 2930, 2866, 1454, 1368, 1238, 1178, 1084, 854, 700  $\text{cm}^{-1}$ .

## 5. Preparative Utility of the Methodology

### 5.1 Gram-Scale Reaction

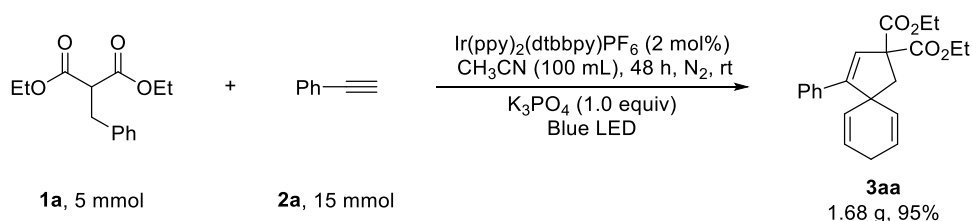

**1a** (1.25 g, 5 mmol), **2a** (1.53 g, 15 mmol), Ir(ppy)<sub>2</sub>(dtbbpy)PF<sub>6</sub> (91.3 mg, 2 mol%), K<sub>3</sub>PO<sub>4</sub> (1.06 g, 1.0 equiv) and degassed CH<sub>3</sub>CN (100 mL) were added to the oven-dried reactor under nitrogen atmosphere. Then, the reaction mixture was degassed three times via ‘freeze-pump-thaw’ procedure under nitrogen atmosphere. The reaction was irradiated (blue LEDs, 455 nm) at room temperature for 48 h upon which the reaction was completed as monitored by TLC analysis. The resulting mixture was purified by flash chromatography on silica (petroleum ether/ethylacetate 100:1~20:1) to give product **3aa** (1.68 g, 95% yield) as a yellow liquid.

## 5.2 Synthetic Transformations of **3aa**

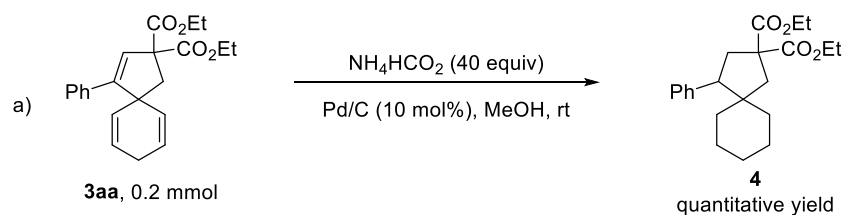

In a flame-dried Schlenk tube, **3aa** (70.5 mg, 0.2 mmol) and ammonium formate (632 mg, 8 mmol) were dissolved in MeOH (2 mL) under nitrogen atmosphere. Then, Pd/C (106.4 mg, 10 w%, 0.02 mmol) was added and the reaction mixture was stirred for 20 h at room temperature. After that, the reaction system was filtered through a plug of silica gel using ethyl acetate and after removal of volatiles under reduced pressure, the desired product **4** was obtained as a colorless liquid (71.4 mg, quantitative yield). <sup>1</sup>H NMR (300 MHz, CDCl<sub>3</sub>) δ (ppm) 7.33 – 7.28 (m, 2H), 7.26 – 7.23 (m, 1H), 7.18 – 7.15 (m, 2H), 4.27 – 4.17 (m, 4H), 2.86 – 2.70 (m, 2H), 2.66 – 2.51 (m, 2H), 2.14 (dd, *J* = 14.1, 1.3 Hz, 1H), 1.64 – 1.30 (m, 8H), 1.27 (t, *J* = 7.1 Hz, 6H), 0.93 – 0.79 (m, 1H), 0.67 – 0.56 (m, 1H). <sup>13</sup>C NMR (75 MHz, CDCl<sub>3</sub>) δ (ppm) 173.1, 172.9, 138.9, 129.2, 127.7, 126.5, 61.5, 57.5, 56.0, 45.7, 42.5, 37.8, 37.2, 30.4, 25.9, 24.1, 22.1, 14.08, 14.05. HRMS (EI<sup>+</sup>, 70 eV): calcd for C<sub>22</sub>H<sub>30</sub>O<sub>4</sub> [M<sup>+</sup>] 358.2139, found: 358.2133. IR (neat): 2982, 2930, 2855, 1726, 1446, 1245, 1182, 1092, 1058, 861, 764, 700 cm<sup>-1</sup>.

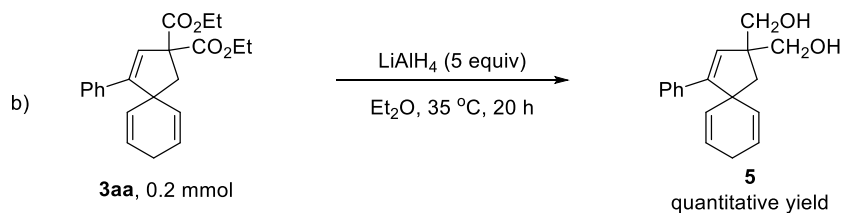

To a flame-dried Schlenk tube, LiAlH<sub>4</sub> (38 mg, 1 mmol) and Et<sub>2</sub>O (2 mL) were added under nitrogen atmosphere. Then, **3aa** (70.5 mg, 0.2 mmol) dissolved in Et<sub>2</sub>O (2 mL) was added dropwise to the reaction mixture. After complete addition the mixture was heated at 35 °C for 20 h. After work up, the resulting mixture was purified by flash chromatography on silica gel (petroleum ether/ethylacetate/dichloromethane 3:1:1), the desired product **5** was obtained as a white solid (53.5 mg, quantitative yield). Melting point: 99.5 °C. <sup>1</sup>H NMR (300 MHz, CDCl<sub>3</sub>) δ (ppm) 7.56 – 7.53 (m, 2H), 7.26 – 7.20 (m, 3H), 6.04 (s, 1H), 5.76 (dt, *J* = 11.1, 2.9 Hz, 2H), 5.70 (dt, *J* = 10.3, 1.6 Hz, 2H), 3.76 (s, 4H), 2.70 – 2.68 (m, 2H), 2.39 – 2.15 (m, 2H), 1.94 (s, 2H). <sup>13</sup>C NMR (75 MHz, CDCl<sub>3</sub>) δ (ppm) 149.9, 136.0, 134.0, 128.9, 127.9, 127.4, 126.9, 123.0, 70.0, 54.0, 51.3, 47.9, 25.8. HRMS (ESI-TOF) *m/z* calcd for C<sub>18</sub>H<sub>24</sub>NO<sub>2</sub> [M+NH<sub>4</sub>]<sup>+</sup> 386.1802, found: 286.1805. IR (neat): 3265, 2930, 2870, 1494, 1446, 1371, 1025, 943, 869, 764, 730, 685 cm<sup>-1</sup>.

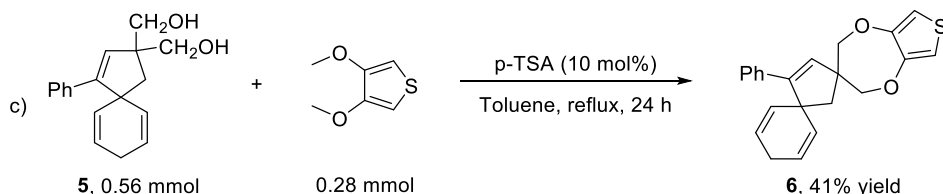

To an oven-dried round flask, **5** (150.3 mg, 0.56 mmol), 3,4-dimethoxythiophene (40.3 mg, 0.28 mmol), *p*-toluenesulfonic acid (*p*-TSA, 10 mol%) and anhydrous toluene (5 mL) were added under nitrogen atmosphere. Then, the reaction mixture was refluxed for 24 h. After cooling the solvent was evaporated and the residue was purified by column chromatography on silica gel eluting with petroleum ether/ethylacetate 50:1 to give the desired product **6** as a yellow liquid (40.1 mg, 41%). <sup>1</sup>H NMR (300 MHz, CDCl<sub>3</sub>) δ (ppm) 7.56 – 7.53 (m, 2H), 7.29 – 7.22 (m, 3H), 6.48 (s,

2H), 6.14 (s, 1H), 5.79 (dt,  $J = 10.3, 3.2$  Hz, 2H), 5.68 (dt,  $J = 10.3, 1.8$  Hz, 2H), 4.09 – 4.00 (m, 4H), 2.73 – 2.69 (m, 2H), 2.01 (s, 2H).  $^{13}\text{C}$  NMR (75 MHz,  $\text{CDCl}_3$ )  $\delta$  (ppm) 145.0, 149.8, 133.6, 128.1, 128.0, 127.6, 127.0, 123.5, 105.1, 78.6, 55.1, 51.2, 48.4, 25.8. HRMS (EI<sup>+</sup>, 70 eV): calcd for  $\text{C}_{22}\text{H}_{20}\text{O}_2\text{S}$  [ $\text{M}^+$ ] 348.1179, found: 348.1169. IR (neat): 3023, 2922, 2855, 1484, 1446, 1368, 1260, 1189, 1021, 910, 850, 764, 727, 693  $\text{cm}^{-1}$ .

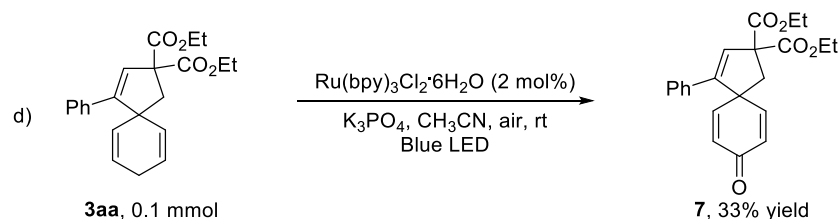

In a Schlenk tube, **3aa** (35.2 mg, 0.1 mmol),  $\text{K}_3\text{PO}_4$  (21.2 mg, 1.0 equiv) and  $\text{Ru}(\text{bpy})_3\text{Cl}_2 \cdot 6\text{H}_2\text{O}$  (1.5 mg, 2 mol%) were dissolved in  $\text{CH}_3\text{CN}$  (2 mL). Then, reaction mixture was stirred for 53 h under the irradiation of blue LED and air atmosphere. After that, the reaction system was purified through flash chromatography on silica gel eluting with petroleum ether/ethylacetate 10:1 to give the desired product **7** as a yellow liquid (6.6 mg, 33%, brsm) and 45% of **3aa** was recovered (0.045 mmol, 15.9 mg). In addition, we also found that **3aa** could also be slowly oxidized to give product **7** in the absence of photocatalyst.  $^1\text{H}$  NMR (400 MHz,  $\text{CDCl}_3$ )  $\delta$  (ppm) 7.33 – 7.30 (m, 2H), 7.27 – 7.20 (m, 3H), 7.02 – 6.96 (m, 2H), 6.40 (s, 1H), 6.37 – 6.31 (m, 2H), 4.32 – 4.22 (m, 4H), 2.81 (s, 2H), 1.30 (t,  $J = 7.1$  Hz, 6H).  $^{13}\text{C}$  NMR (75 MHz,  $\text{CDCl}_3$ )  $\delta$  (ppm) 185.4, 170.2, 153.5, 147.9, 133.8, 129.0, 128.8, 128.6, 128.4, 126.4, 64.9, 62.2, 55.3, 43.1, 14.0. HRMS (EI<sup>+</sup>, 70 eV): calcd for  $\text{C}_{22}\text{H}_{22}\text{O}_5$  [ $\text{M}^+$ ] 366.1462, found: 366.1448. IR (neat): 2982, 1730, 1662, 1625, 1446, 1282, 1230, 1178, 1085, 1025, 857, 760, 693  $\text{cm}^{-1}$ .

## 6. Mechanistic Studies

### 6.1 TEMPO Trapping Experiment

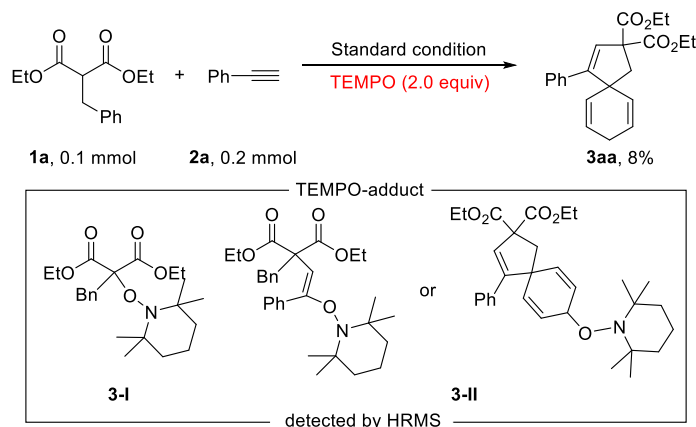

**1a** (25.0 mg, 0.1 mmol), **2a** (20.4 mg, 0.2 mmol),  $\text{Ir}(\text{ppy})_2\text{dtbbpyPF}_6$  (1.8 mg, 2 mol%),  $\text{K}_3\text{PO}_4$  (21.2 mg, 1.0 equiv), TEMPO (31.3 mg, 2.0 equiv) and anhydrous  $\text{CH}_3\text{CN}$  (2 mL) were added to a flame-dried Schlenk tube under nitrogen protection. Then, the reaction mixture was degassed for three times via the ‘freeze-pump-thaw’ procedure under a nitrogen atmosphere. The reaction mixture was irradiated (blue LEDs, 455 nm) at room temperature for 24 h. The chemical yield of **3aa** was detected by NMR analysis using 1,3,5-trimethoxybenzene as internal standard (8% yield) and the key intermediate **3-I** and **3-II** was detected by and HRMS.

**3-I**: HRMS (EI):  $m/z$  [ $\text{M} + \text{H}$ ]<sup>+</sup> calcd for  $\text{C}_{23}\text{H}_{36}\text{NO}_5$ : 406.2588, found: 406.2590.

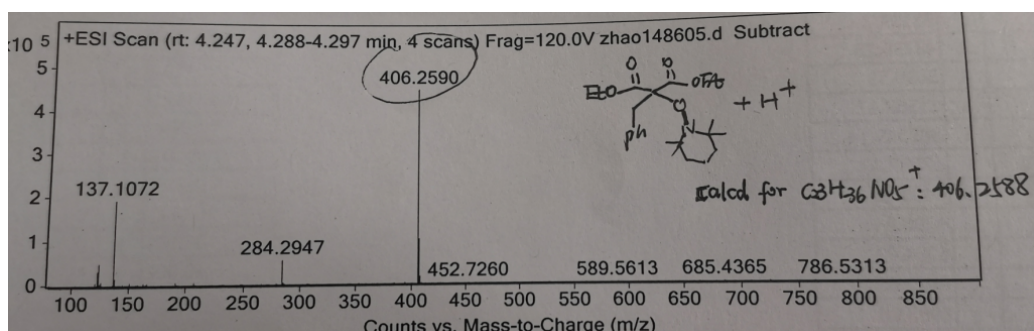

**3-II:** HRMS (EI):  $m/z$   $[M + H]^+$  calcd for  $C_{31}H_{36}NO_5$ : 508.3057, found: 406.3066.

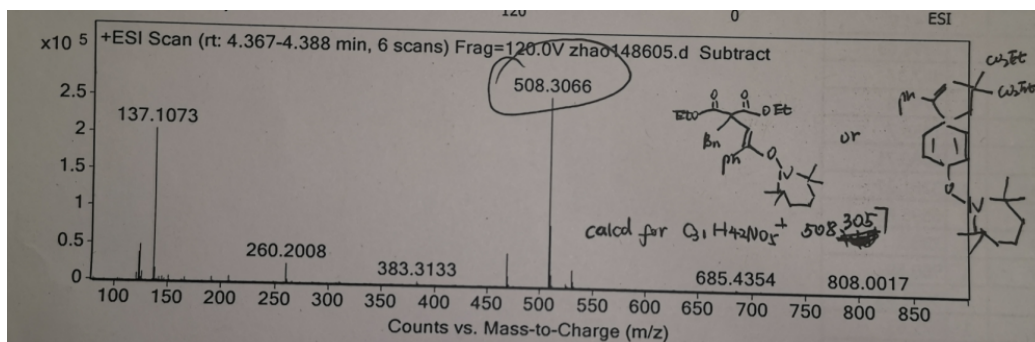

## 6.2 Allylic Sulfone Trapping Experiment

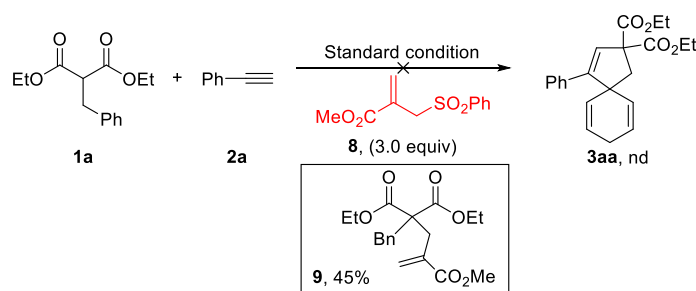

**1a** (25.0 mg, 0.1 mmol), **2a** (20.4 mg, 0.2 mmol), **9** (72.1 mg, 0.3 mmol), Ir(ppy)<sub>2</sub>dtbbpyPF<sub>6</sub> (1.8 mg, 2 mol%), K<sub>3</sub>PO<sub>4</sub> (21.2 mg, 1.0 equiv) and anhydrous CH<sub>3</sub>CN (2 mL) were added to a flame-dried Schlenk tube under nitrogen atmosphere. Then, the reaction mixture was degassed three times via the ‘freeze-pump-thaw’ procedure under nitrogen atmosphere. The reaction mixture was irradiated (blue LEDs, 455 nm) at room temperature for 24 h. No desired product **3aa** was generated, but product **9** was isolated as a colorless liquid (15.7 mg, 45% yield). <sup>1</sup>H NMR (300 MHz, CDCl<sub>3</sub>) δ (ppm) 7.26 – 7.02 (m, 3H), 7.15 (dd, *J* = 7.5, 2.0 Hz, 2H), 6.27 (d, *J* = 1.4 Hz, 1H), 5.68 (q, *J* = 1.2 Hz, 1H), 4.15 – 4.05 (m, 4H), 3.73 (s, 3H), 3.26 (s, 2H), 2.93 (d, *J* = 1.1 Hz, 2H), 1.19 (t, *J* = 7.1 Hz, 6H). <sup>13</sup>C NMR (75 MHz, CDCl<sub>3</sub>) δ (ppm) 170.6, 167.6, 136.1, 136.0, 130.1, 129.0, 128.2, 126.9, 61.3, 58.7, 51.9, 39.7, 34.5, 13.9. HRMS (EI+, 70 eV): calcd for C<sub>19</sub>H<sub>24</sub>O<sub>6</sub> [M<sup>+</sup>] 348.1567, found: 348.1567. IR (neat): 2982, 2956, 1726, 1443, 1275, 1189, 1152, 1014, 746, 701 cm<sup>-1</sup>.

Allyl sulfones serves as good radical acceptors and the mechanism for the formation of **9** is based on the reported methods.<sup>[4]</sup> This result together with the TEMPO trapping experiment revealed that the reaction might involve radical pathways and benzylmalonate radical might be the key intermediate.

### 6.3 Light On-off Experiment

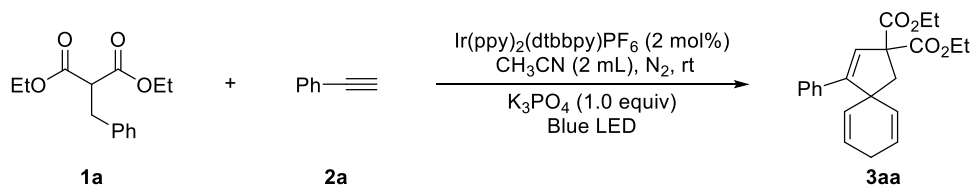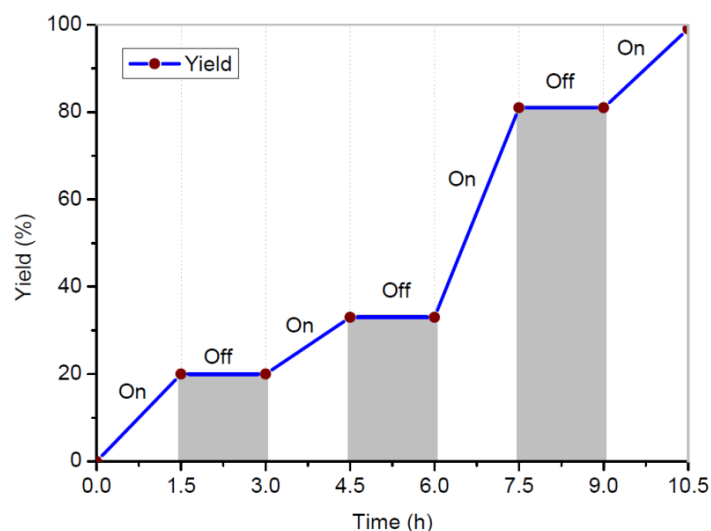

1a (25.0 mg, 0.1 mmol), 2a (20.4 mg, 0.2 mmol), Ir(ppy)<sub>2</sub>(dtbbpy)PF<sub>6</sub> (1.8 mg, 2 mol%), K<sub>3</sub>PO<sub>4</sub> (21.2 mg, 1.0 equiv) and anhydrous CH<sub>3</sub>CN (2 mL) were added to a flame-dried Schlenk tube under nitrogen atmosphere. Then, the reaction mixture was degassed three times via the ‘freeze-pump-thaw’ procedure under a nitrogen atmosphere. Five parallel experiments were carried out and processed individually after the respective on/off irradiation intervals to ensure reproducibility in the sample collection. The reactions were monitored by NMR analysis using 1,3,5-trimethoxybenzene as an internal standard. The reaction mixtures were irradiated (blue LEDs, 455 nm) and subsequently left in the dark at room temperature as indicated in the timeline above.

This result showed that the continuous irradiation of visible light is indispensable and it also indicated that the reaction proceeds mainly through a photoredox catalytic pathway. However, the radical chain propagation pathway could not be ruled out completely.<sup>[5]</sup> Therefore, we further did the quantum yield measurement to gain more insight into the mechanism.

### 6.4 Quantum Yield Measurement

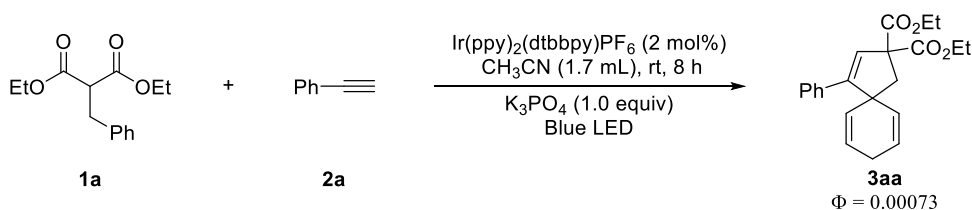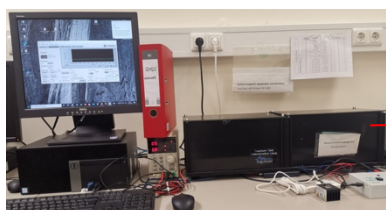

The quantum yield was determined according to the reported method.<sup>[6]</sup> **1a** (25.0 mg, 0.1 mmol), **2a** (20.4 mg, 0.2 mmol), Ir(ppy)<sub>2</sub>(dtbbpy)PF<sub>6</sub> (1.8 mg, 2 mol%), K<sub>3</sub>PO<sub>4</sub> (21.2 mg, 1.0 equiv) and anhydrous CH<sub>3</sub>CN (1.7 mL) were added to a flame-dried Schlenk tube under nitrogen protection. Then, the reaction mixture was degassed for three times via the ‘freeze-pump-thaw’ procedure under nitrogen atmosphere. After stirring for 5 minutes, the reaction mixture was transferred to a quartz cuvette to proceed for 8 h under irradiation of blue LED: N<sub>A</sub> = 6.02214086 × 10<sup>23</sup>; h = 6.62607004 × 10<sup>-34</sup> J·s; c = 3 × 10<sup>8</sup> m/s; c<sub>prod</sub> = 5.9 × 10<sup>-4</sup> mol/L; V = 1.7 mL; λ = 4.5 × 10<sup>-7</sup> m; t = 28800 s; P<sub>ref</sub> = 0.01396 W; P<sub>sample</sub> = 0.00189 W;

$$\Phi = \frac{N_{prod}}{N_{ph,abs}} = N_A \cdot h \cdot c \frac{c_{prod} \cdot V}{P_{abs} \cdot \Delta t \cdot \lambda_{LED}}$$

$$f = \frac{1 + R \frac{P_{sample}}{P_{ref}}}{1 - R} \quad P_{abs} = (P_{ref} - P_{sample})f$$

The value of quantum yield is far less than one ( $\Phi = 0.00073$ ), which showed that this reaction mainly proceed through a photoredox catalytic pathway.

## 6.5 Luminescence Quenching Experiment

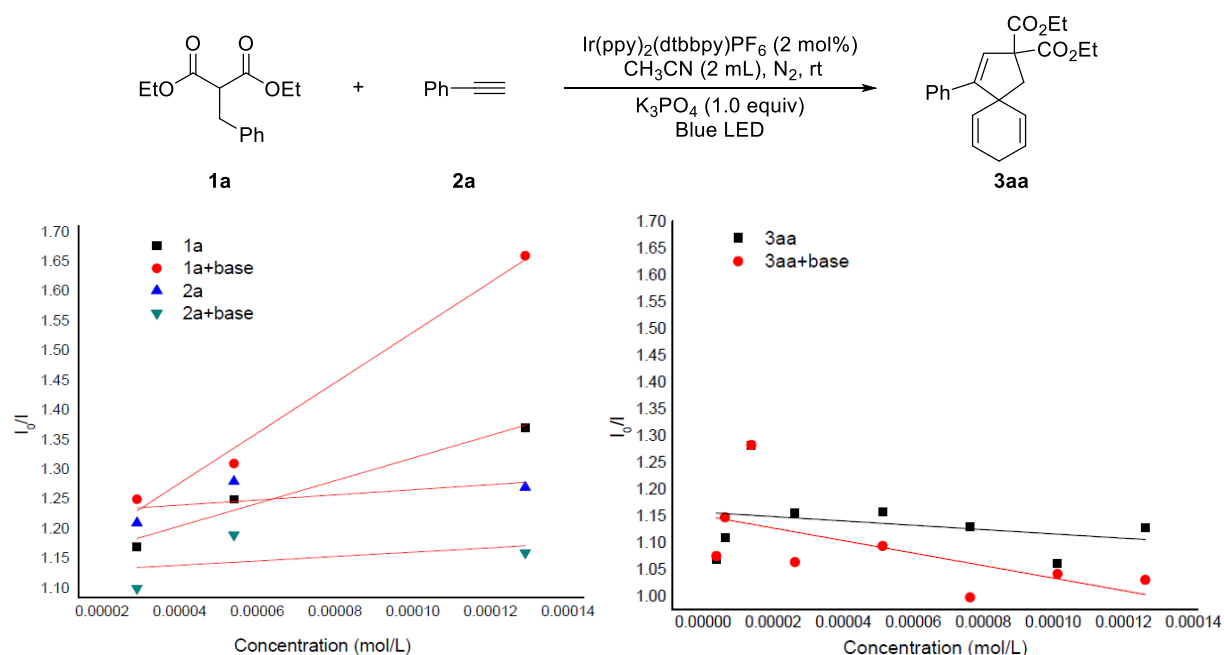

Fluorescence spectra were collected on Cary Eclipse Fluorescence Spectrophotometer. All solutions were excited at 380 nm and the emission intensity at 550 nm was observed. In a typical experiment, the emission spectrum of a  $2.5 \times 10^{-7}$  M solution of Ir(ppy)<sub>2</sub>(dtbbpy)PF<sub>6</sub> in CH<sub>3</sub>CN was collected in the presence and absence of K<sub>3</sub>PO<sub>4</sub> (1.0 equiv). Both diethyl benzylmalonate **1a** and phenylacetylene **2a** could quench the excited state of <sup>\*</sup>[Ir(ppy)<sub>3</sub>(dtbbpy)]<sup>3+</sup>. However, the quenching rate constant of **1a** in the presence of K<sub>3</sub>PO<sub>4</sub> is much higher than others. Moreover, the luminescence quenching experiment of product **3aa** also was performed, which showed a much smaller quenching rate constant at best. X-axis denotes the concentration of **1a**, **2a** or **3aa**. Y-axis denotes the value of I<sub>0</sub>/I (I<sub>0</sub> implies the fluorescence intensity of photocatalyst without addition of quenching agents and I implies the fluorescence intensity of photocatalyst in the presence of quenching agents).

These results suggested that the reaction might undergo an efficient reductive quenching mechanism, in which **1a** might deprotonate first and then be oxidized by the excited state of photocatalyst.

## 7. X-ray Structure of **3ad**

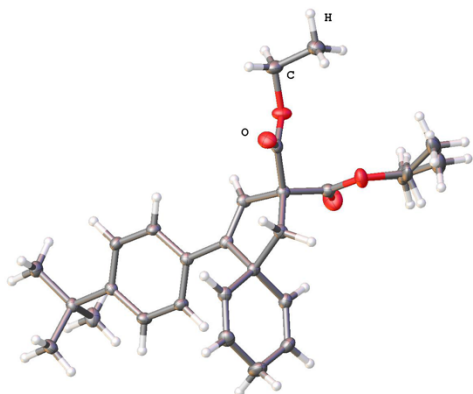

CCDC deposition number 2120296. **Experimental.** Single clear colourless irregular-shaped crystals of **U077** were used as supplied. A suitable crystal with dimensions  $0.10 \times 0.10 \times 0.04 \text{ mm}^3$  was selected and mounted on a MITIGEN holder with inert oil on a XtaLAB Synergy R, DW system, HyPix-Arc 150 diffractometer. The crystal was kept at a steady  $T = 123.00(10) \text{ K}$  during data collection. The structure was solved with the **ShelXT** 2018/2 (Sheldrick, 2018) solution program using dual methods and by using **Olex2** 1.3-alpha (Dolomanov et al., 2009) as the graphical interface. The model was refined with

**ShelXL** 2018/3 (Sheldrick, 2015) using full matrix least squares minimisation on  $F^2$ .

**Crystal Data.**  $\text{C}_{26}\text{H}_{32}\text{O}_4$ ,  $M_r = 408.51$ , monoclinic,  $P2_1/c$  (No. 14),  $a = 10.56390(10) \text{ \AA}$ ,  $b = 21.9239(2) \text{ \AA}$ ,  $c = 10.47960(10) \text{ \AA}$ ,  $\beta = 111.9890(10)^\circ$ ,  $\alpha = \gamma = 90^\circ$ ,  $V = 2250.54(4) \text{ \AA}^3$ ,  $T = 123.00(10) \text{ K}$ ,  $Z = 4$ ,  $Z' = 1$ ,  $\mu(\text{Cu K}\alpha) = 0.635$ , 45358 reflections measured, 4621 unique ( $R_{\text{int}} = 0.0264$ ) which were used in all calculations. The final  $wR_2$  was 0.1059 (all data) and  $R_1$  was 0.0403 ( $I \geq 2 \sigma(I)$ ).

## 8. Computational Studies

The calculations have been run with the Gaussian16 software package employing the M06-2X functional by Truhlar and co-worker and the 6-311+G\*\* basis set to ensure reliable predictions of relative energies.

All structures have been fully optimized using the standard Berny algorithm and the default integrations grid. The obtained structures were then verified to be minimum energy structures by a subsequent frequency analysis using the harmonic oscillator approximation. The calculated values of  $\Delta G$  and  $\Delta H$  remained unscaled but include ZPE corrections and are reported for 298.15K in kcal/mol. To avoid issues arising from calculating separate ions in gasphase the Birch reduction was mimicked by calculating the LiOMe and Lewis-acid base complex of  $[\text{Li} \bullet \text{MeOH}]$ .

The inherent thermodynamic penalty for reducing benzene to 1,4-cyclohexen was estimated by eq. 1.

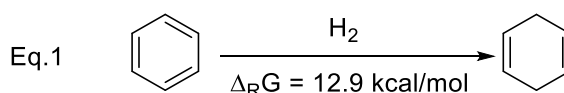

This formal process of course can only be realized by certain reaction conditions like the Birch reduction (Eq. 2), that not only change the pathway and hence overcome the presumably high barriers, but also renders the process from a significantly endergonic to a thermodynamically allowed process ( $\Delta_R G \leq 0$ , eq. 2).

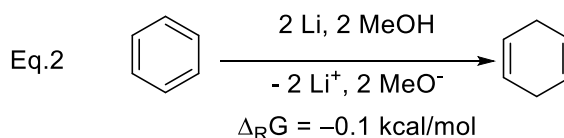

Similarly, the title reaction (Eq.3) is a process that is thermodynamically allowed but lacks a significant driving force. To still obtain the product in high yields the reaction design requires the inclusion of irreversible steps. In this specific case both, the reduction of the radical **2a-II** (see main text) by the reduced PC and the protonation of the resulting anion **2a-III** can be in principle considered as irreversible. Confirmation of these irreversible steps was sought in two ways: a) by subjecting product **3aa** to the catalysis conditions. Here no reaction of the **3aa** was observed. b) Addressing the interaction of product, PC\* a Stern-Vollmer-plot was recorded, indicating insignificant quenching of the PC excited state by **3aa** (see part 6.5).

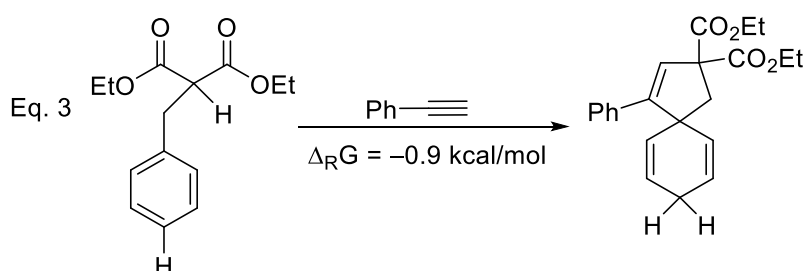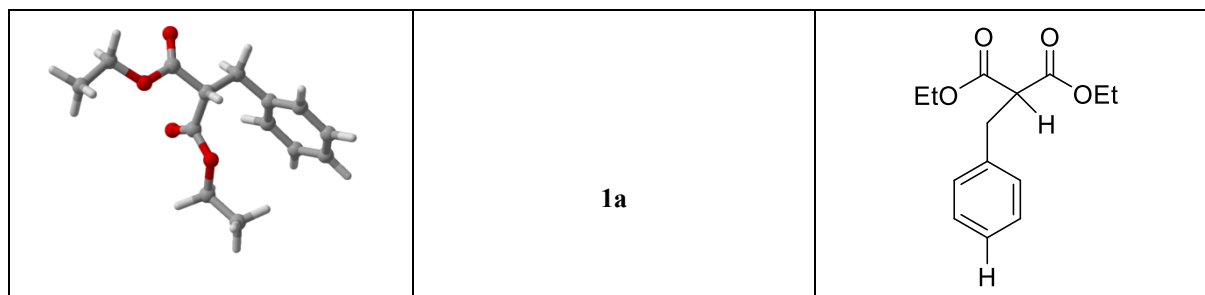

#### xyz matrix

|   |             |             |             |
|---|-------------|-------------|-------------|
| C | -0.40726200 | 0.65178900  | 0.43285100  |
| C | -0.76359900 | -0.64907900 | -0.26354500 |
| O | -0.70160300 | 0.90754600  | 1.56965200  |
| C | -2.21420100 | -1.00341200 | 0.00527300  |
| O | -2.59345200 | -2.03292700 | 0.49006000  |
| C | 0.18247700  | -1.75105800 | 0.25448600  |
| H | -0.63502000 | -0.50713000 | -1.33948500 |
| C | 1.62833300  | -1.34930800 | 0.09508600  |
| C | 2.28520100  | -1.51712700 | -1.12395200 |
| C | 3.59163900  | -1.07280100 | -1.29512900 |
| C | 4.25997200  | -0.44989400 | -0.24501200 |
| C | 3.61549800  | -0.28068000 | 0.97641700  |
| C | 2.30885200  | -0.72947700 | 1.14432500  |
| H | 5.27853800  | -0.10431300 | -0.37641000 |



|   |             |             |             |
|---|-------------|-------------|-------------|
| O | 0.35784000  | 1.41930400  | -0.34155200 |
| C | 2.08648400  | 3.01265000  | -0.63260200 |
| C | 0.99279600  | 2.54054600  | 0.29741400  |
| O | -3.02417600 | -0.01732800 | -0.39153500 |
| C | -5.14806500 | 1.02082000  | -0.62692600 |
| C | -4.42777000 | -0.21847200 | -0.14844000 |
| H | -0.05346500 | -1.93153600 | 1.30500800  |
| H | -0.03232700 | -2.67261300 | -0.28957300 |
| H | 1.76681900  | -1.99996800 | -1.94673400 |
| H | 4.08924400  | -1.21377100 | -2.24747400 |
| H | 4.13152100  | 0.19632900  | 1.80178700  |
| H | 1.80511800  | -0.59283900 | 2.09652100  |
| H | 2.61400800  | 3.85823100  | -0.18753600 |
| H | 2.79934600  | 2.20378400  | -0.80537200 |
| H | 1.67162800  | 3.32681200  | -1.59141100 |
| H | 0.23887900  | 3.30769900  | 0.48675600  |
| H | 1.39112700  | 2.20696100  | 1.25784300  |
| H | -6.22096500 | 0.91201400  | -0.45944100 |
| H | -4.79882900 | 1.89980300  | -0.08383900 |
| H | -4.97754600 | 1.17849600  | -1.69277400 |
| H | -4.74837900 | -1.11556400 | -0.68213100 |
| H | -4.57069400 | -0.39213400 | 0.91977500  |

#### Thermodynamic data

|                                              |                             |
|----------------------------------------------|-----------------------------|
| Zero-point correction=                       | 0.302416 (Hartree/Particle) |
| Thermal correction to Energy=                | 0.320751                    |
| Thermal correction to Enthalpy=              | 0.321695                    |
| Thermal correction to Gibbs Free Energy=     | 0.253732                    |
| Sum of electronic and zero-point Energies=   | -844.841232                 |
| Sum of electronic and thermal Energies=      | -844.822897                 |
| Sum of electronic and thermal Enthalpies=    | -844.821952                 |
| Sum of electronic and thermal Free Energies= | -844.889916                 |

|       | E (Thermal) | CV             | S              |
|-------|-------------|----------------|----------------|
|       | KCal/Mol    | Cal/Mol-Kelvin | Cal/Mol-Kelvin |
| Total | 201.274     | 66.358         | 143.041        |

|                                                                                     |           |              |
|-------------------------------------------------------------------------------------|-----------|--------------|
| 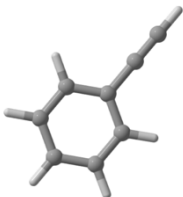 | <b>2a</b> | Ph— $\equiv$ |
|-------------------------------------------------------------------------------------|-----------|--------------|

xyz matrix

|   |             |             |             |
|---|-------------|-------------|-------------|
| C | 2.02017900  | 0.00033600  | -0.00001200 |
| C | 3.22199400  | -0.00012100 | -0.00000100 |
| C | 0.58609700  | 0.00014100  | -0.00000500 |
| C | -0.11896800 | 1.20882600  | -0.00000300 |
| C | -1.50739300 | 1.20473400  | 0.00000200  |
| C | -2.20412600 | -0.00016700 | 0.00000500  |
| C | -1.50713500 | -1.20491700 | 0.00000200  |
| C | -0.11870800 | -1.20869900 | -0.00000200 |
| H | 4.28580900  | -0.00045200 | 0.00007600  |
| H | 0.43136800  | 2.14157800  | -0.00000400 |
| H | -2.04680000 | 2.14424700  | 0.00000400  |
| H | -3.28750900 | -0.00028500 | 0.00000900  |
| H | -2.04634000 | -2.14454700 | 0.00000400  |
| H | 0.43182600  | -2.14133200 | -0.00000500 |

#### Thermodynamic data

|                                              |                             |
|----------------------------------------------|-----------------------------|
| Zero-point correction=                       | 0.110396 (Hartree/Particle) |
| Thermal correction to Energy=                | 0.116770                    |
| Thermal correction to Enthalpy=              | 0.117714                    |
| Thermal correction to Gibbs Free Energy=     | 0.080000                    |
| Sum of electronic and zero-point Energies=   | -308.227101                 |
| Sum of electronic and thermal Energies=      | -308.220728                 |
| Sum of electronic and thermal Enthalpies=    | -308.219784                 |
| Sum of electronic and thermal Free Energies= | -308.257497                 |

|       | E (Thermal) | CV             | S              |
|-------|-------------|----------------|----------------|
|       | KCal/Mol    | Cal/Mol-Kelvin | Cal/Mol-Kelvin |
| Total | 73.274      | 24.879         | 79.375         |

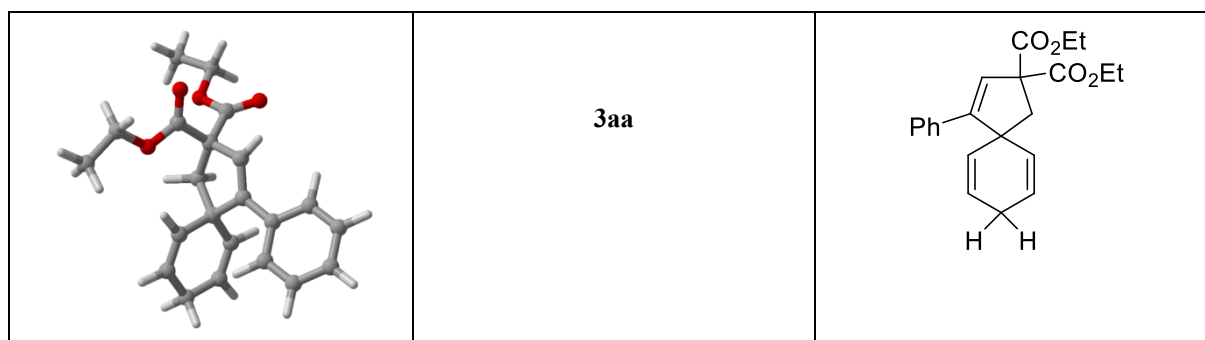

#### xyz matrix

|   |             |            |             |
|---|-------------|------------|-------------|
| C | -1.49359900 | 0.15145400 | -2.19939200 |
| C | -2.25780500 | 0.99599700 | -2.88341300 |
| C | -2.52978300 | 2.40526800 | -2.44780700 |
| C | -1.83070800 | 2.76056900 | -1.16877500 |
| C | -1.07886400 | 1.90855400 | -0.47845200 |

|   |             |             |             |
|---|-------------|-------------|-------------|
| C | -0.77921300 | 0.49010600  | -0.91436000 |
| C | 0.76184200  | 0.29202200  | -1.07827500 |
| C | 1.26472400  | -0.44528600 | 0.18651200  |
| C | -0.00875900 | -0.98727400 | 0.78786400  |
| C | -1.10952600 | -0.52107400 | 0.19370000  |
| H | -2.23681100 | 3.10440300  | -3.24076000 |
| H | -3.61255400 | 2.54989800  | -2.32947000 |
| C | -2.48553600 | -0.94294200 | 0.52912500  |
| C | -3.58291700 | -0.09256400 | 0.35606700  |
| C | -4.86430600 | -0.51380900 | 0.69349200  |
| C | -5.07497000 | -1.79261600 | 1.19720400  |
| C | -3.99331700 | -2.65399700 | 1.35616200  |
| C | -2.71320000 | -2.23492300 | 1.02015900  |
| C | 1.97432200  | 0.40965800  | 1.23611900  |
| O | 2.68946300  | -0.05205800 | 2.08392400  |
| O | 1.66659200  | 1.70567600  | 1.14944100  |
| C | 1.72360300  | 3.95521100  | 1.90904500  |
| C | 2.23498900  | 2.55554100  | 2.16256000  |
| C | 2.22716400  | -1.57091200 | -0.17799300 |
| O | 2.00896900  | -2.74145500 | -0.04046000 |
| O | 3.34649700  | -1.07256400 | -0.71503500 |
| C | 5.54059700  | -1.26494100 | -1.60618500 |
| C | 4.35571400  | -2.03397700 | -1.06899500 |
| H | -1.34863400 | -0.86380000 | -2.56106000 |
| H | -2.72843900 | 0.66305000  | -3.80342100 |
| H | -1.96970900 | 3.77038400  | -0.79366200 |
| H | -0.60390600 | 2.22182800  | 0.44503400  |
| H | 0.94006200  | -0.34730800 | -1.94629800 |
| H | 1.27833000  | 1.23543200  | -1.24751900 |
| H | 0.02326000  | -1.67682200 | 1.62202800  |
| H | -3.43120900 | 0.90705600  | -0.02999100 |
| H | -5.70174900 | 0.16116400  | 0.56078100  |
| H | -6.07513600 | -2.11967700 | 1.45553200  |
| H | -4.14852300 | -3.65870500 | 1.73125300  |
| H | -1.87939700 | -2.92129200 | 1.11367900  |
| H | 2.14914900  | 4.64238700  | 2.64226200  |
| H | 2.00596800  | 4.29299100  | 0.91088900  |
| H | 0.63634400  | 3.99098500  | 1.99430600  |
| H | 1.93707600  | 2.17605700  | 3.14177300  |
| H | 3.32280500  | 2.49364500  | 2.09456700  |
| H | 6.33464700  | -1.95892000 | -1.88717500 |
| H | 5.25796200  | -0.68645900 | -2.48687000 |
| H | 5.92812400  | -0.58195700 | -0.84921800 |
| H | 4.60855100  | -2.61067900 | -0.17722300 |

H 3.93890200 -2.72084300 -1.80858000

#### Thermodynamic data

Zero-point correction= 0.417560 (Hartree/Particle)  
 Thermal correction to Energy= 0.442303  
 Thermal correction to Enthalpy= 0.443247  
 Thermal correction to Gibbs Free Energy= 0.360048  
 Sum of electronic and zero-point Energies= -1153.091336  
 Sum of electronic and thermal Energies= -1153.066593  
 Sum of electronic and thermal Enthalpies= -1153.065649  
 Sum of electronic and thermal Free Energies= -1153.148848

|       | E (Thermal)<br>KCal/Mol | CV<br>Cal/Mol-Kelvin | S<br>Cal/Mol-Kelvin |
|-------|-------------------------|----------------------|---------------------|
| Total | 277.549                 | 93.050               | 175.107             |

|  |         |                                                                                     |
|--|---------|-------------------------------------------------------------------------------------|
|  | benzene |  |
|--|---------|-------------------------------------------------------------------------------------|

#### xyz matrix

|   |             |             |            |
|---|-------------|-------------|------------|
| C | 0.00000000  | 1.39166700  | 0.00000000 |
| C | 1.20521900  | 0.69583400  | 0.00000000 |
| C | 1.20521900  | -0.69583400 | 0.00000000 |
| C | 0.00000000  | -1.39166700 | 0.00000000 |
| C | -1.20521900 | -0.69583400 | 0.00000000 |
| C | -1.20521900 | 0.69583400  | 0.00000000 |
| H | 0.00000000  | 2.47537700  | 0.00000000 |
| H | 2.14374000  | 1.23768900  | 0.00000000 |
| H | 2.14374000  | -1.23768900 | 0.00000000 |
| H | 0.00000000  | -2.47537700 | 0.00000000 |
| H | -2.14374000 | -1.23768900 | 0.00000000 |
| H | -2.14374000 | 1.23768900  | 0.00000000 |

#### Thermodynamic data

Zero-point correction= 0.101092 (Hartree/Particle)  
 Thermal correction to Energy= 0.105478  
 Thermal correction to Enthalpy= 0.106422  
 Thermal correction to Gibbs Free Energy= 0.075980  
 Sum of electronic and zero-point Energies= -232.097257  
 Sum of electronic and thermal Energies= -232.092870  
 Sum of electronic and thermal Enthalpies= -232.091926  
 Sum of electronic and thermal Free Energies= -232.122368

|       | E (Thermal) | CV             | S              |
|-------|-------------|----------------|----------------|
|       | KCal/Mol    | Cal/Mol-Kelvin | Cal/Mol-Kelvin |
| Total | 66.189      | 17.070         | 64.071         |

|                                                                                   |                    |                                                                                     |
|-----------------------------------------------------------------------------------|--------------------|-------------------------------------------------------------------------------------|
| 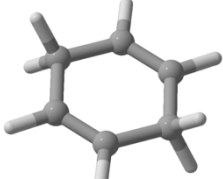 | 1,4-cyclohexadiene |  |
|-----------------------------------------------------------------------------------|--------------------|-------------------------------------------------------------------------------------|

#### xyz matrix

|   |             |             |             |
|---|-------------|-------------|-------------|
| C | 0.66460400  | -1.25146000 | -0.00003600 |
| C | -0.66460700 | -1.25145900 | -0.00003600 |
| C | -1.49670300 | 0.00000100  | 0.00006300  |
| C | -0.66460400 | 1.25146000  | -0.00003600 |
| C | 0.66460700  | 1.25145900  | -0.00003600 |
| C | 1.49670300  | -0.00000100 | 0.00006300  |
| H | 1.19853200  | -2.19701400 | -0.00022000 |
| H | -1.19853700 | -2.19701200 | -0.00021800 |
| H | -2.16477700 | 0.00000200  | -0.87046700 |
| H | -2.16432800 | 0.00000200  | 0.87095800  |
| H | -1.19853300 | 2.19701400  | -0.00021900 |
| H | 1.19853700  | 2.19701200  | -0.00022000 |
| H | 2.16477900  | -0.00000200 | -0.87046500 |
| H | 2.16432600  | -0.00000200 | 0.87096000  |

#### Thermodynamic data

|                                              |                             |
|----------------------------------------------|-----------------------------|
| Zero-point correction=                       | 0.122947 (Hartree/Particle) |
| Thermal correction to Energy=                | 0.128238                    |
| Thermal correction to Enthalpy=              | 0.129182                    |
| Thermal correction to Gibbs Free Energy=     | 0.094339                    |
| Sum of electronic and zero-point Energies=   | -233.242826                 |
| Sum of electronic and thermal Energies=      | -233.237536                 |
| Sum of electronic and thermal Enthalpies=    | -233.236591                 |
| Sum of electronic and thermal Free Energies= | -233.271434                 |

|       | E (Thermal) | CV             | S              |
|-------|-------------|----------------|----------------|
|       | KCal/Mol    | Cal/Mol-Kelvin | Cal/Mol-Kelvin |
| Total | 80.470      | 19.997         | 73.332         |

|  |                |  |
|--|----------------|--|
|  | H <sub>2</sub> |  |
|--|----------------|--|

#### xyz matrix

|   |            |            |             |
|---|------------|------------|-------------|
| H | 0.00000000 | 0.00000000 | 0.36774000  |
| H | 0.00000000 | 0.00000000 | -0.36774000 |

#### Thermodynamic data

|                                              |                             |
|----------------------------------------------|-----------------------------|
| Zero-point correction=                       | 0.010467 (Hartree/Particle) |
| Thermal correction to Energy=                | 0.012827                    |
| Thermal correction to Enthalpy=              | 0.013771                    |
| Thermal correction to Gibbs Free Energy=     | -0.001002                   |
| Sum of electronic and zero-point Energies=   | -1.122024                   |
| Sum of electronic and thermal Energies=      | -1.119664                   |
| Sum of electronic and thermal Enthalpies=    | -1.118720                   |
| Sum of electronic and thermal Free Energies= | -1.133493                   |

|       | E (Thermal) | CV             | S              |
|-------|-------------|----------------|----------------|
|       | KCal/Mol    | Cal/Mol-Kelvin | Cal/Mol-Kelvin |
| Total | 8.049       | 4.968          | 31.093         |

|                                                                                    |             |  |
|------------------------------------------------------------------------------------|-------------|--|
| 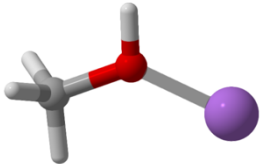 | [MeOH • Li] |  |
|------------------------------------------------------------------------------------|-------------|--|

#### xyz matrix

|    |             |             |             |
|----|-------------|-------------|-------------|
| C  | -0.95584500 | 0.19543500  | 0.00002900  |
| H  | -0.87481600 | 1.28047100  | 0.00027900  |
| H  | -1.48785700 | -0.12700700 | 0.89586000  |
| H  | -1.48790200 | -0.12662200 | -0.89591400 |
| O  | 0.38304400  | -0.31747200 | -0.00013600 |
| H  | 0.37937100  | -1.28286000 | 0.00042500  |
| Li | 2.04730600  | 0.54106300  | 0.00008900  |

#### Thermodynamic data

|                                              |                             |
|----------------------------------------------|-----------------------------|
| Zero-point correction=                       | 0.053236 (Hartree/Particle) |
| Thermal correction to Energy=                | 0.058241                    |
| Thermal correction to Enthalpy=              | 0.059185                    |
| Thermal correction to Gibbs Free Energy=     | 0.026492                    |
| Sum of electronic and zero-point Energies=   | -123.152289                 |
| Sum of electronic and thermal Energies=      | -123.147285                 |
| Sum of electronic and thermal Enthalpies=    | -123.146340                 |
| Sum of electronic and thermal Free Energies= | -123.179034                 |

|  | E (Thermal) | CV             | S              |
|--|-------------|----------------|----------------|
|  | KCal/Mol    | Cal/Mol-Kelvin | Cal/Mol-Kelvin |

|       |        |        |        |
|-------|--------|--------|--------|
| Total | 36.547 | 13.998 | 68.809 |
|-------|--------|--------|--------|

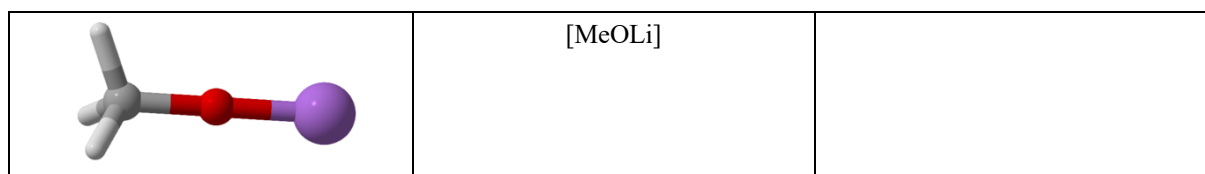

#### xyz matrix

|    |             |             |             |
|----|-------------|-------------|-------------|
| C  | 0.93106400  | -0.00002400 | 0.00005000  |
| H  | 1.34945400  | 0.67958200  | 0.76104800  |
| H  | 1.35008600  | 0.31925500  | -0.96873900 |
| H  | 1.34963700  | -0.99875600 | 0.20817800  |
| O  | -0.44256600 | 0.00001100  | -0.00015500 |
| Li | -2.03167700 | -0.00000800 | 0.00015000  |

#### Thermodynamic data

|                                              |                             |
|----------------------------------------------|-----------------------------|
| Zero-point correction=                       | 0.041644 (Hartree/Particle) |
| Thermal correction to Energy=                | 0.045790                    |
| Thermal correction to Enthalpy=              | 0.046735                    |
| Thermal correction to Gibbs Free Energy=     | 0.017151                    |
| Sum of electronic and zero-point Energies=   | -122.615529                 |
| Sum of electronic and thermal Energies=      | -122.611383                 |
| Sum of electronic and thermal Enthalpies=    | -122.610439                 |
| Sum of electronic and thermal Free Energies= | -122.640022                 |

|       |             |                |                |
|-------|-------------|----------------|----------------|
|       | E (Thermal) | CV             | S              |
|       | KCal/Mol    | Cal/Mol-Kelvin | Cal/Mol-Kelvin |
| Total | 28.734      | 11.093         | 62.264         |

## 9. References

- [1] W. L. F. Armarego, Purification of laboratory chemicals, Eighth edition; Butterworth-Heinemann: Kidlington, Oxford, United Kingdom, Cambridge, MA, 2017.
- [2] A. S. Sarac, S. E. Ozgul, H. Faltz, A. Gencturk, H. D. Gilsing, B. Schulz, *J. Nanosci. Nanotechnol.* **2010**, *10*, 8043-8053.
- [3] a) N. Wurzer, U. Klimczak, T. Babl, S. Fischer, R. A. Angnes, D. Kreutzer, A. Pattanaik, J. Rehbein, O. Reiser, *ACS Catal.* **2021**, *11*, 12019-12028; b) C. Song, X. Dong, Z. Wang, K. Liu, C. W. Chiang, A. Lei, *Angew. Chem. Int. Ed.* **2019**, *58*, 12206-12210. c) Z. F. Xu, H. Dai, L. Shan, C. Y. Li, *Org. Lett.* **2018**, *20*, 1054-1057.
- [4] a) L. Qi, Y. Chen, *Angew. Chem. Int. Ed.* **2016**, *55*, 13312-13315; b) J. Zhang, Y. Li, F. Zhang, C. Hu, Y. Chen, *Angew. Chem. Int. Ed.* **2016**, *55*, 1872-1875; c) Q. Q. Zhao, J. Chen, D. M. Yan, J. R. Chen, W. J. Xiao, *Org. Lett.* **2017**, *19*, 3620-3623;
- [5] M. A. Cismesia, T. P. Yoon, *Chem. Sci.* **2015**, *6*, 5426-5434.
- [6] U. Megerle, R. Lechner, B. König, E. Riedle, *Photochem. Photobiol. Sci.* **2010**, *9*, 1400-1406.

## 10. NMR Spectra

$^1\text{H}$  NMR (300 MHz,  $\text{CDCl}_3$ ) and  $^{13}\text{C}$  NMR (75 MHz,  $\text{CDCl}_3$ ) spectra of product **3aa**

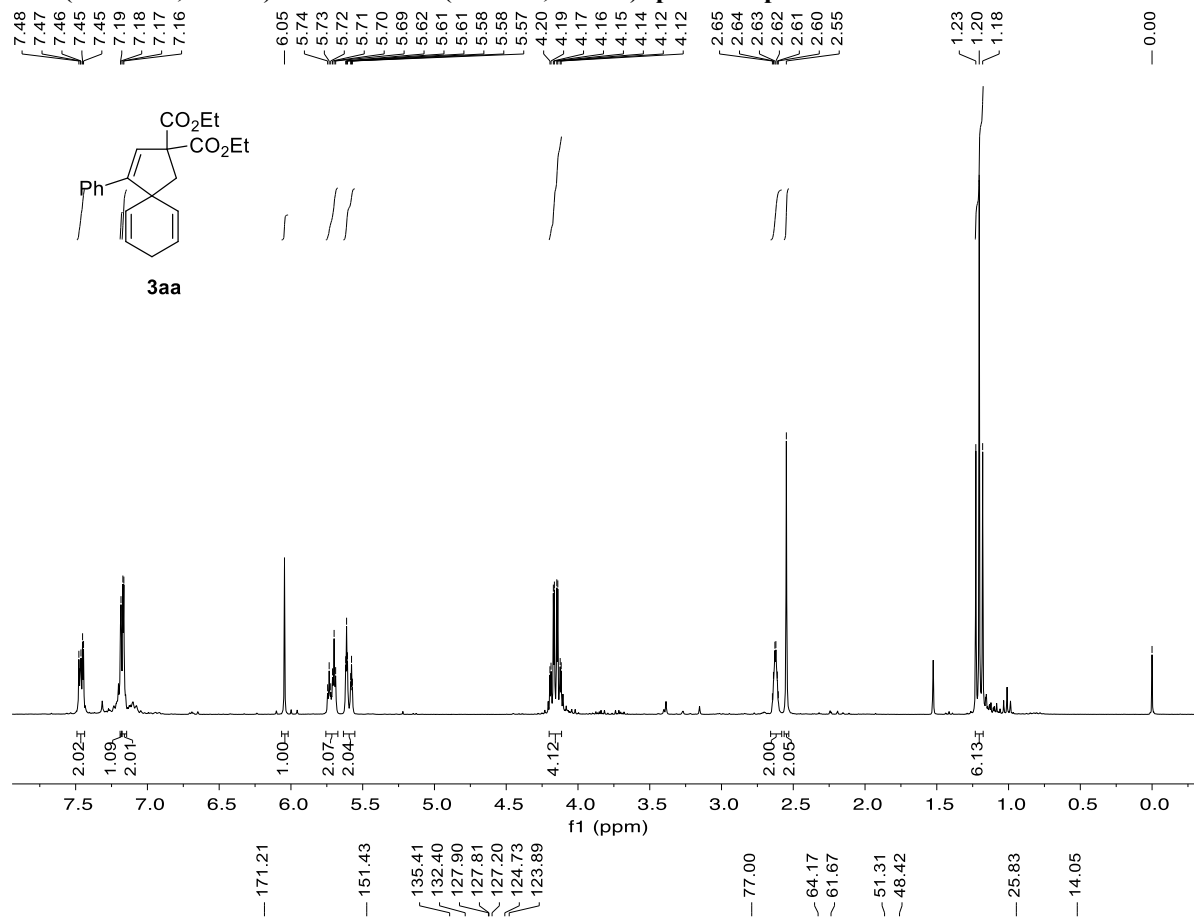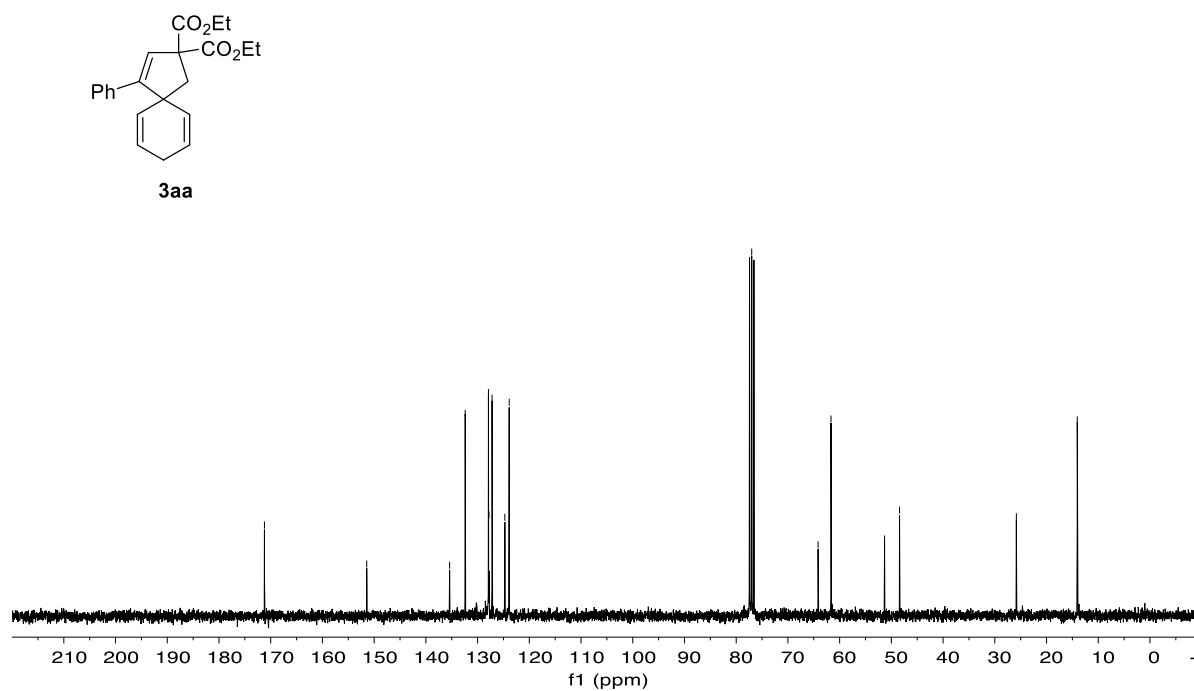



**<sup>1</sup>H NMR (300 MHz, CDCl<sub>3</sub>) and <sup>13</sup>C NMR (75 MHz, CDCl<sub>3</sub>) spectra of product 3ba**

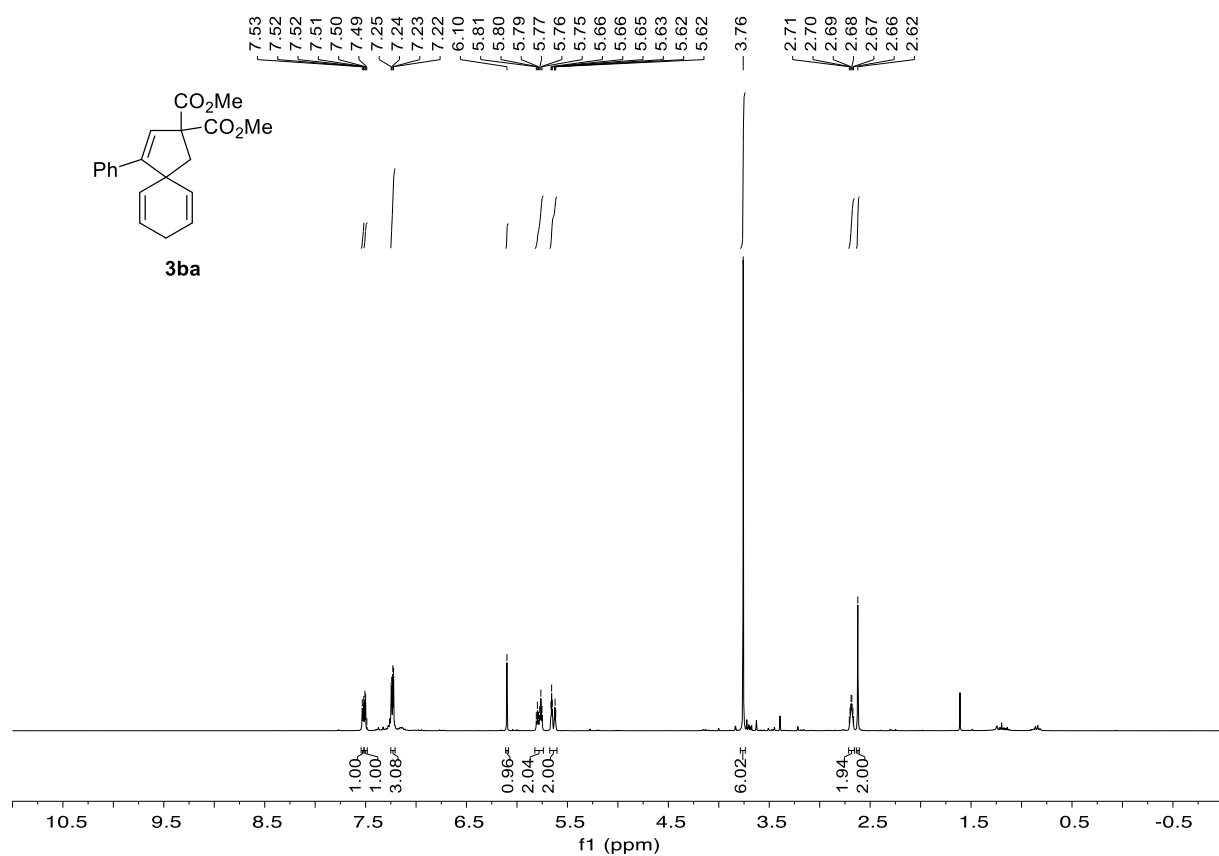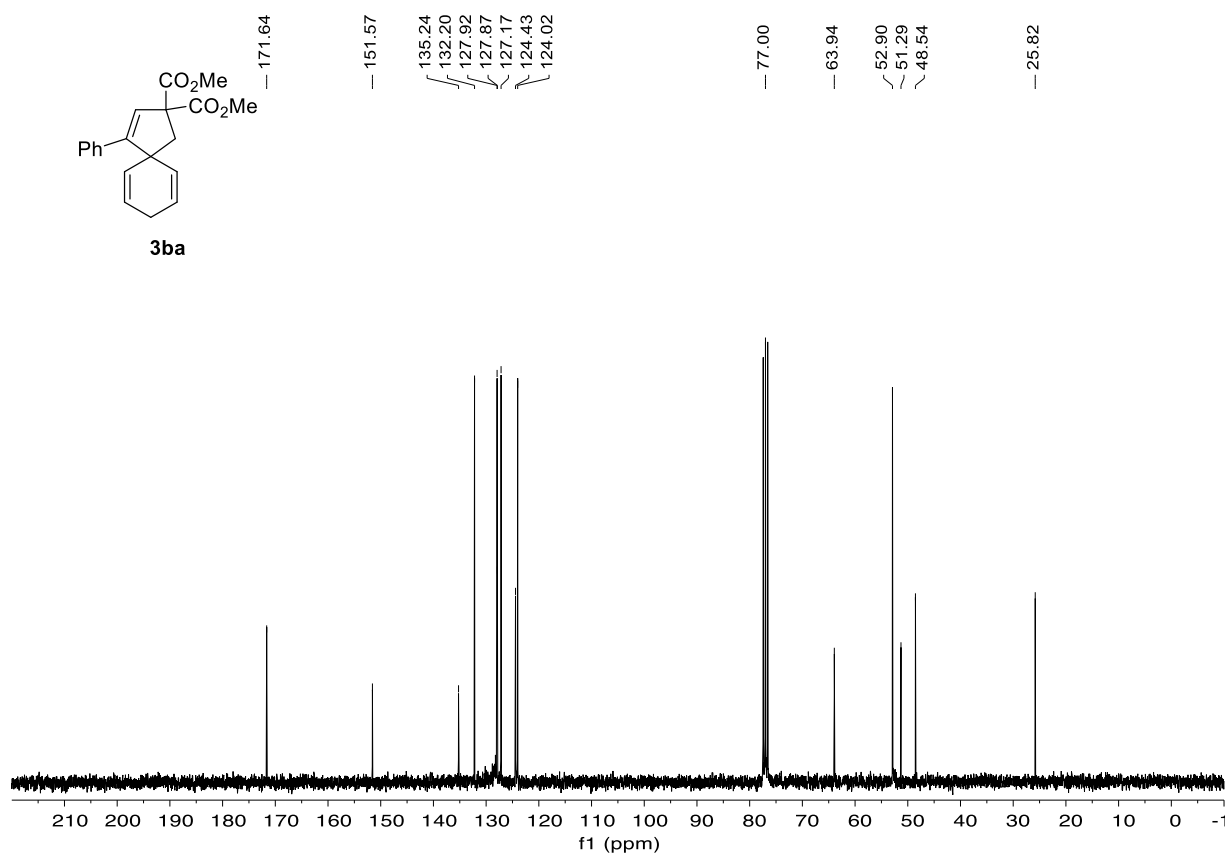

**<sup>1</sup>H NMR (300 MHz, CDCl<sub>3</sub>) and <sup>13</sup>C NMR (100 MHz, CDCl<sub>3</sub>) spectra of product 3ca**

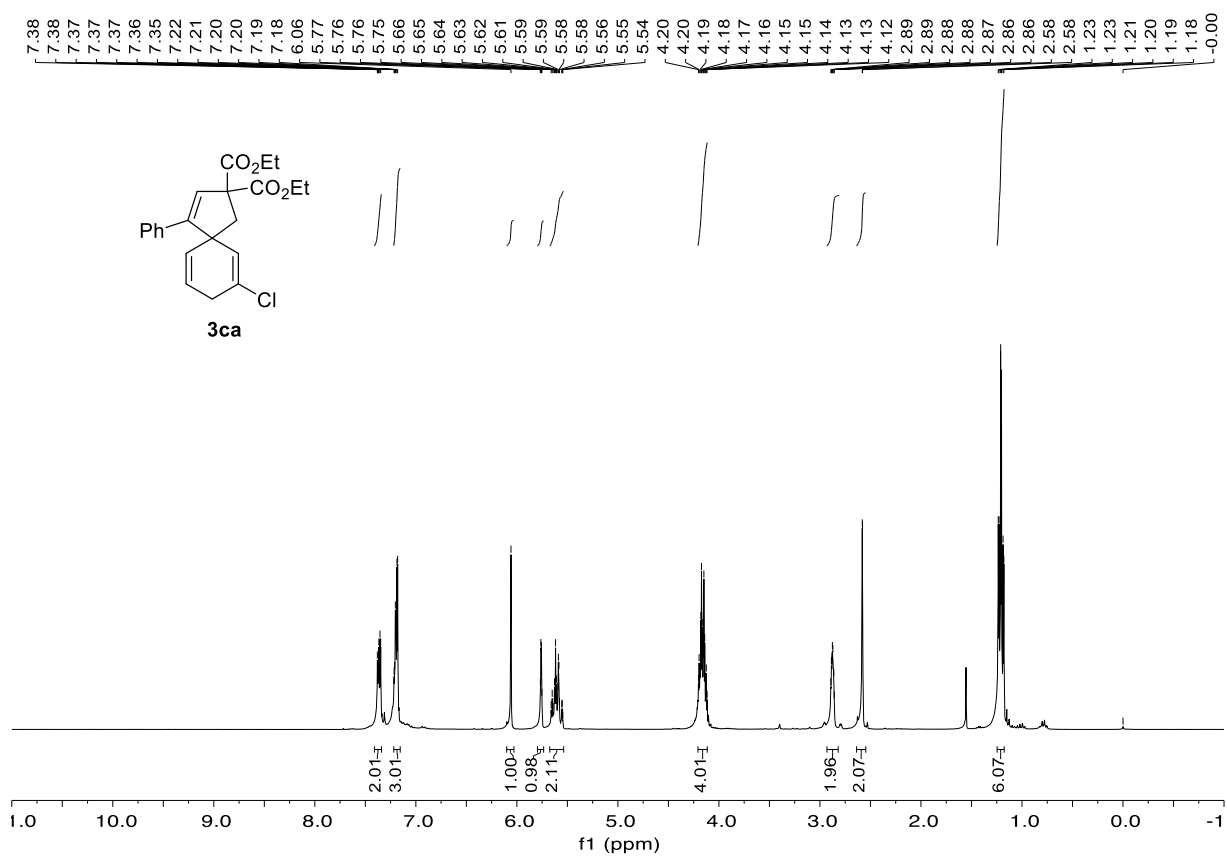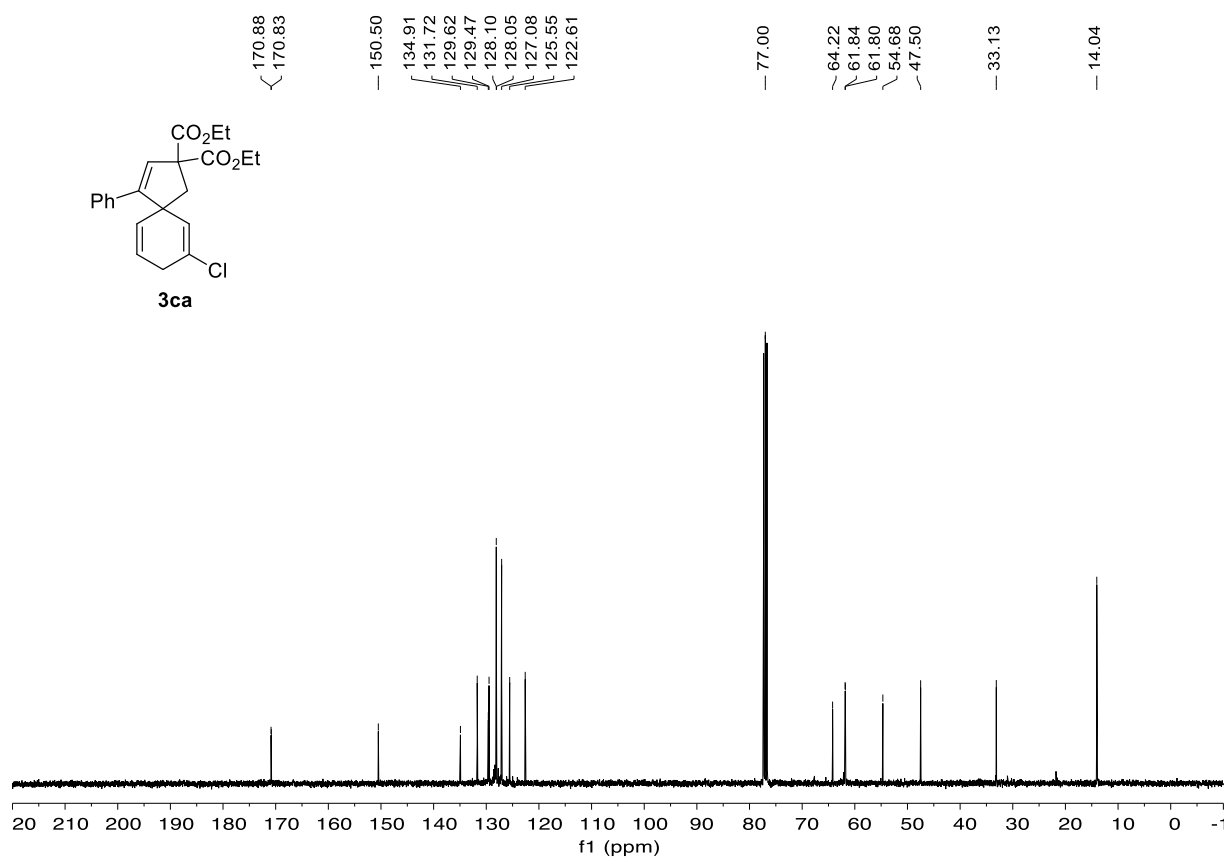

**<sup>1</sup>H NMR (300 MHz, CDCl<sub>3</sub>) and <sup>13</sup>C NMR (75 MHz, CDCl<sub>3</sub>) spectra of product 3da**

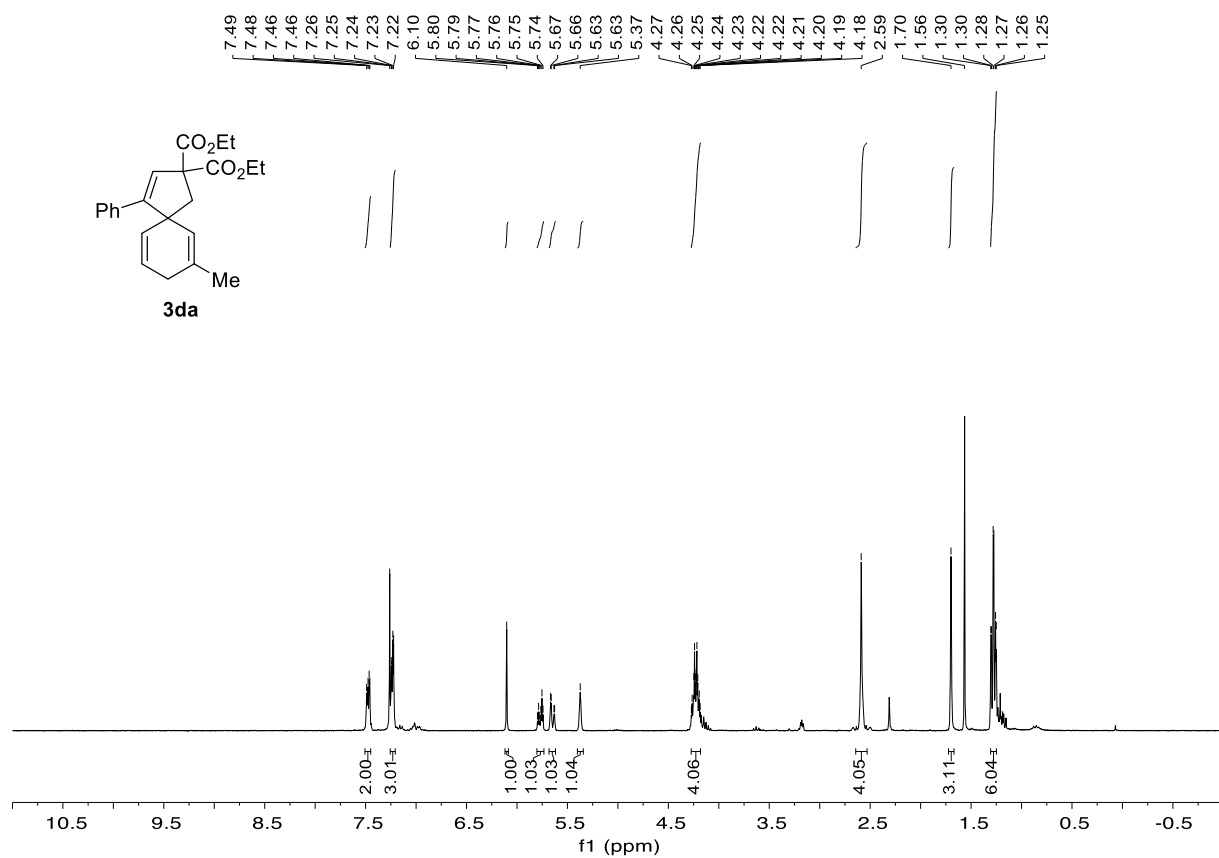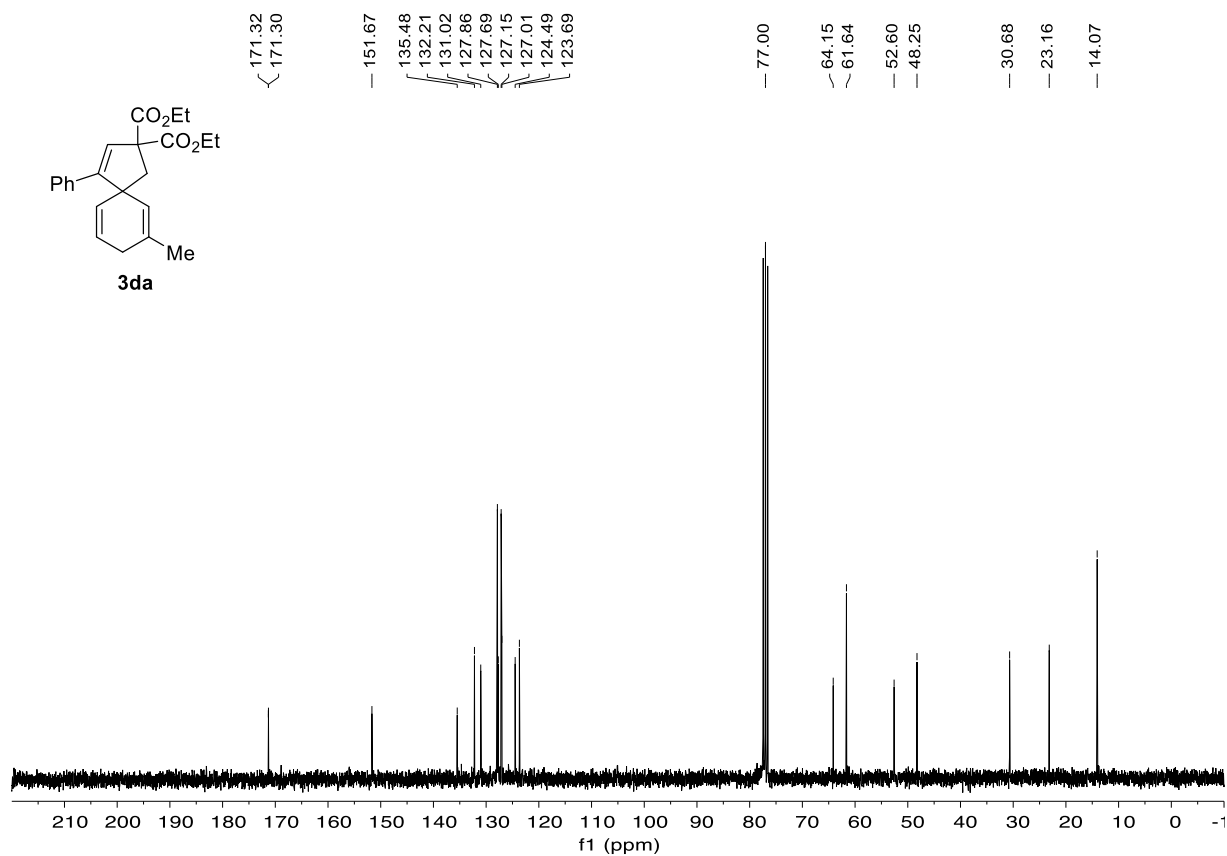

**<sup>1</sup>H NMR (300 MHz, CDCl<sub>3</sub>) and <sup>13</sup>C NMR (75 MHz, CDCl<sub>3</sub>) spectra of product 3ea**

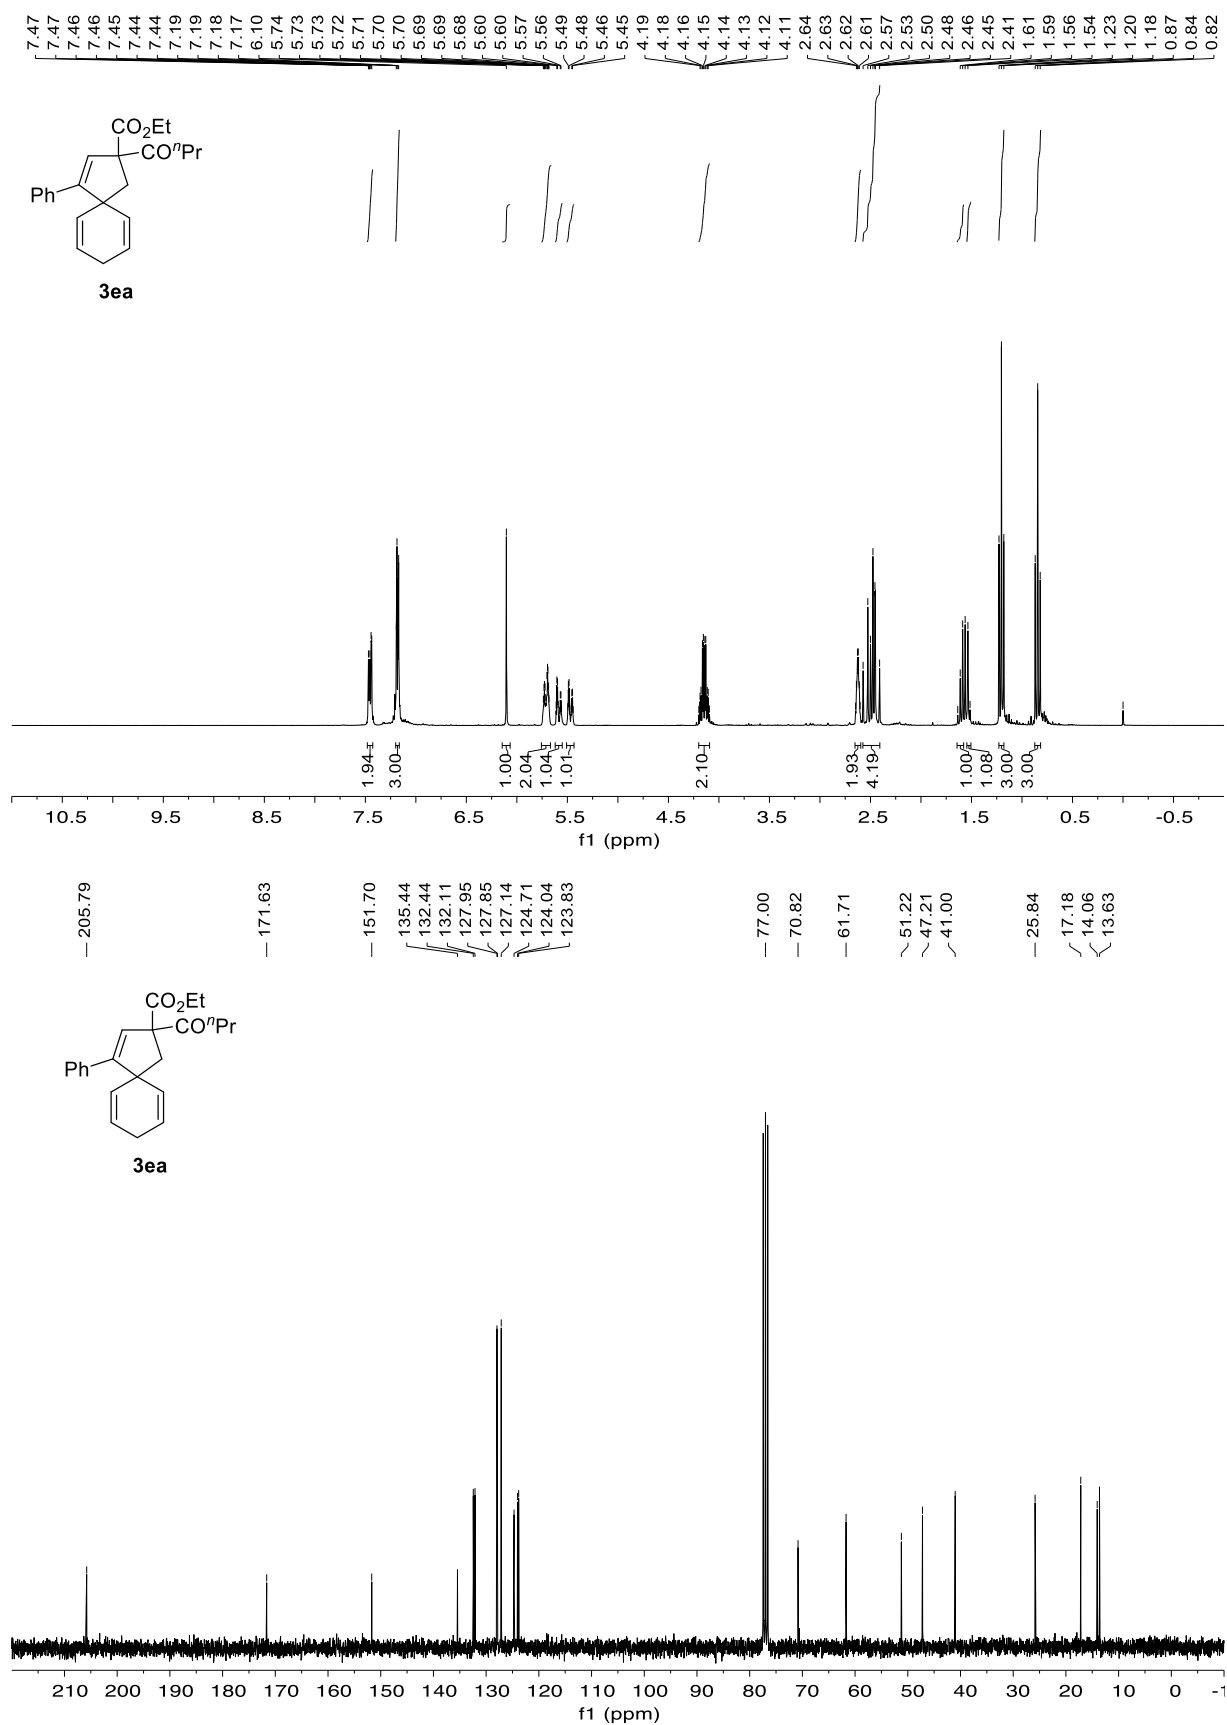

**<sup>1</sup>H NMR (300 MHz, CDCl<sub>3</sub>) and <sup>13</sup>C NMR (75 MHz, CDCl<sub>3</sub>) spectra of product 3fa**

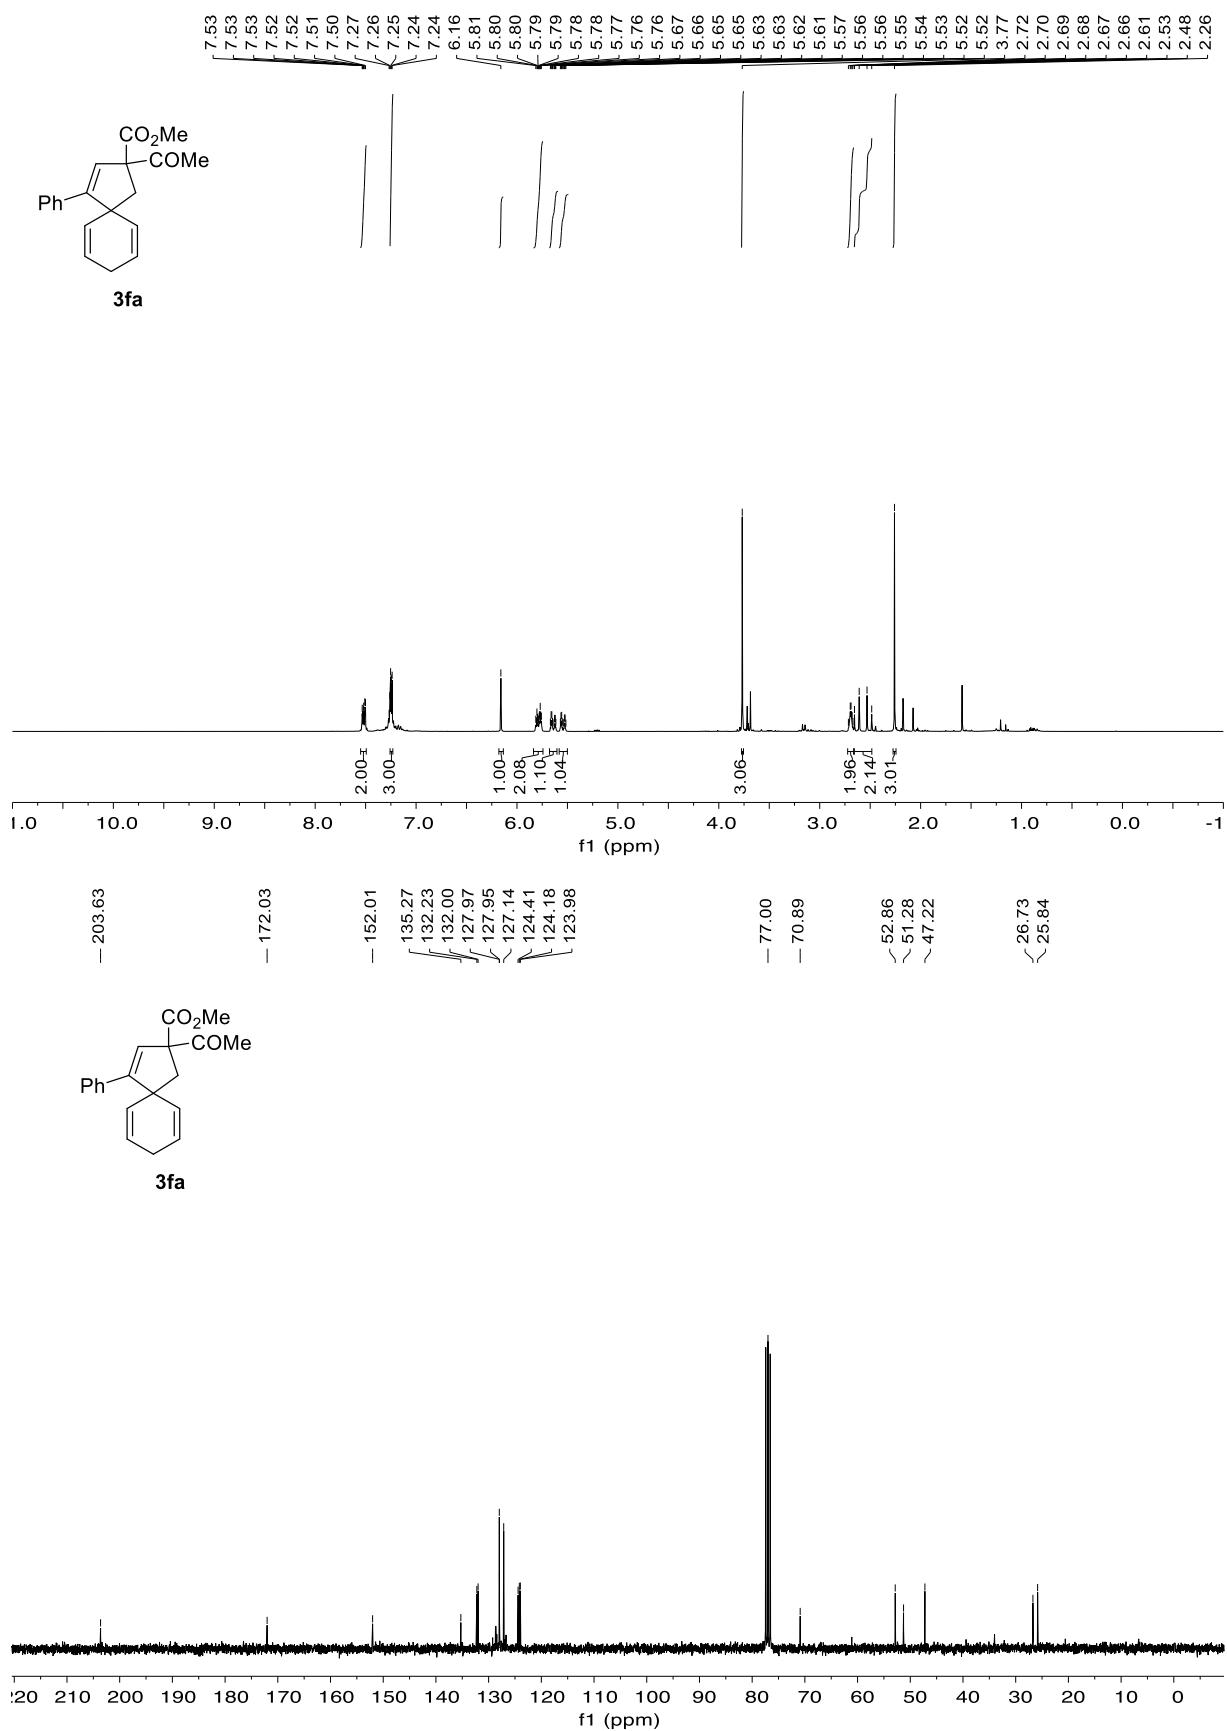

**$^1\text{H}$  NMR (400 MHz,  $\text{CDCl}_3$ ) and  $^{13}\text{C}$  NMR (100 MHz,  $\text{CDCl}_3$ ) spectra of product 3ab**

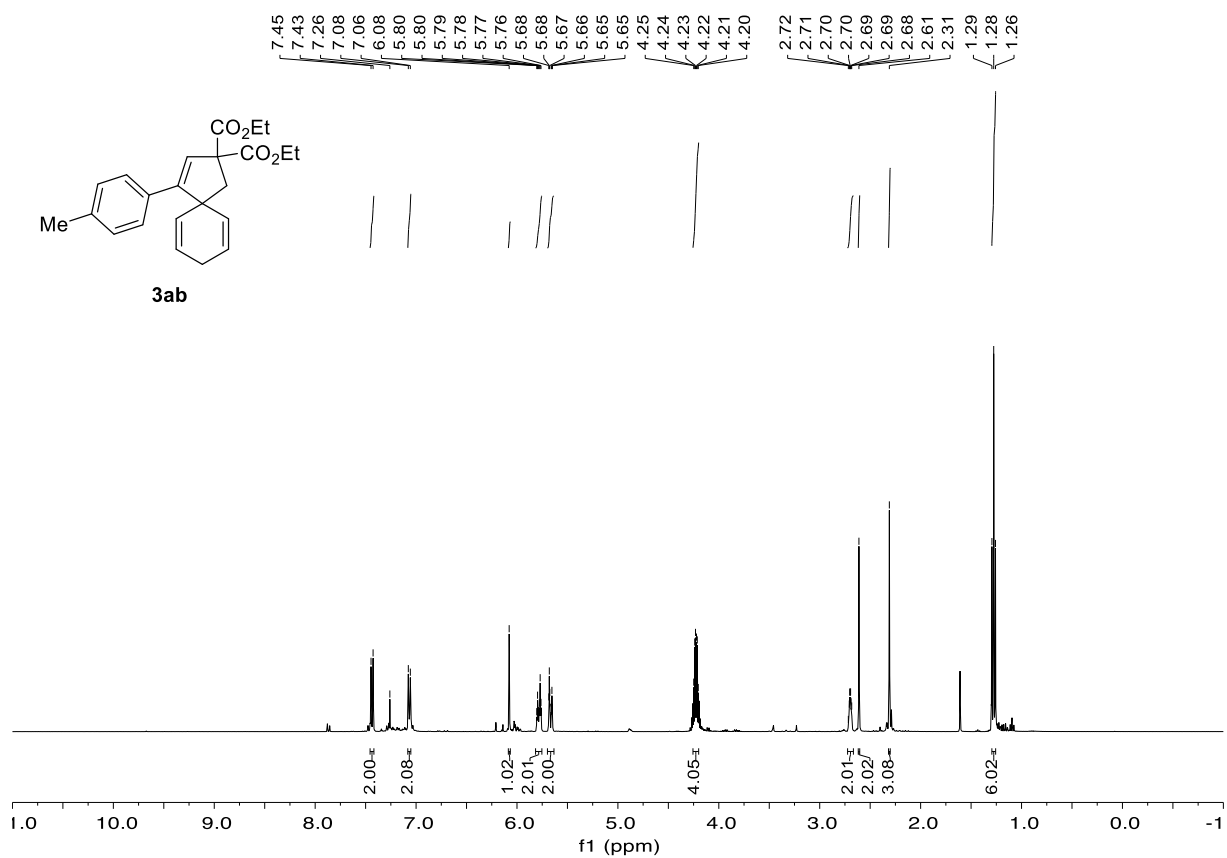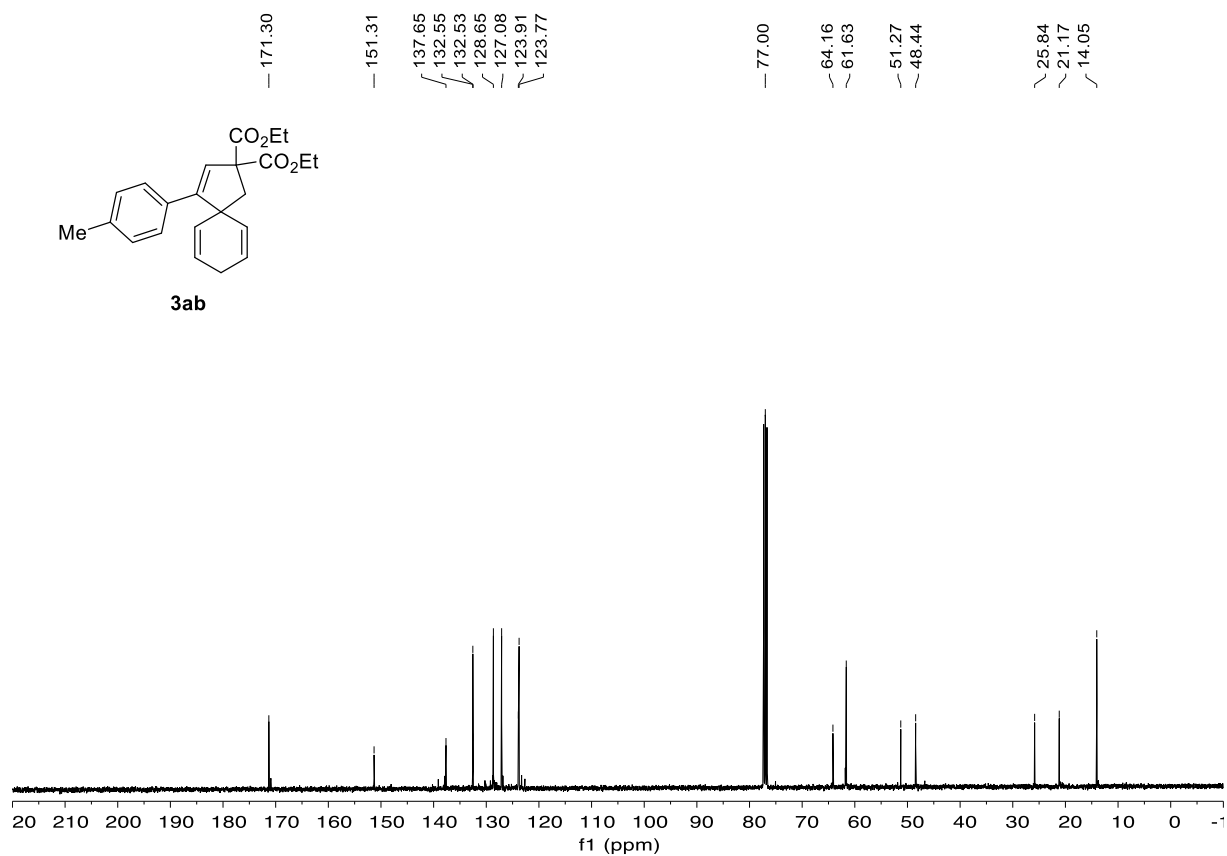

**<sup>1</sup>H NMR (300 MHz, CDCl<sub>3</sub>) and <sup>13</sup>C NMR (75 MHz, CDCl<sub>3</sub>) spectra of product 3ac**

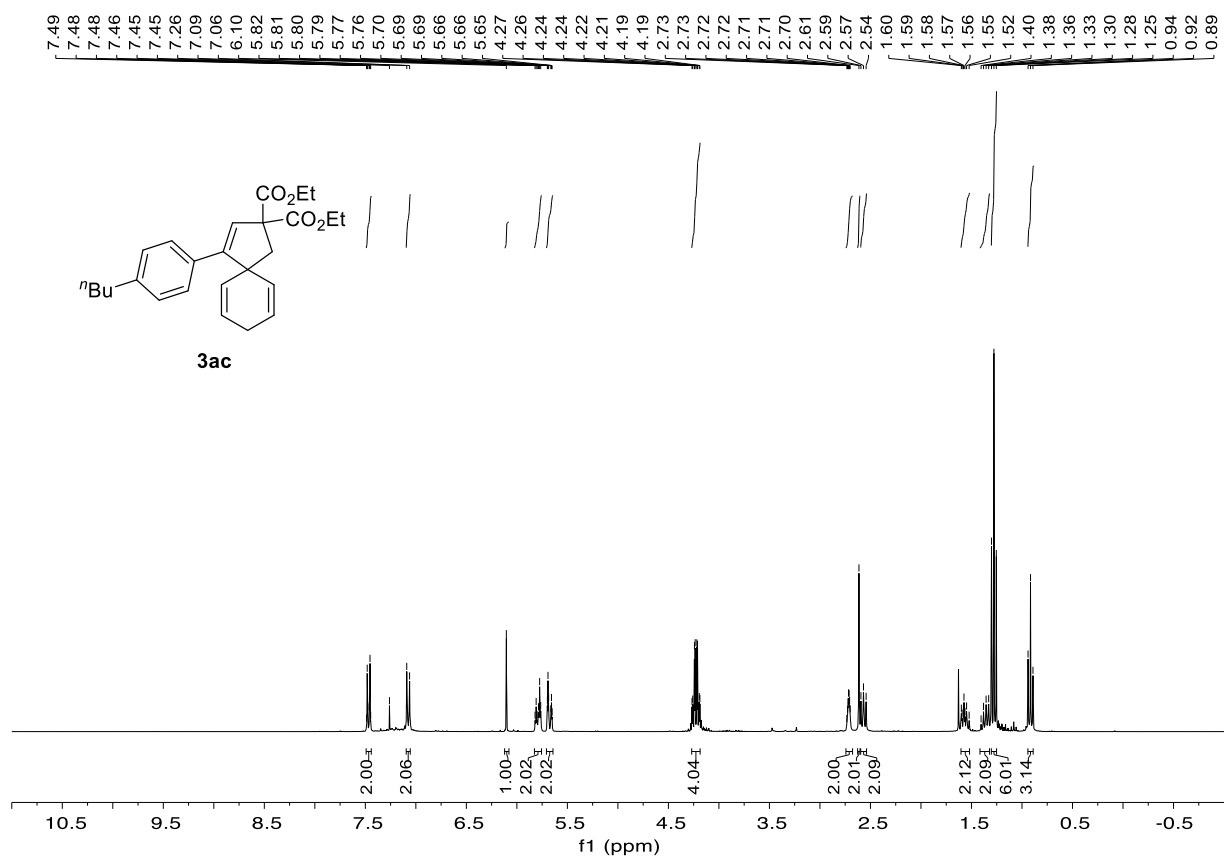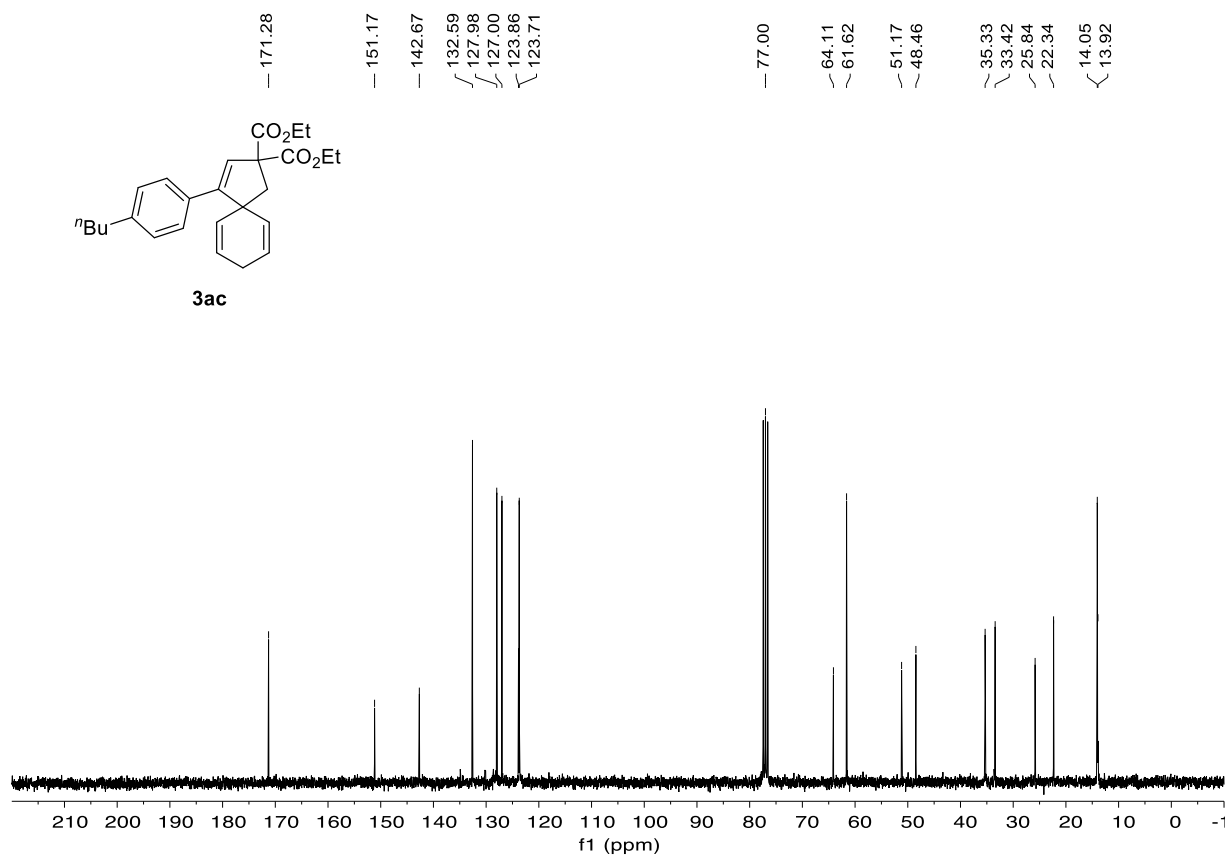

<sup>1</sup>H NMR (300 MHz, CDCl<sub>3</sub>) and <sup>13</sup>C NMR (100 MHz, CDCl<sub>3</sub>) spectra of product 3ad

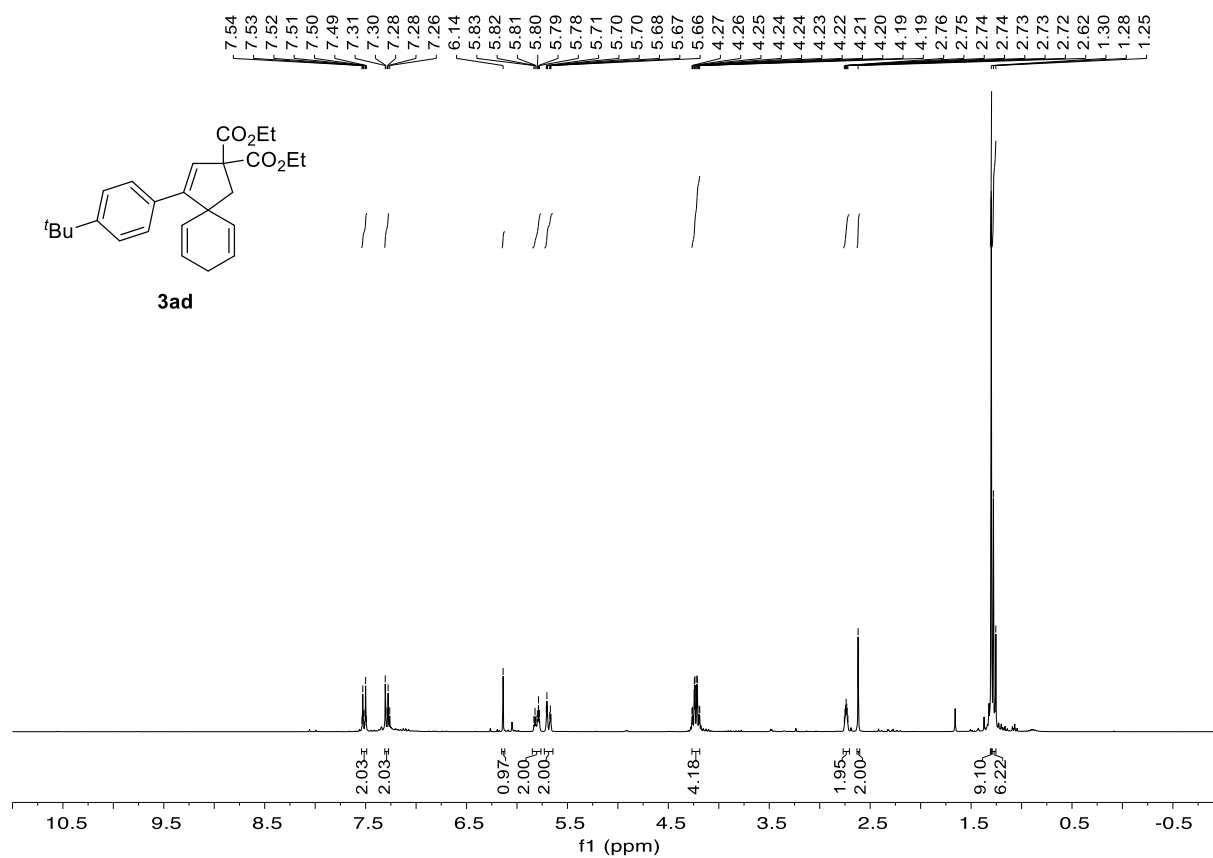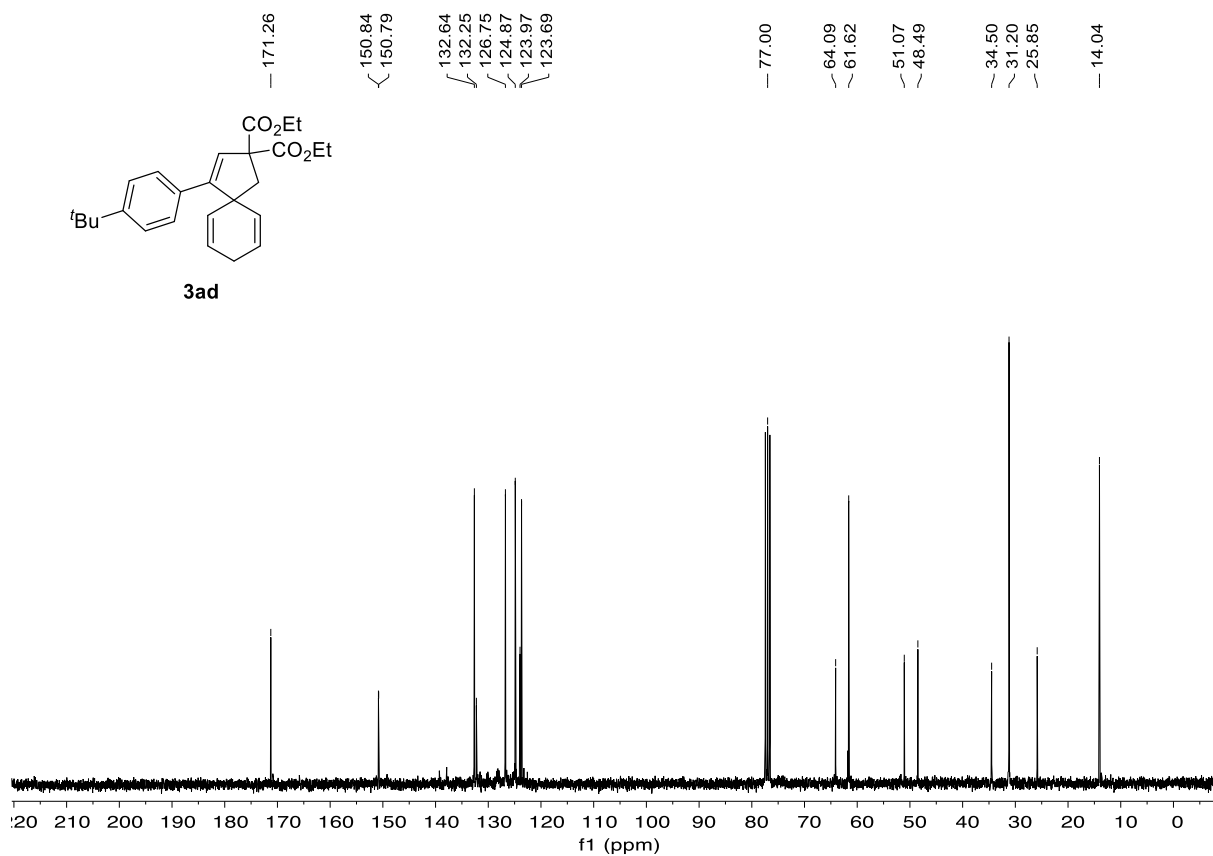



**<sup>1</sup>H NMR (300 MHz, CDCl<sub>3</sub>) and <sup>13</sup>C NMR (75 MHz, CDCl<sub>3</sub>) spectra of product 3ae**

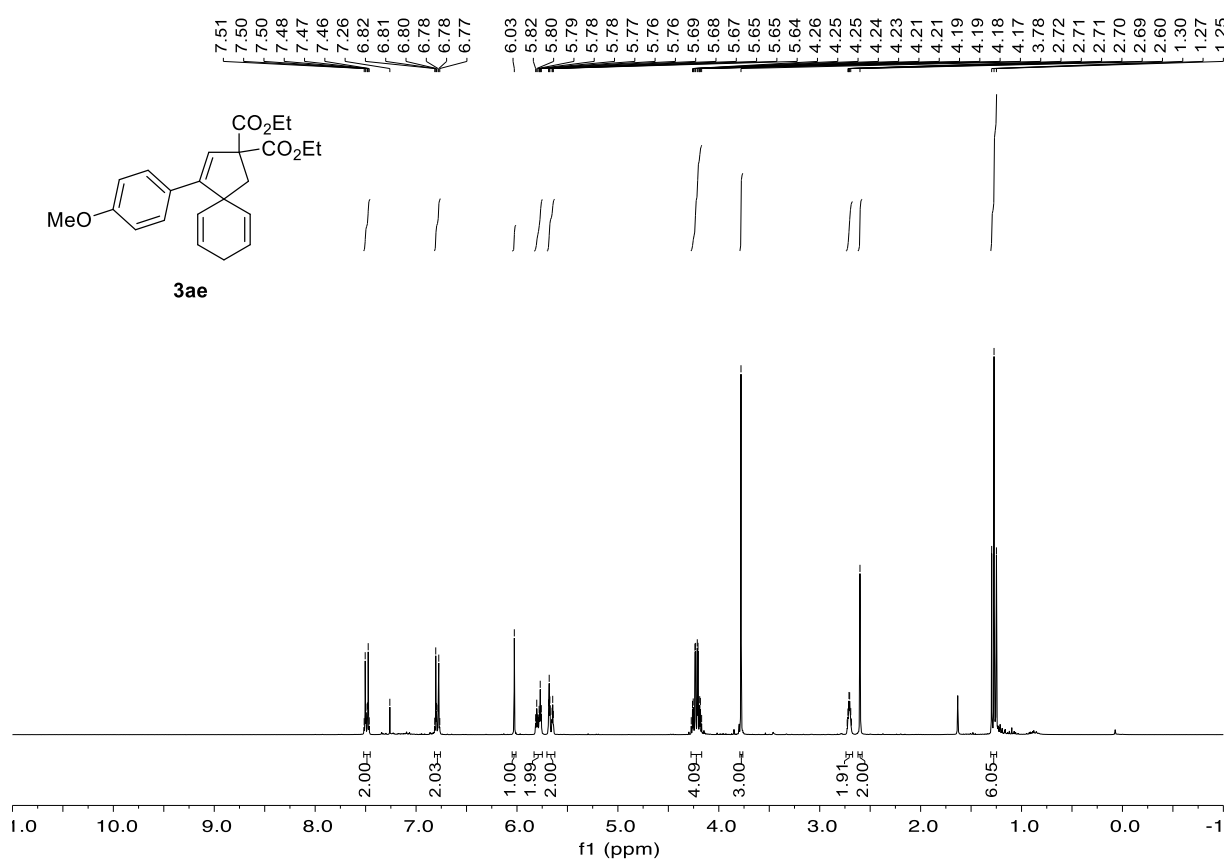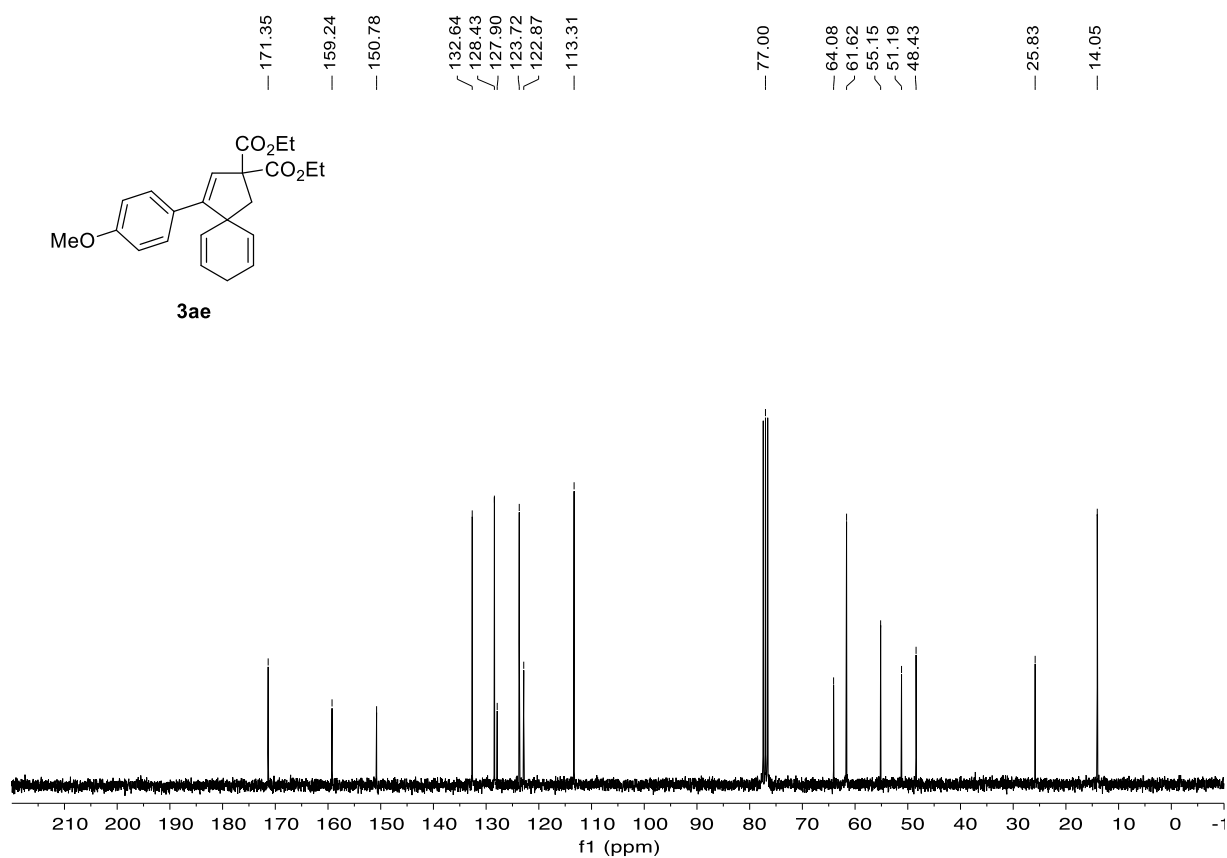

**<sup>1</sup>H NMR (400 MHz, CDCl<sub>3</sub>) and <sup>13</sup>C NMR (100 MHz, CDCl<sub>3</sub>) spectra of product 3af**

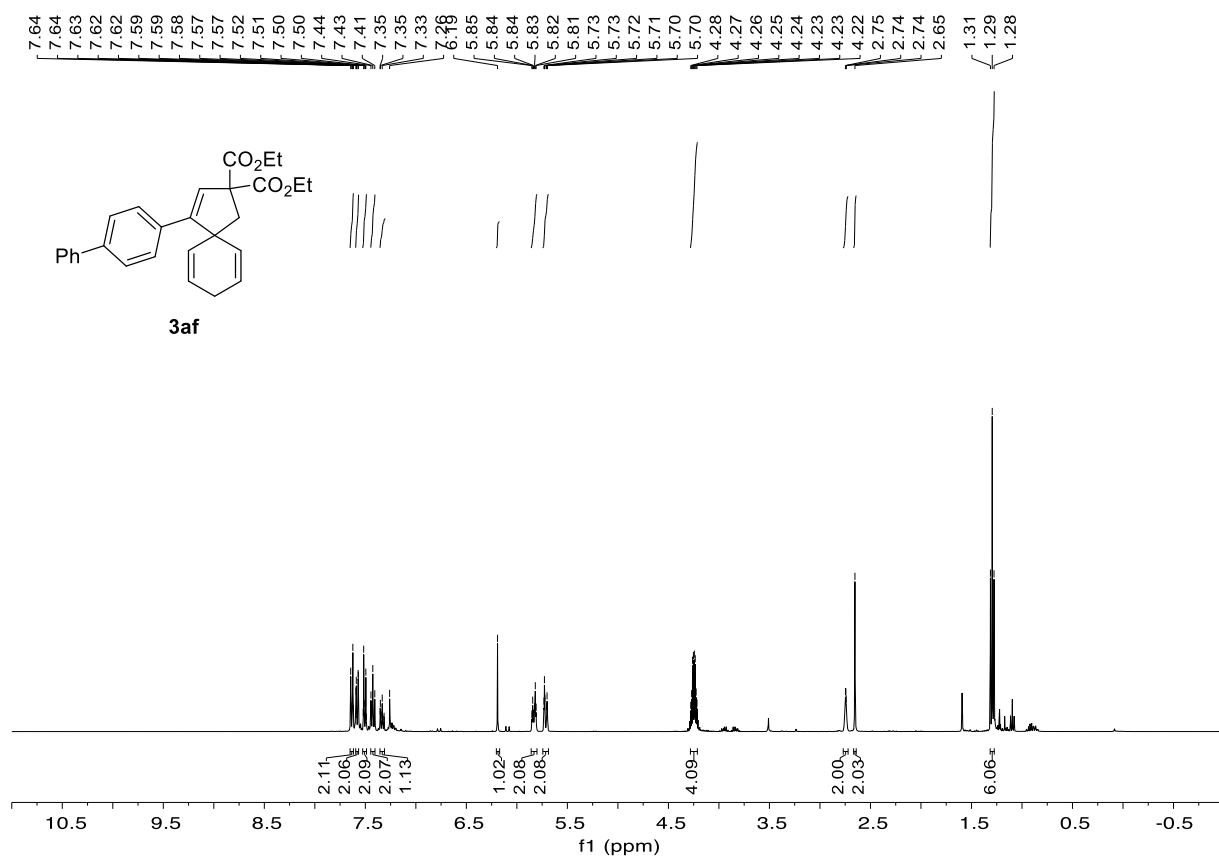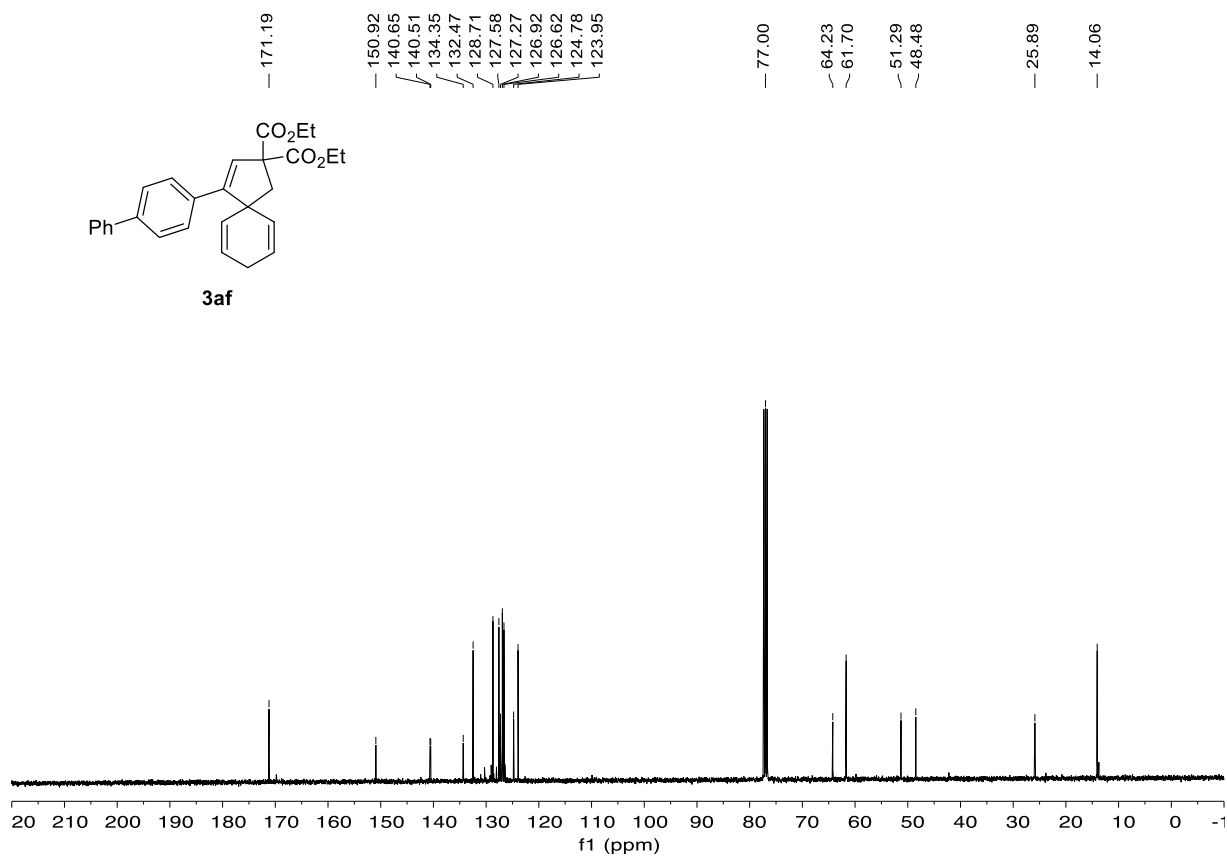

<sup>1</sup>H NMR (300 MHz, CDCl<sub>3</sub>), <sup>13</sup>C NMR (75 MHz, CDCl<sub>3</sub>) and <sup>19</sup>F NMR (376 MHz, CDCl<sub>3</sub>) spectra of product 3ag

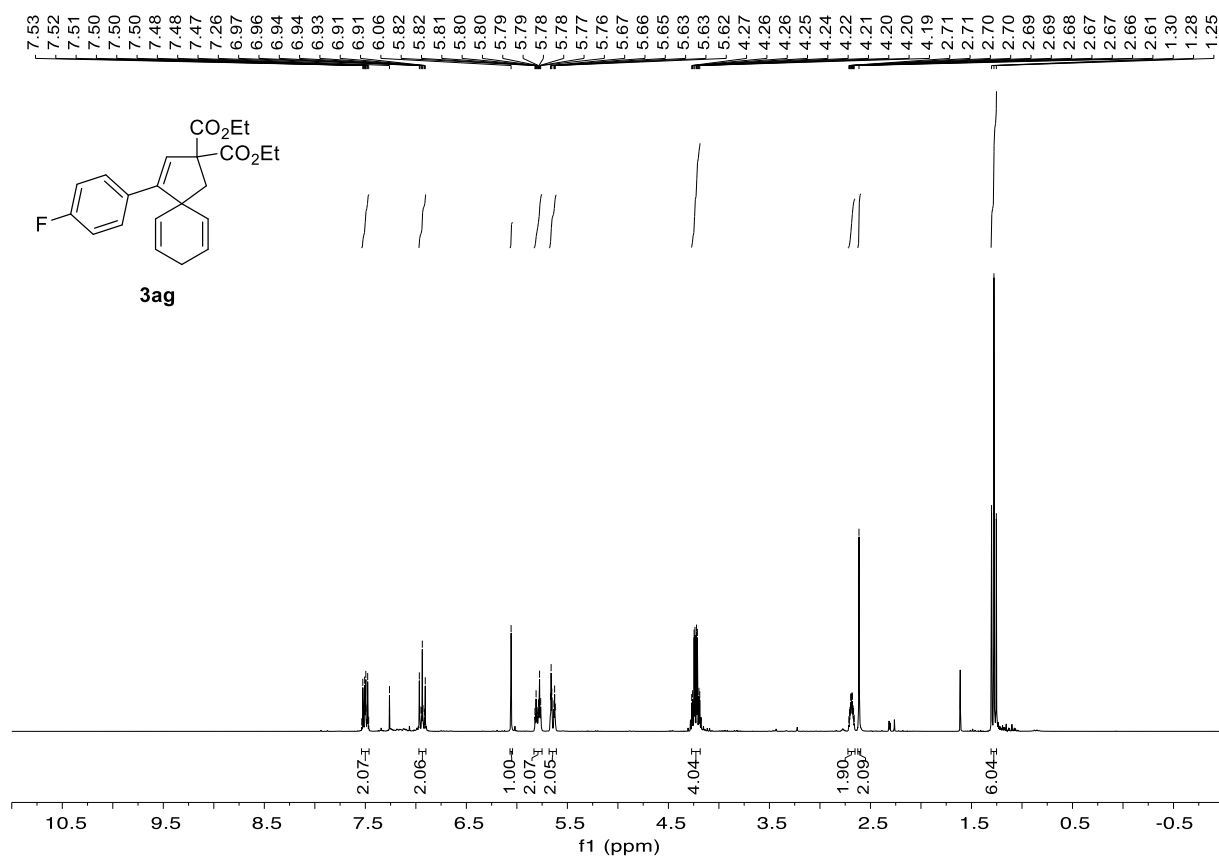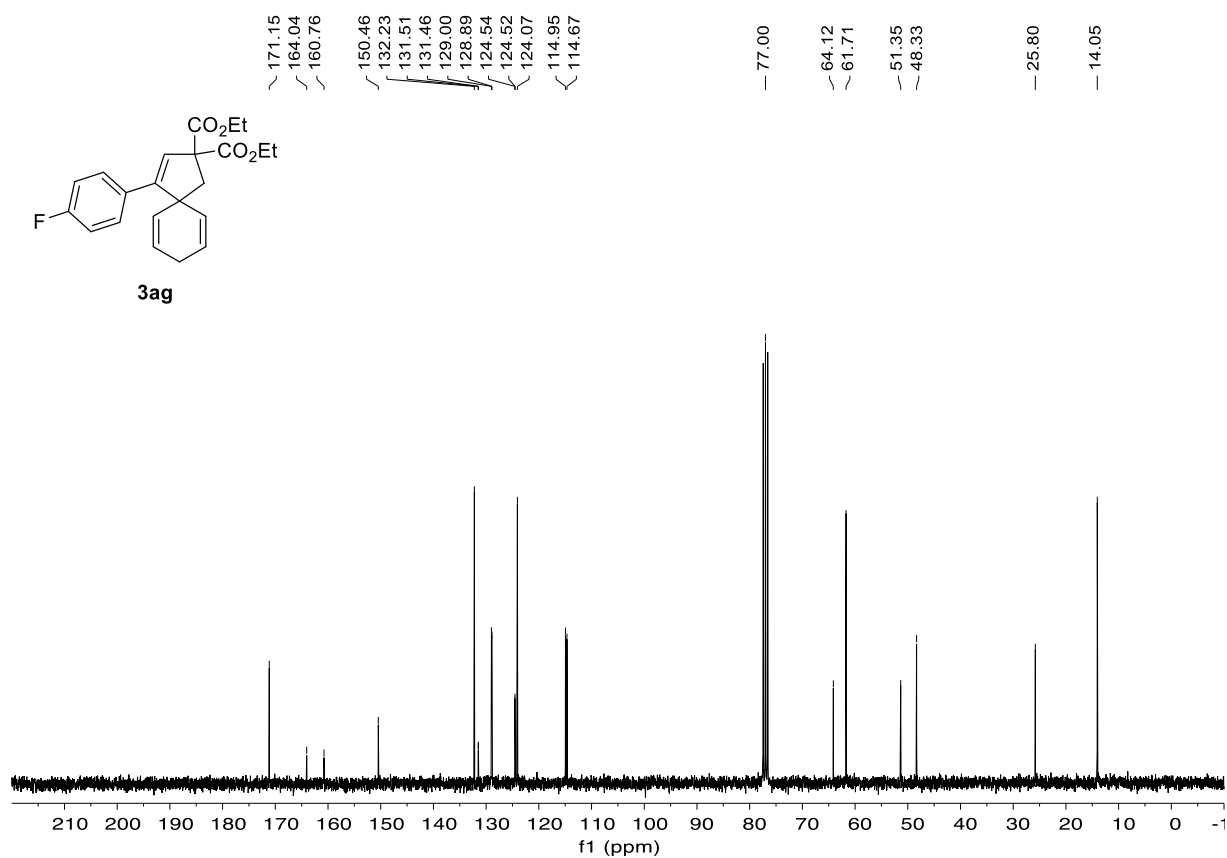

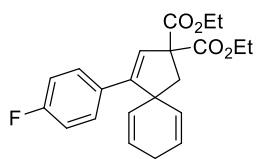

**3ag**

— -114.50

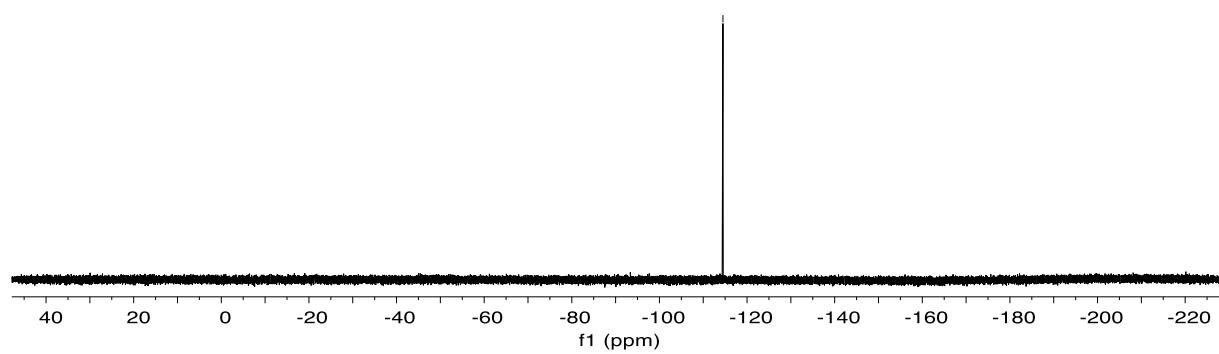

**<sup>1</sup>H NMR (300 MHz, CDCl<sub>3</sub>) and <sup>13</sup>C NMR (75 MHz, CDCl<sub>3</sub>) spectra of product 3ah**

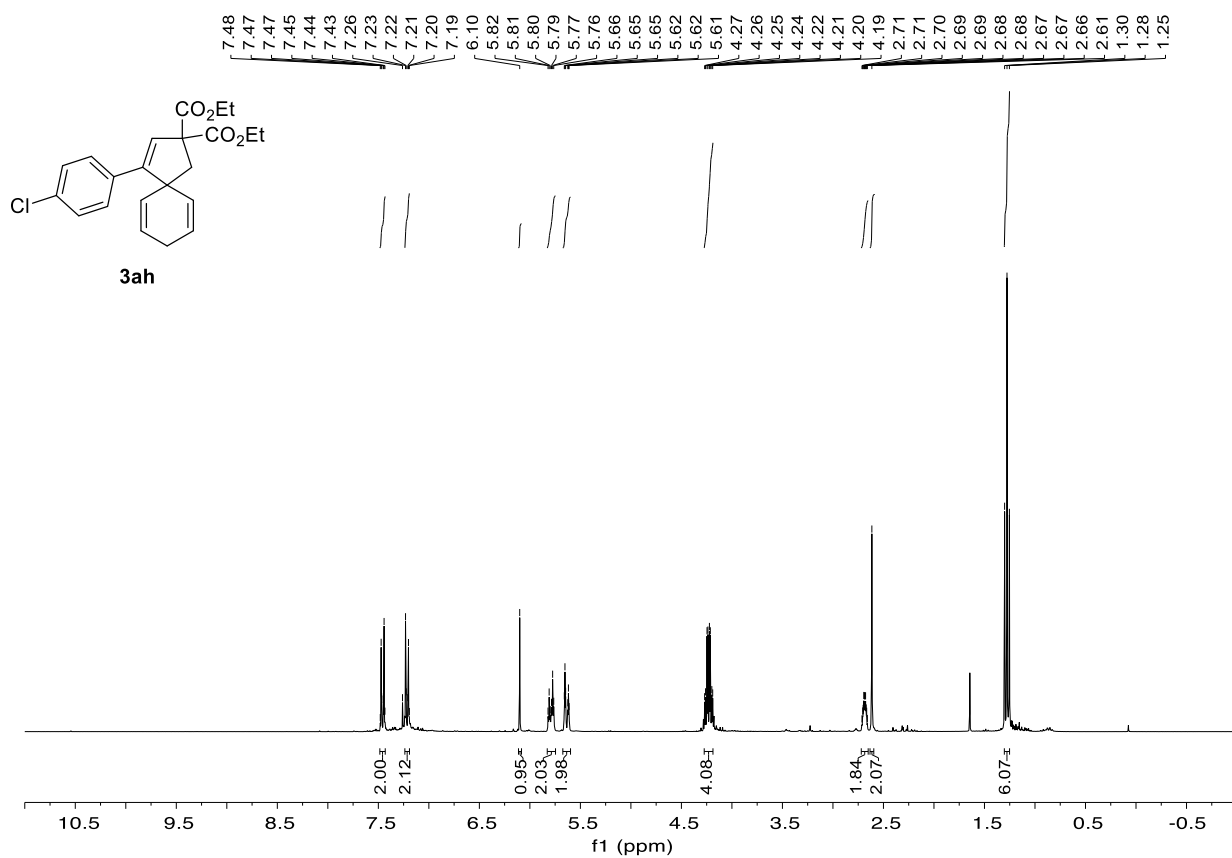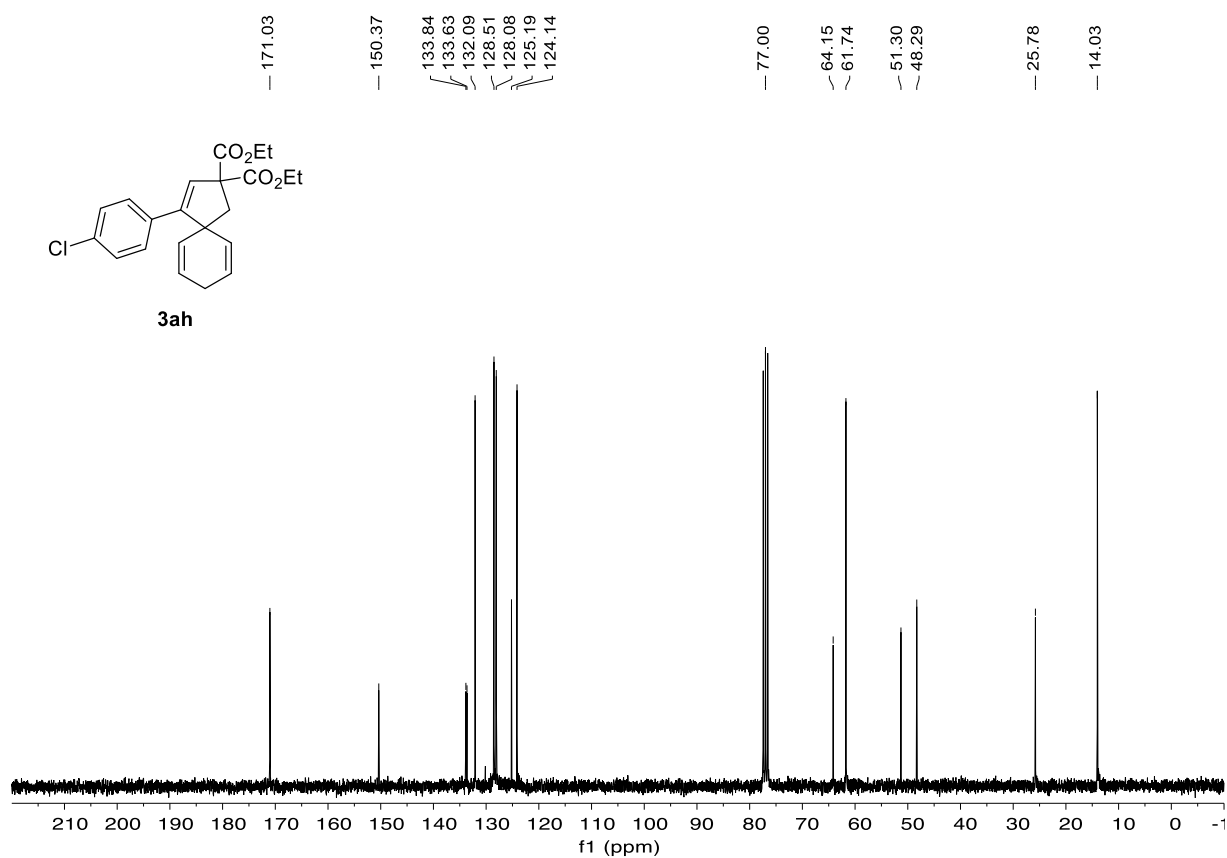

<sup>1</sup>H NMR (300 MHz, CDCl<sub>3</sub>) and <sup>13</sup>C NMR (100 MHz, CDCl<sub>3</sub>) spectra of product 3ai

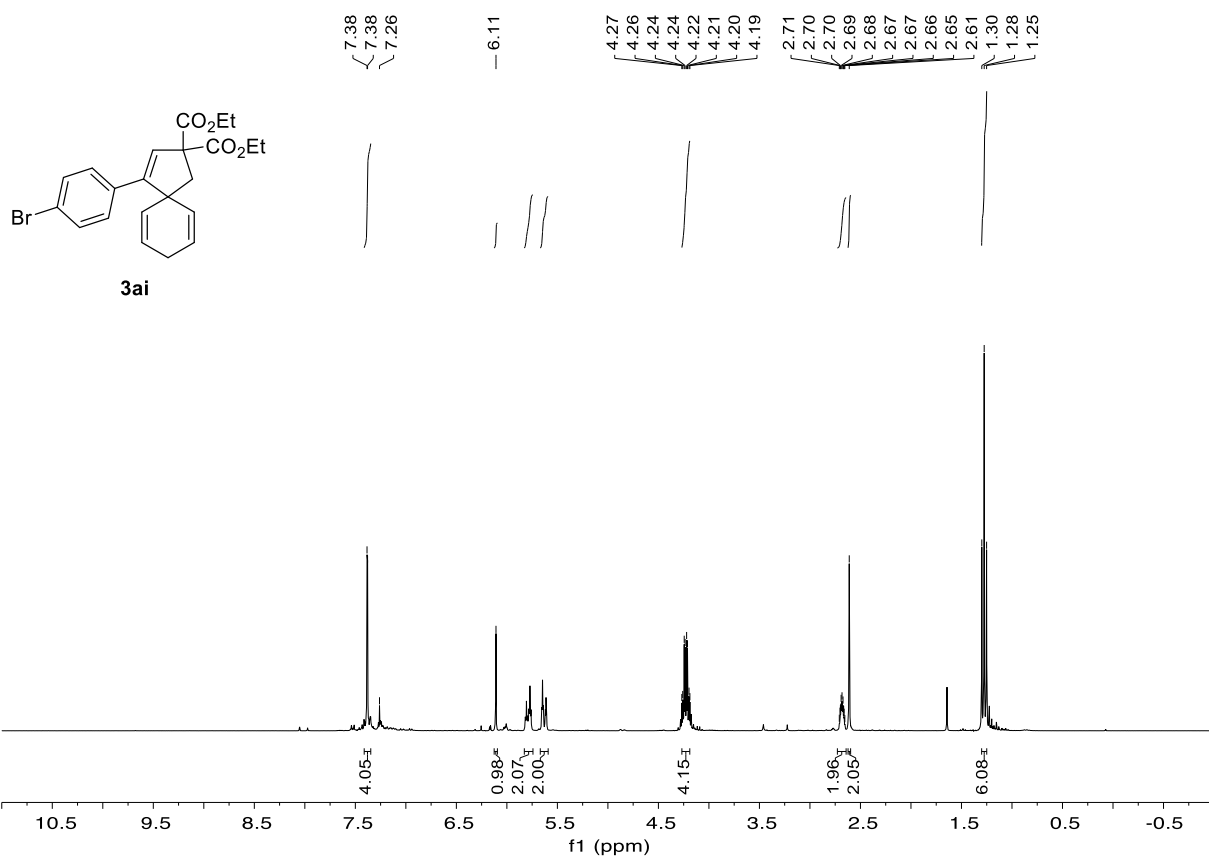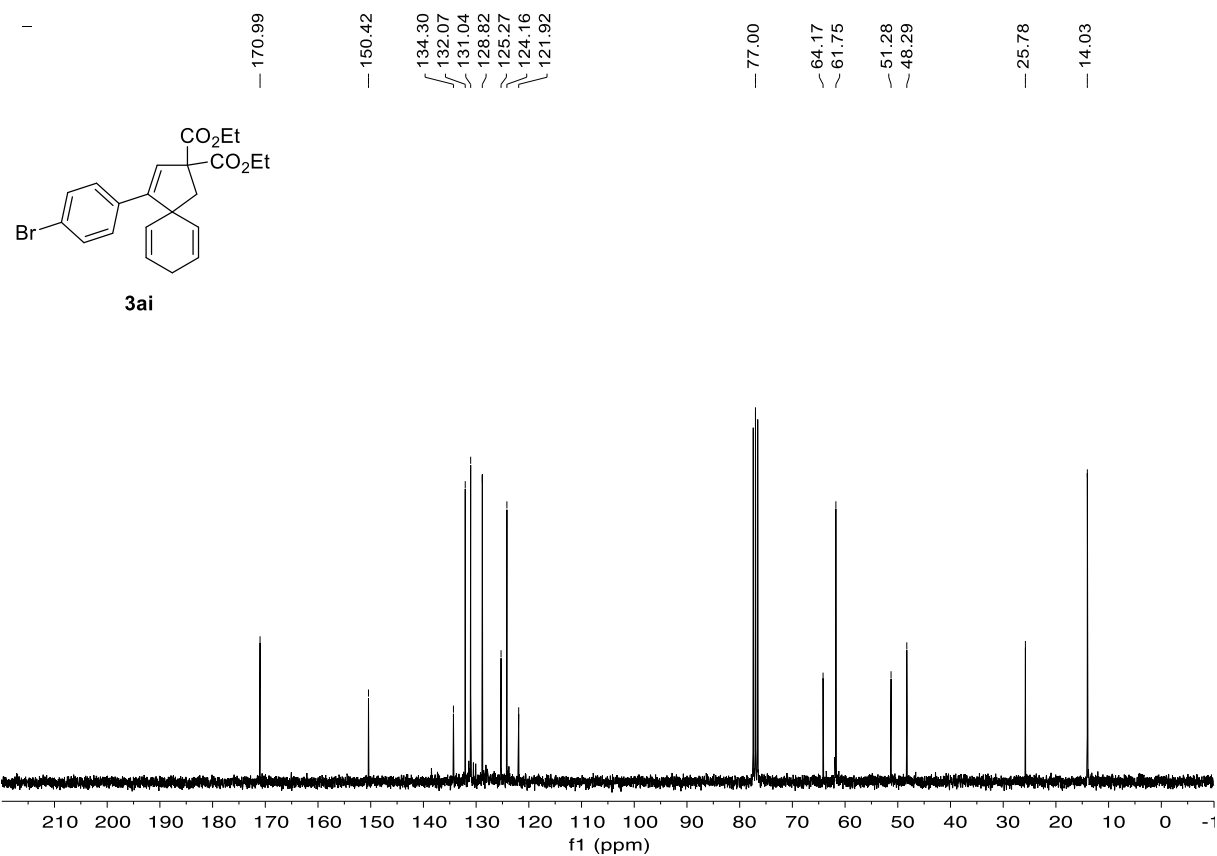

<sup>1</sup>H NMR (300 MHz, CDCl<sub>3</sub>), <sup>13</sup>C NMR (75 MHz, CDCl<sub>3</sub>) and <sup>19</sup>F NMR (376 MHz, CDCl<sub>3</sub>) spectra of product 3aj

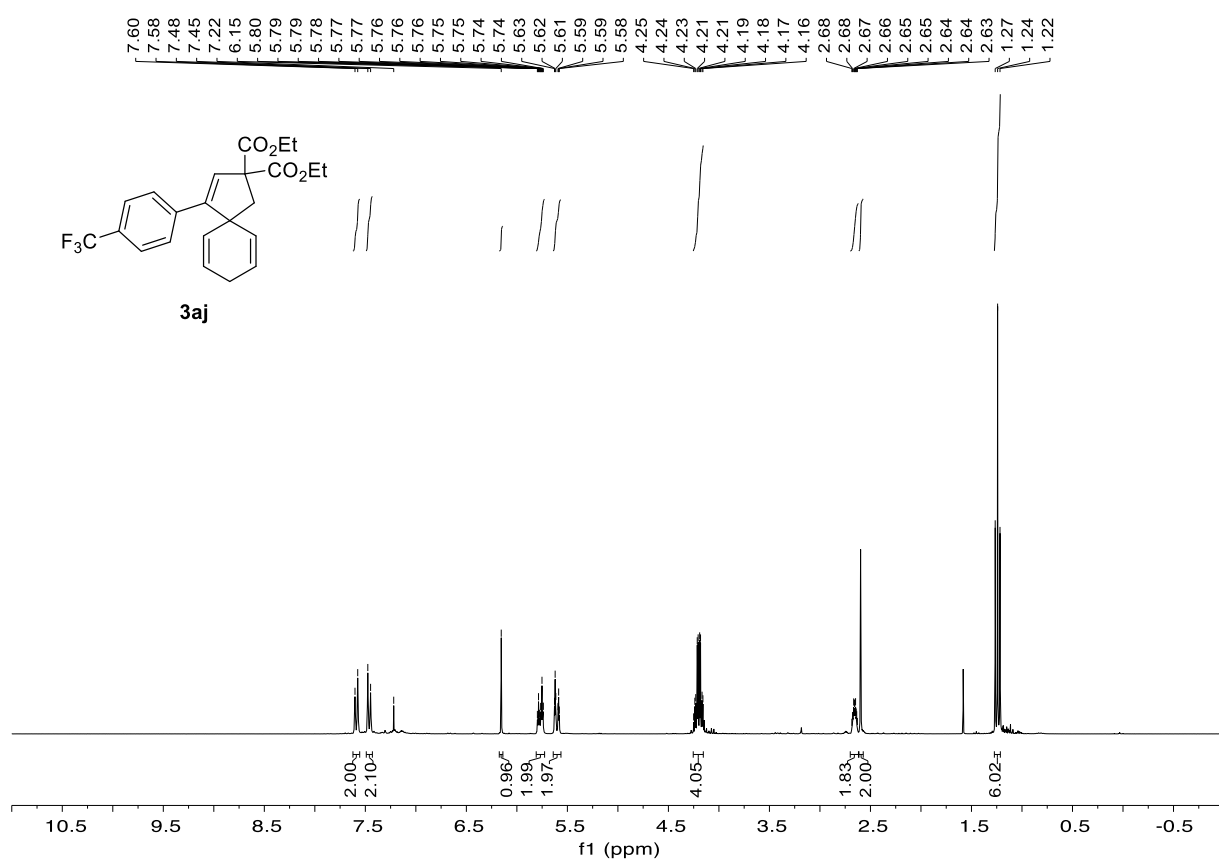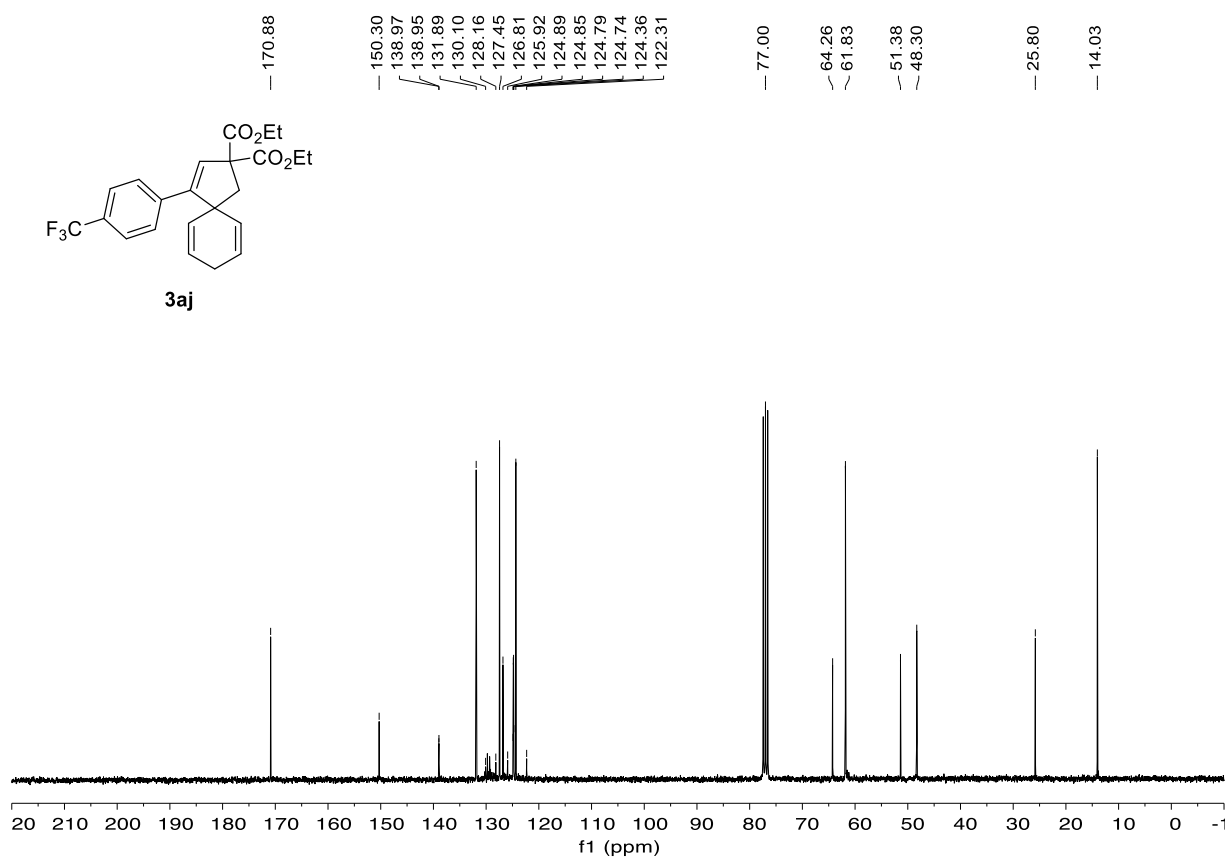

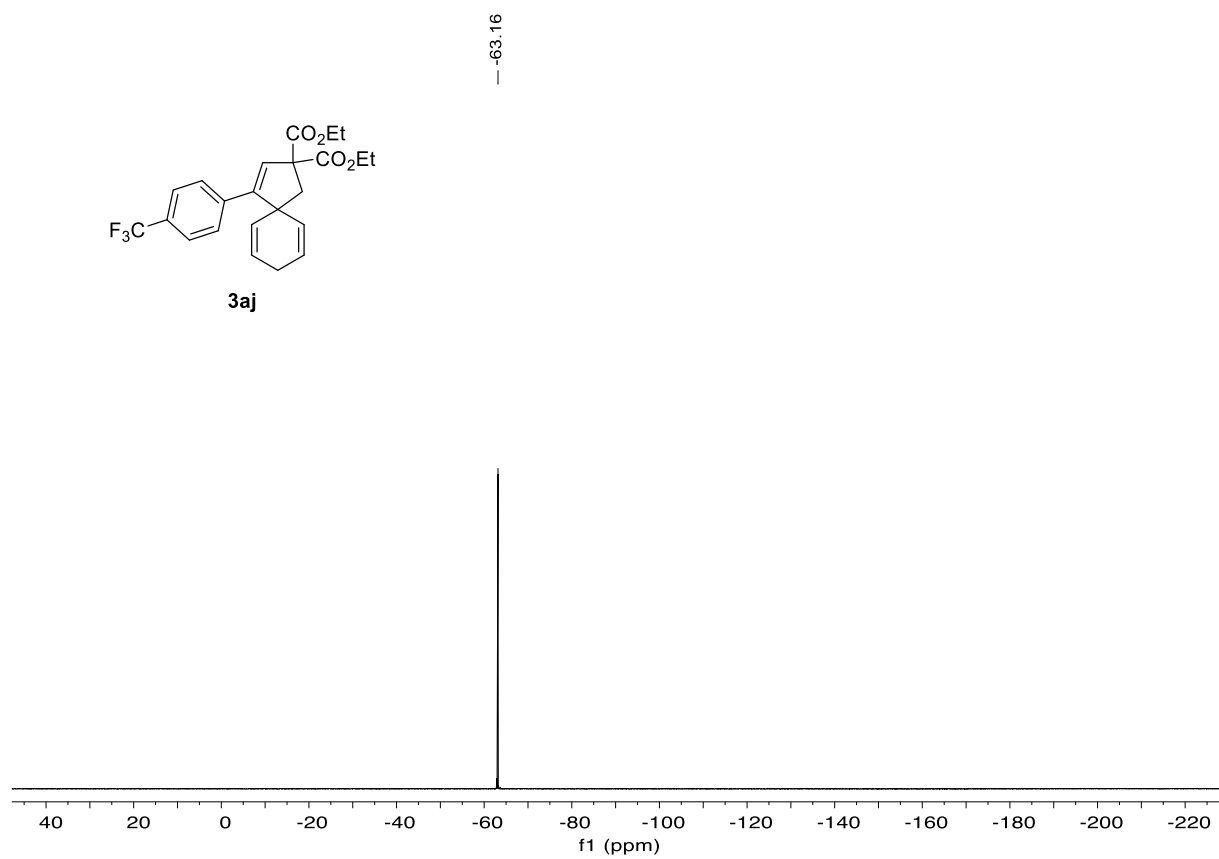



**$^1\text{H}$  NMR (300 MHz,  $\text{CDCl}_3$ ) and  $^{13}\text{C}$  NMR (75 MHz,  $\text{CDCl}_3$ ) spectra of product 3ak**

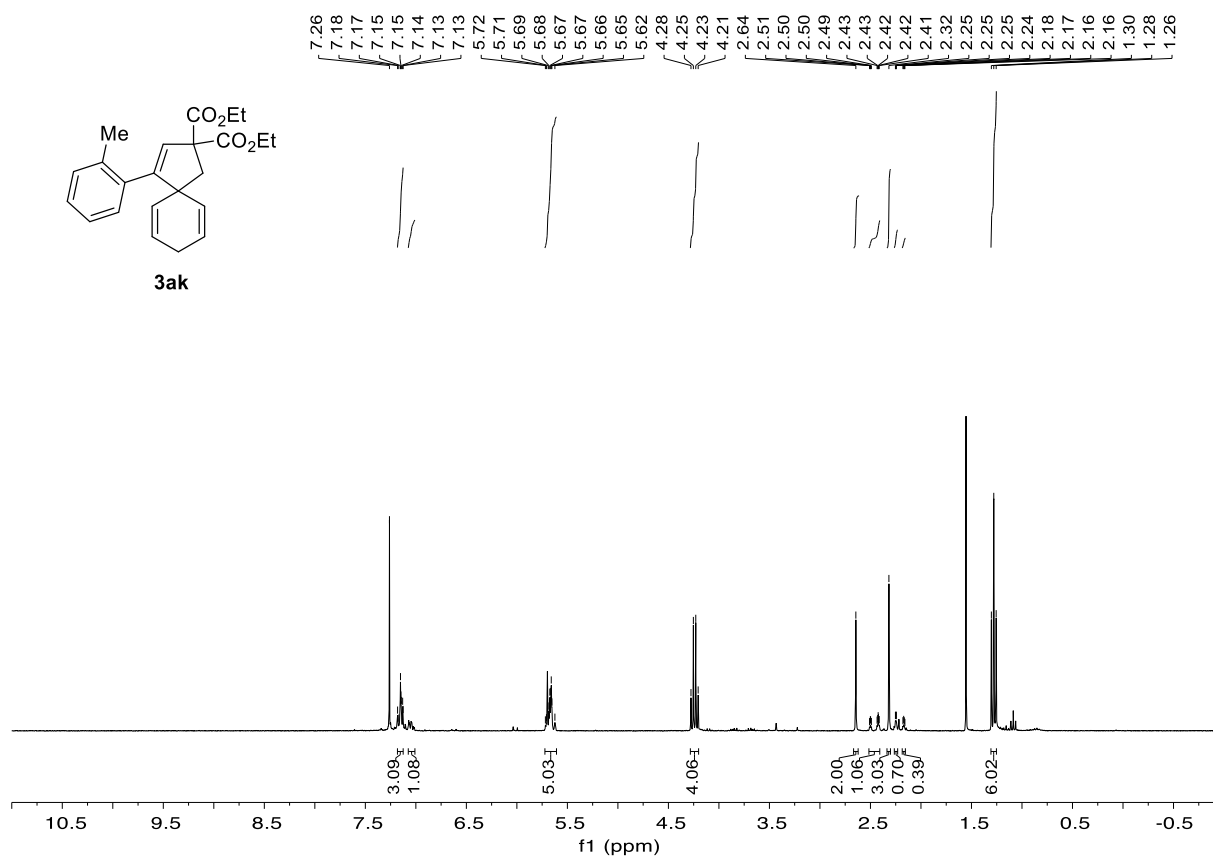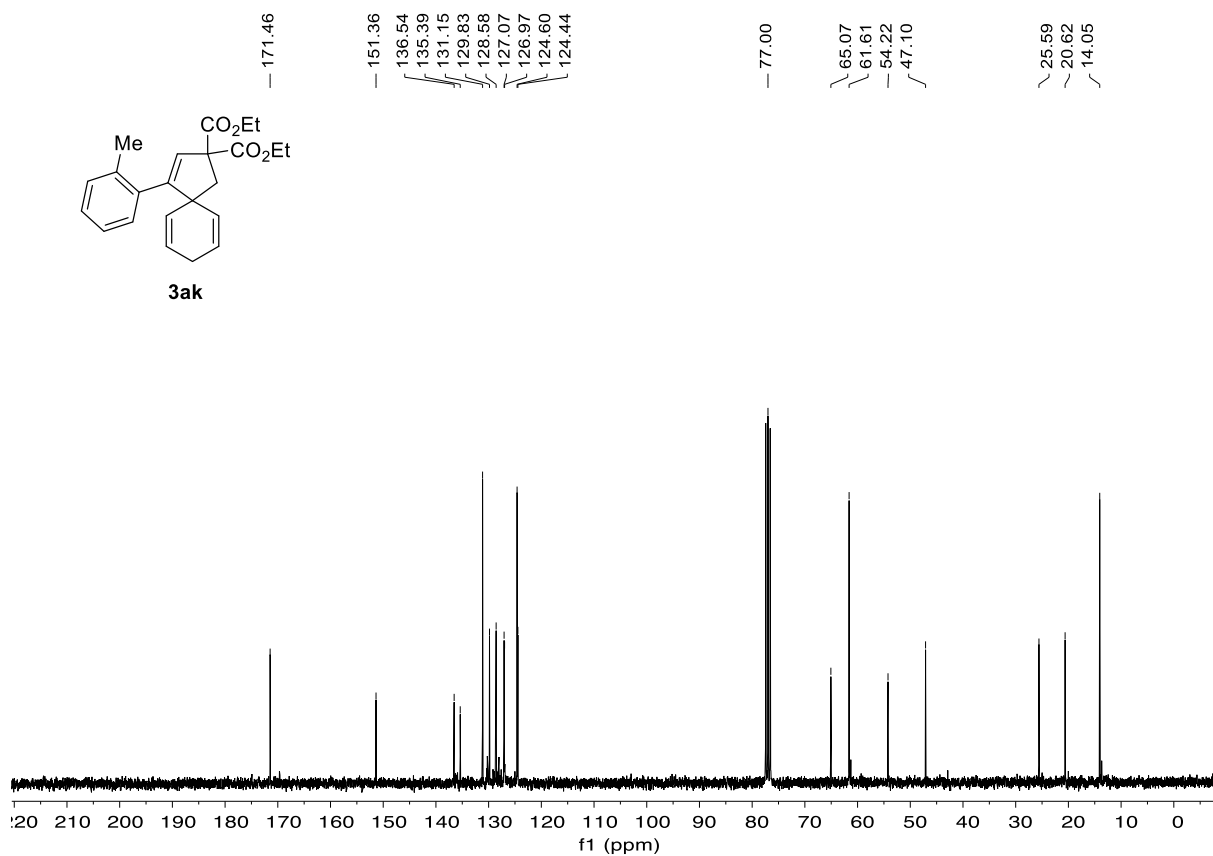

**<sup>1</sup>H NMR (400 MHz, CDCl<sub>3</sub>), <sup>13</sup>C NMR (100 MHz, CDCl<sub>3</sub>) and <sup>19</sup>F NMR (375 MHz, CDCl<sub>3</sub>) spectra of product 3al**

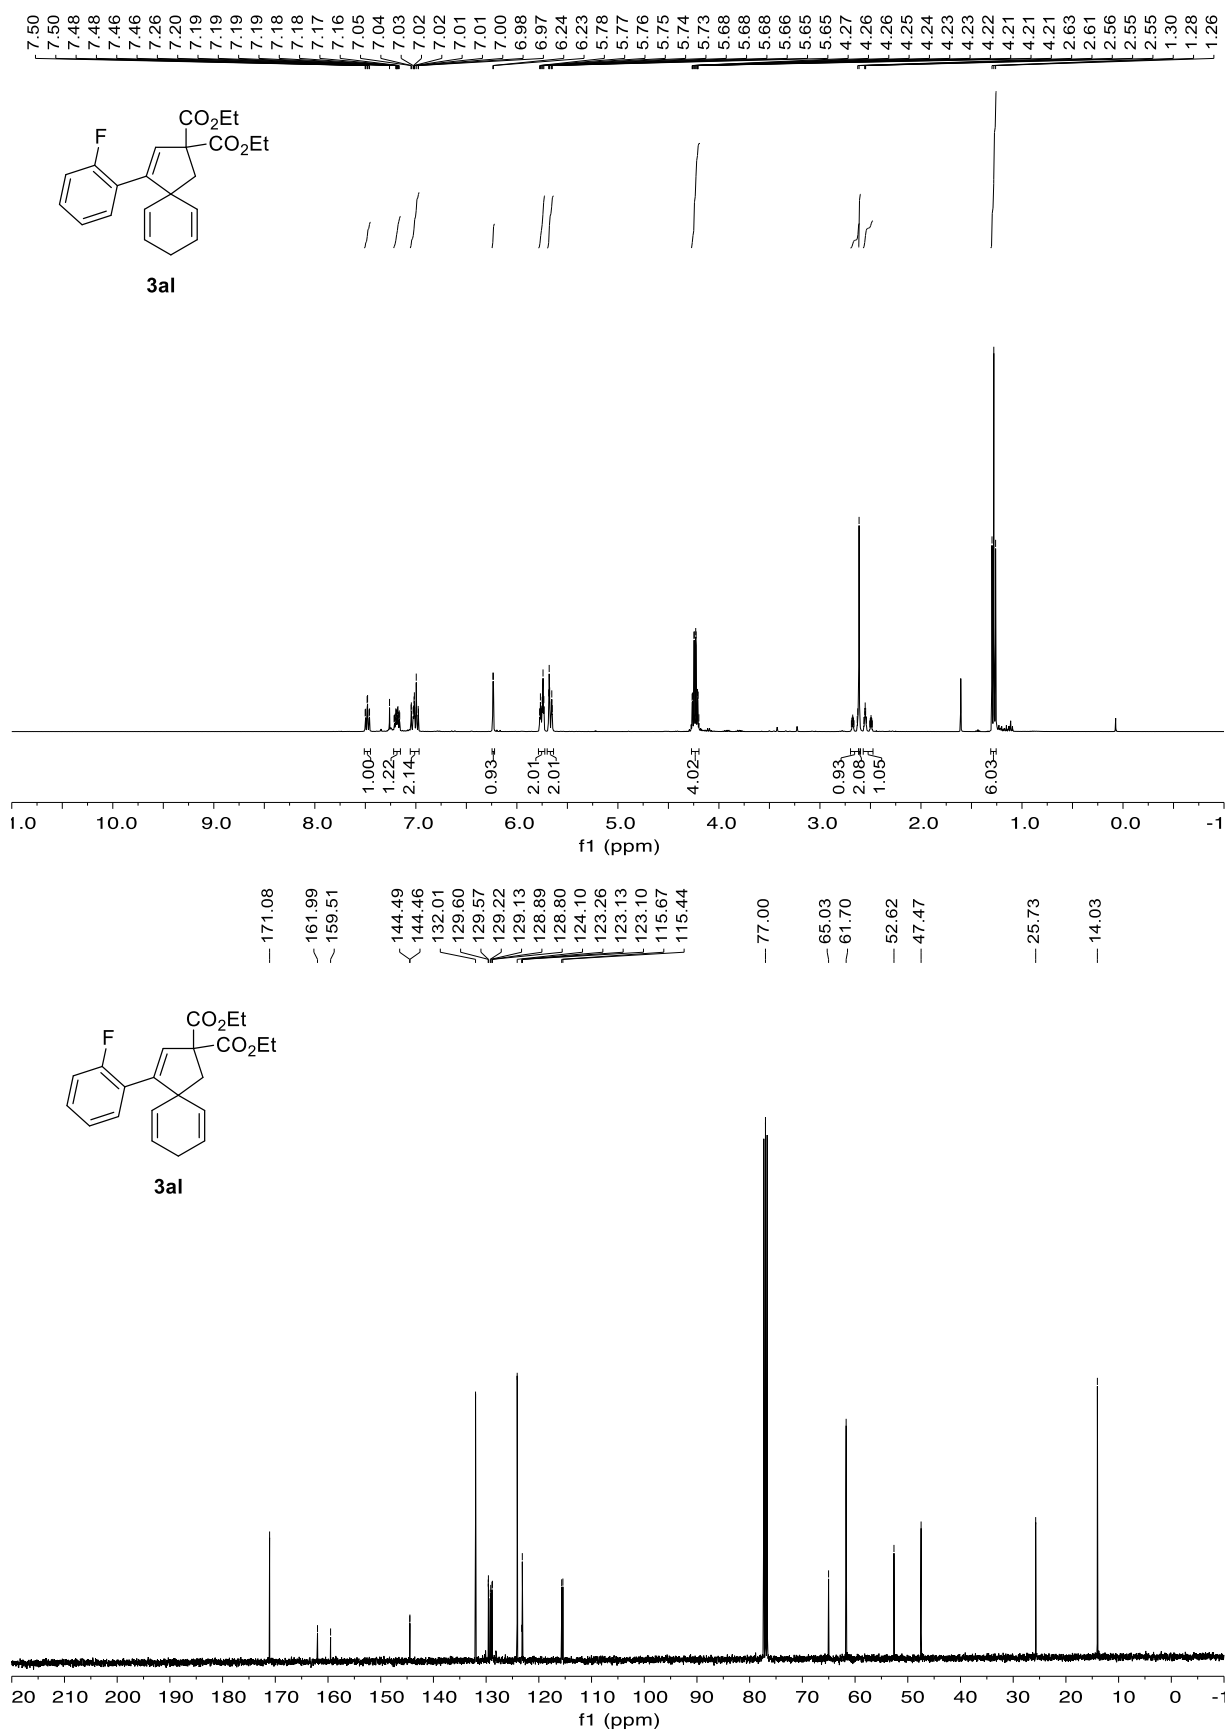

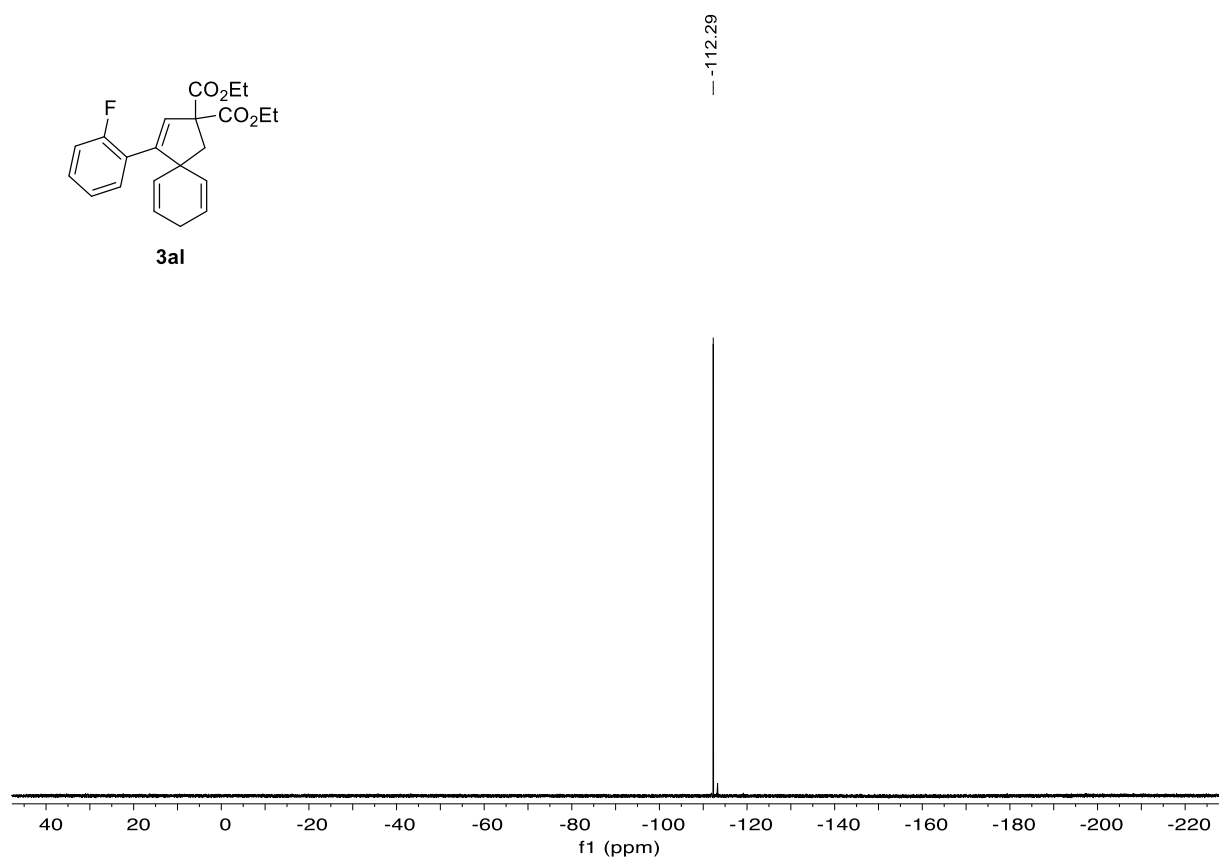

**$^1\text{H}$  NMR (400 MHz,  $\text{CDCl}_3$ ) and  $^{13}\text{C}$  NMR (100 MHz,  $\text{CDCl}_3$ ) spectra of product 3am**

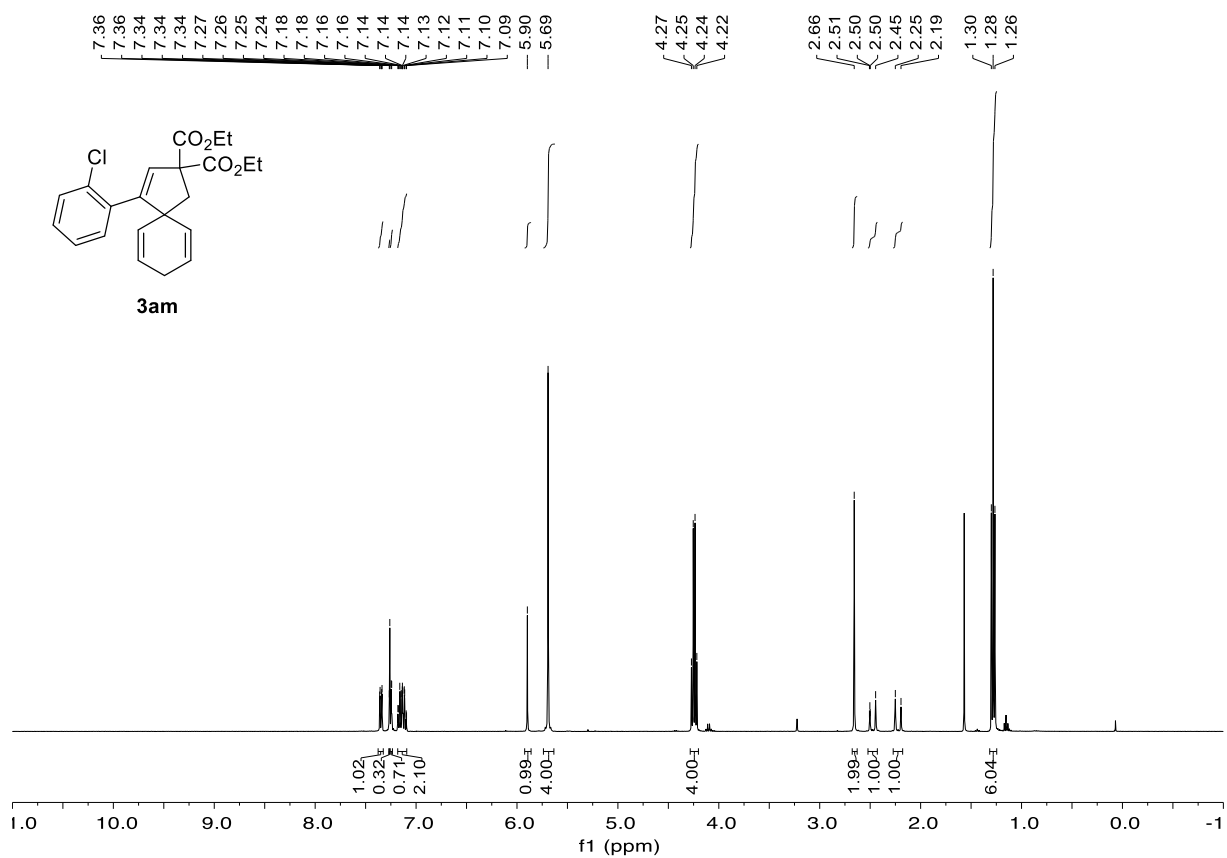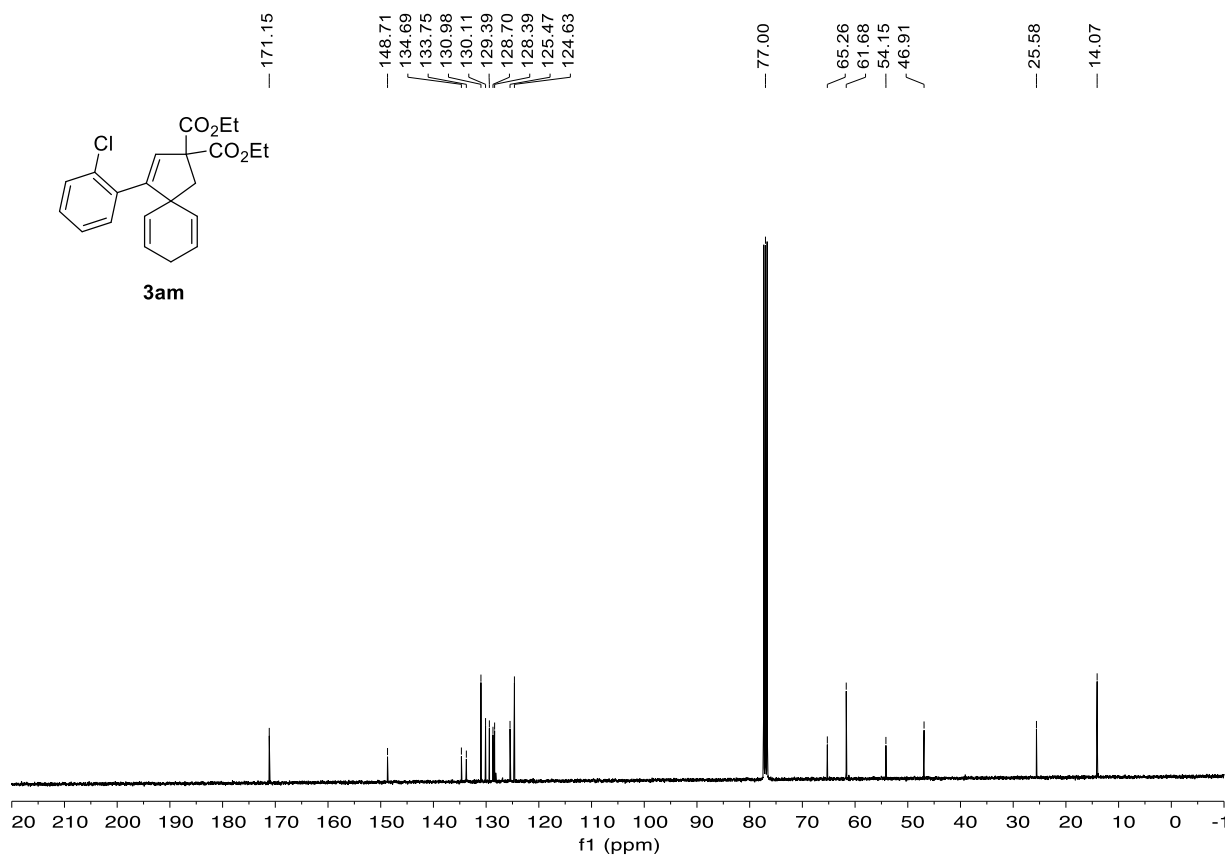

**$^1\text{H}$  NMR (300 MHz,  $\text{CDCl}_3$ ) and  $^{13}\text{C}$  NMR (75 MHz,  $\text{CDCl}_3$ ) spectra of product 3an**

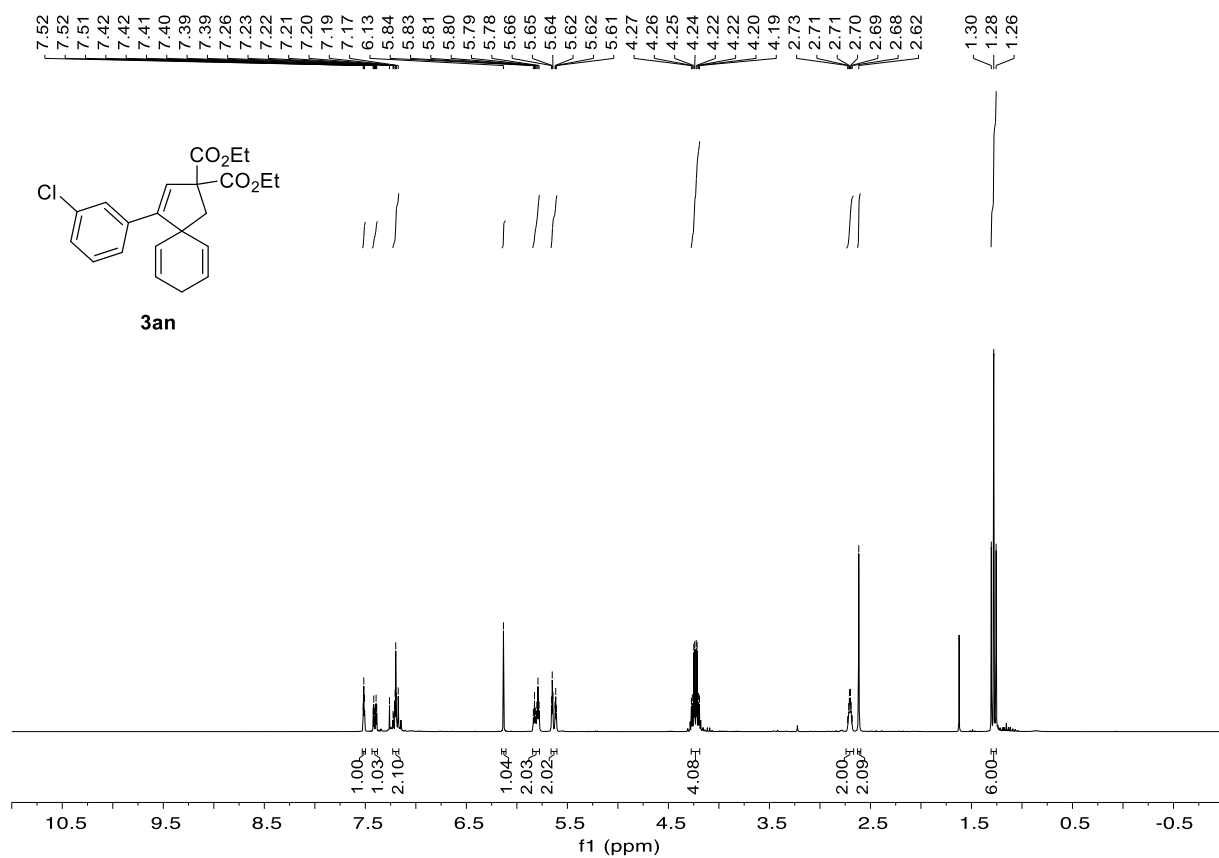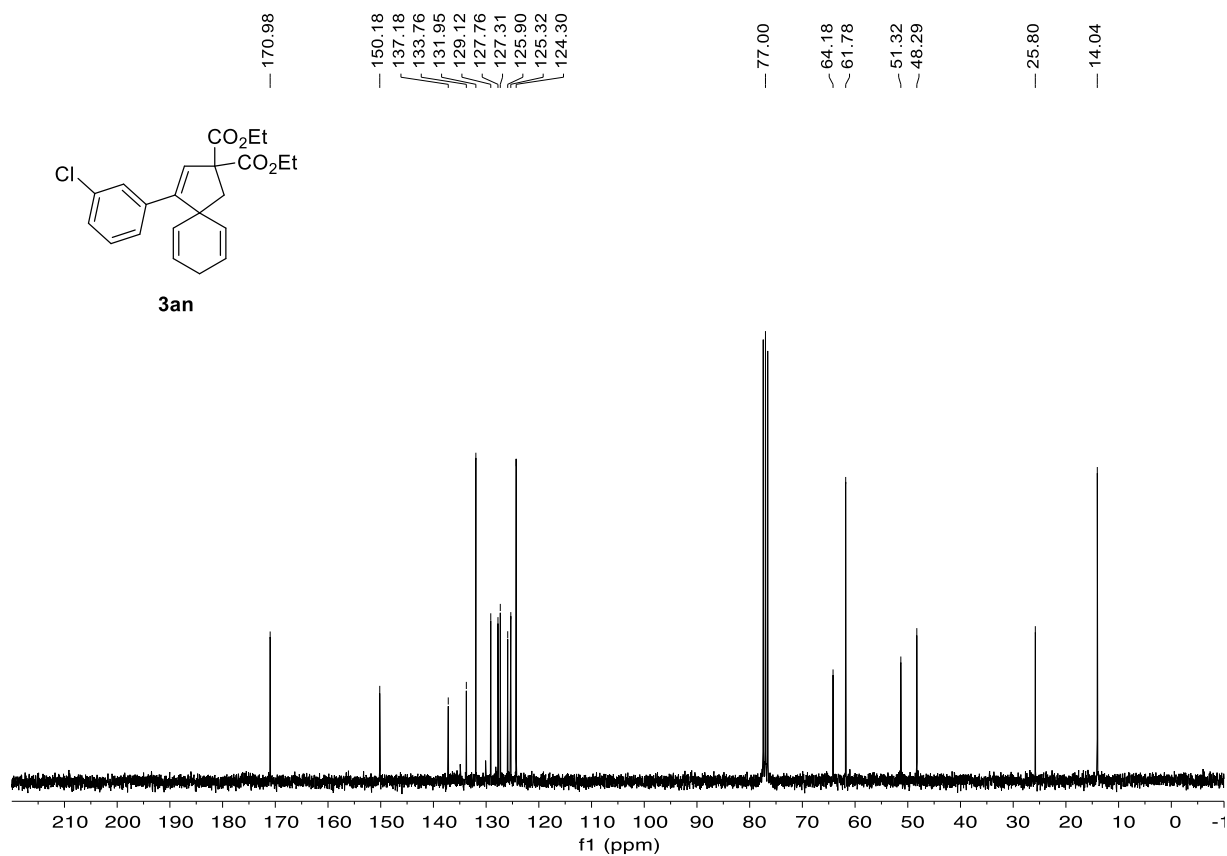

**$^1\text{H}$  NMR (300 MHz,  $\text{CDCl}_3$ ) and  $^{13}\text{C}$  NMR (75 MHz,  $\text{CDCl}_3$ ) spectra of product 3ao**

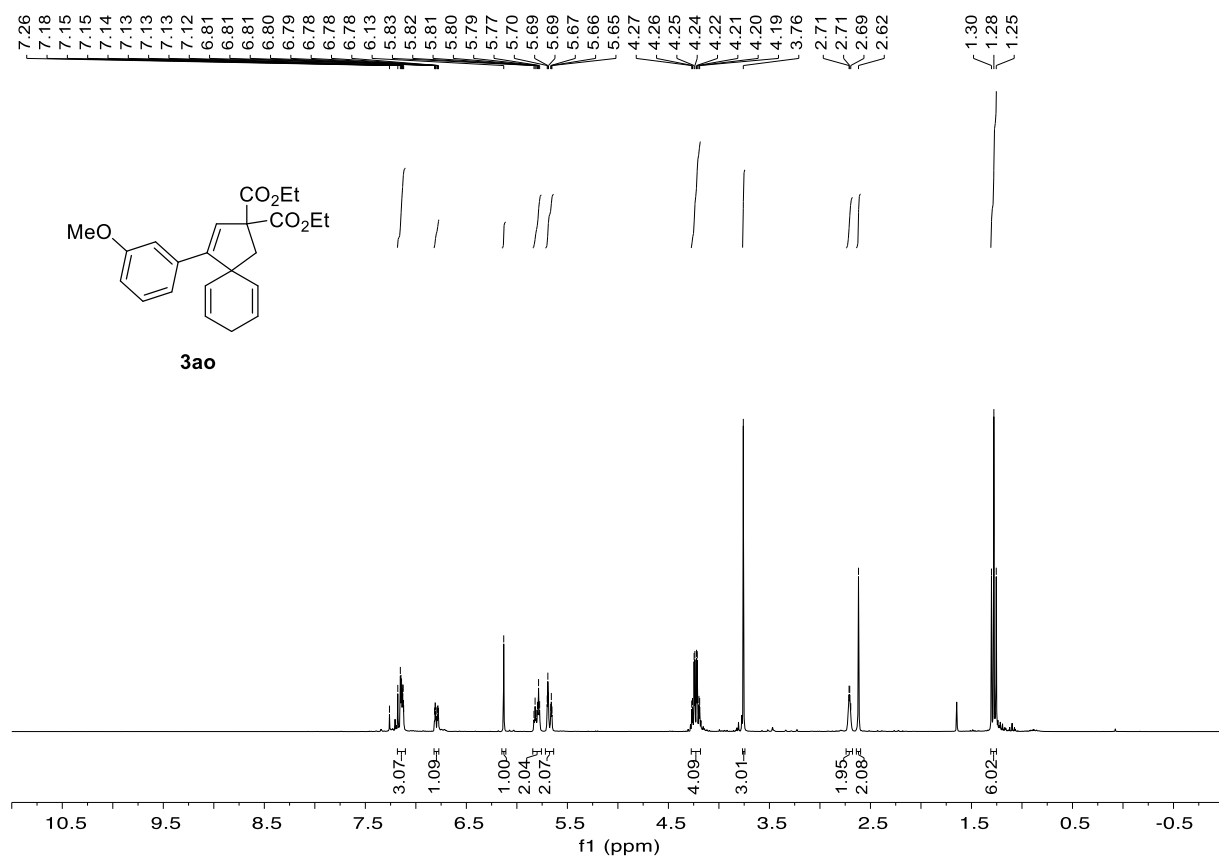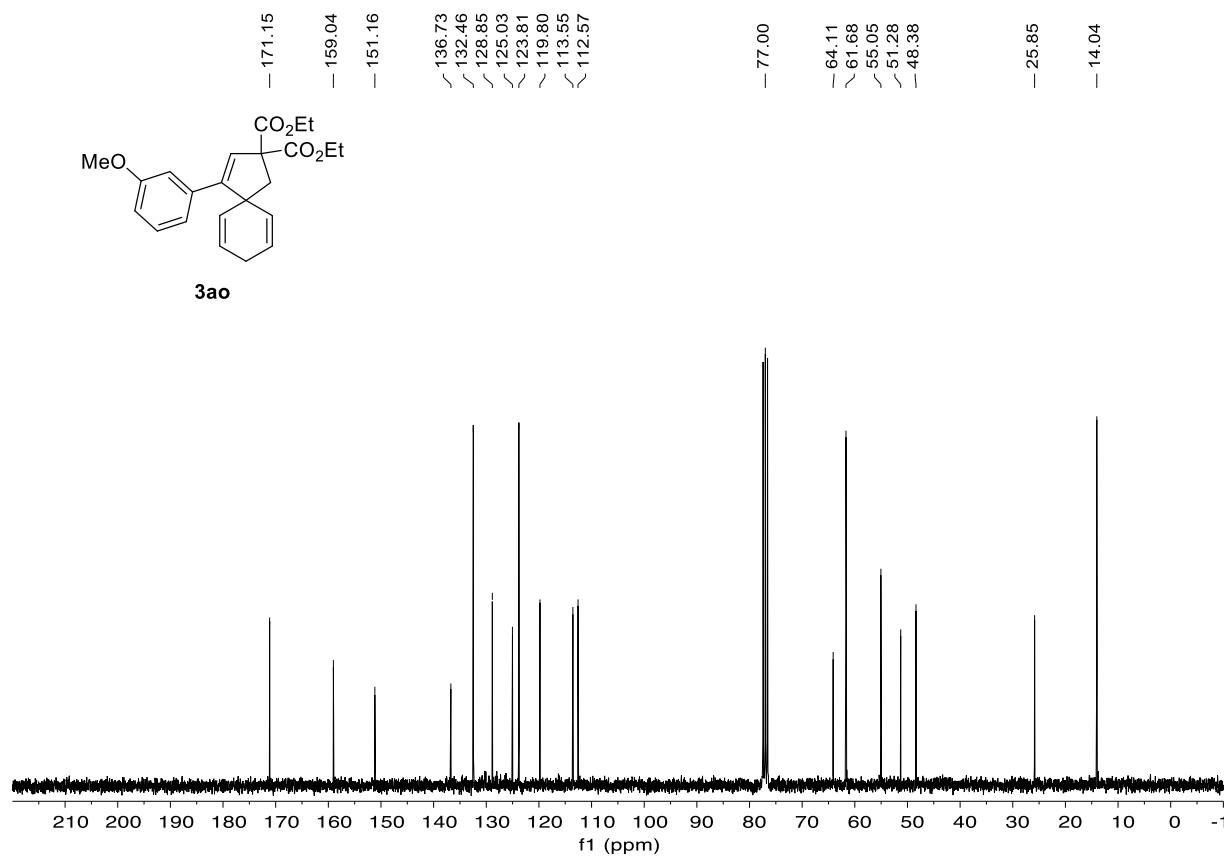

**<sup>1</sup>H NMR (300 MHz, CDCl<sub>3</sub>) and <sup>13</sup>C NMR (100 MHz, CDCl<sub>3</sub>) spectra of product 3ap**

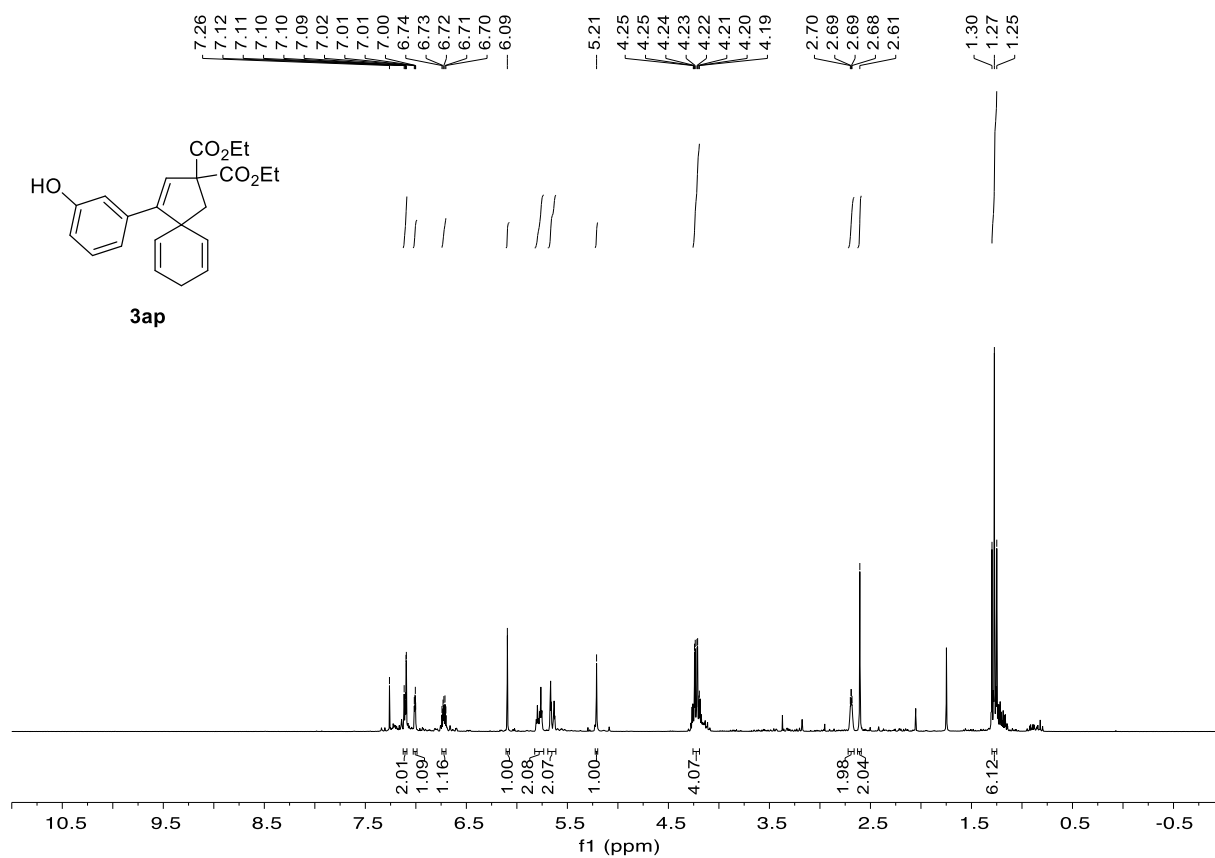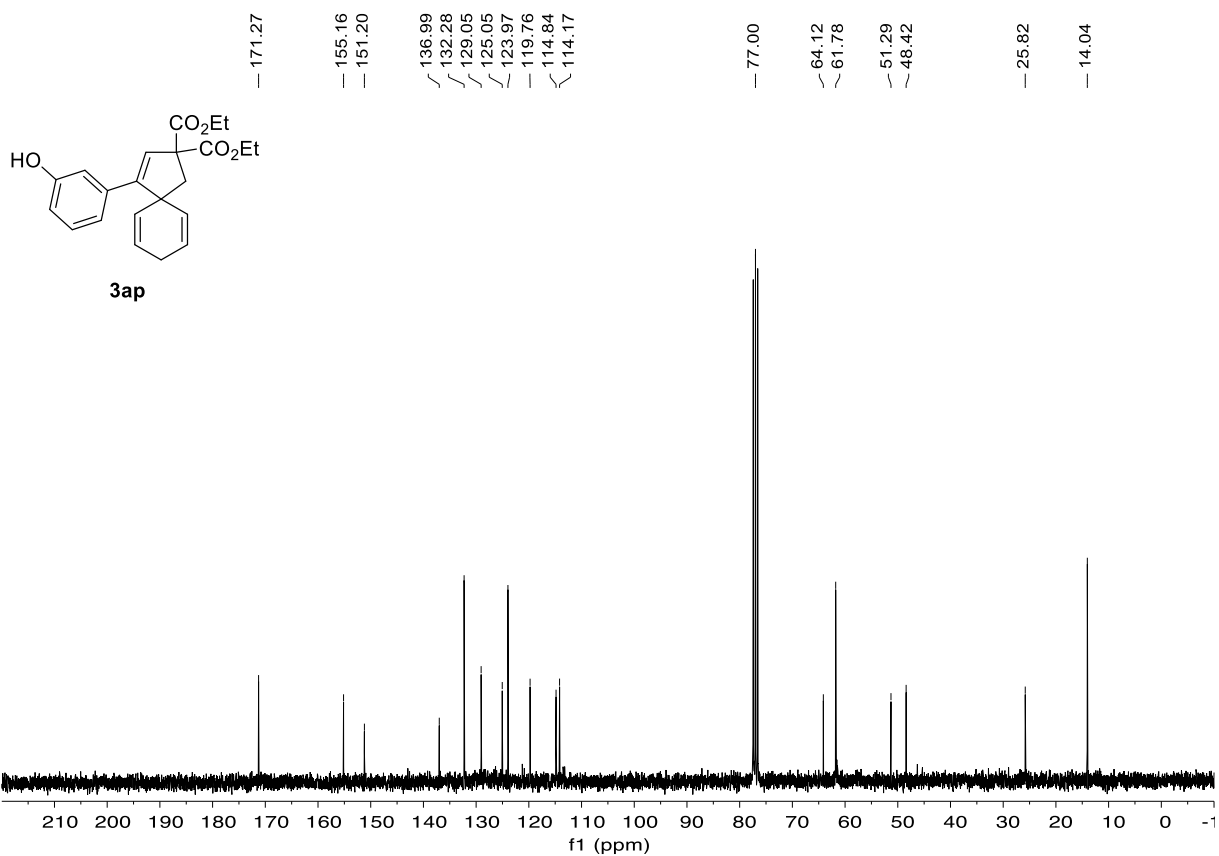

**<sup>1</sup>H NMR (400 MHz, CDCl<sub>3</sub>), <sup>13</sup>C NMR (100 MHz, CDCl<sub>3</sub>) and <sup>19</sup>F NMR (376 MHz, CDCl<sub>3</sub>) spectra of product 3aq**

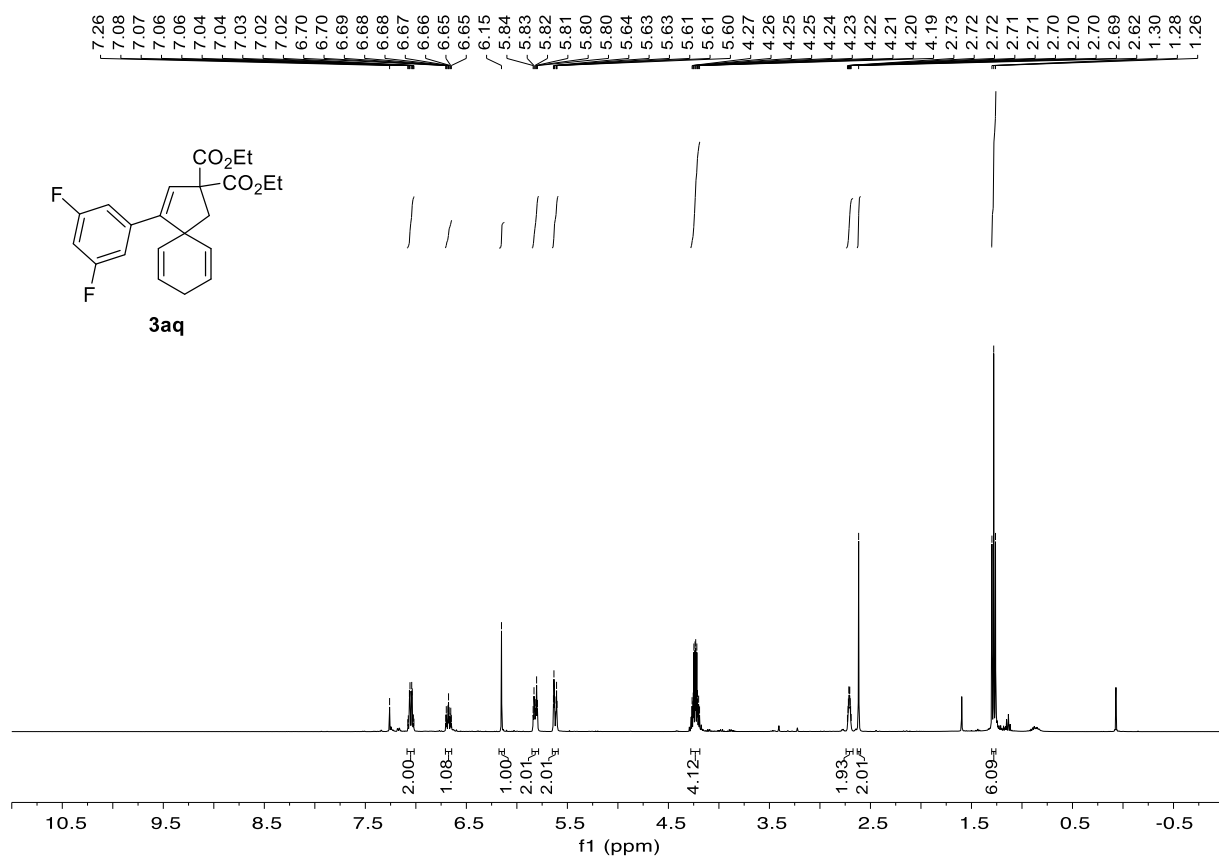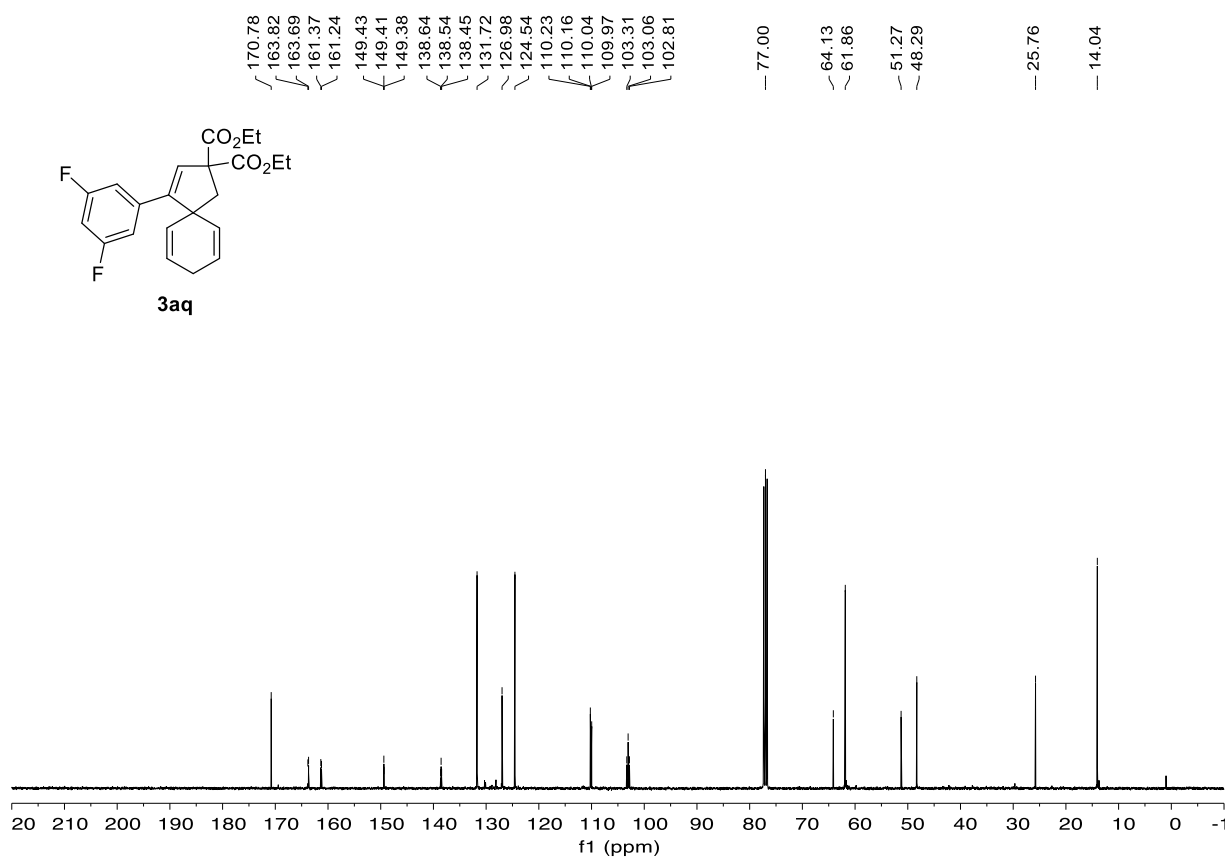



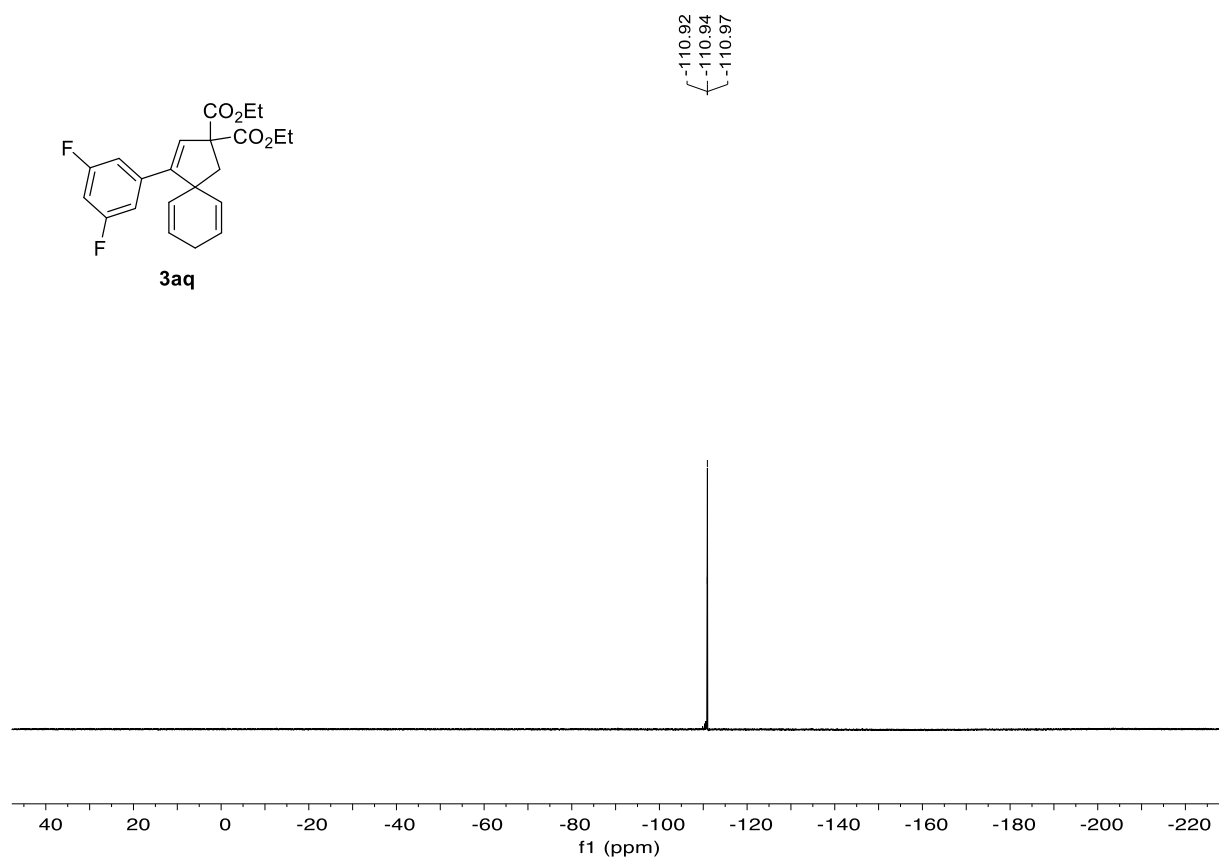

<sup>1</sup>H NMR (300 MHz, CDCl<sub>3</sub>), and <sup>13</sup>C NMR (75 MHz, CDCl<sub>3</sub>) spectra of product **3ar**

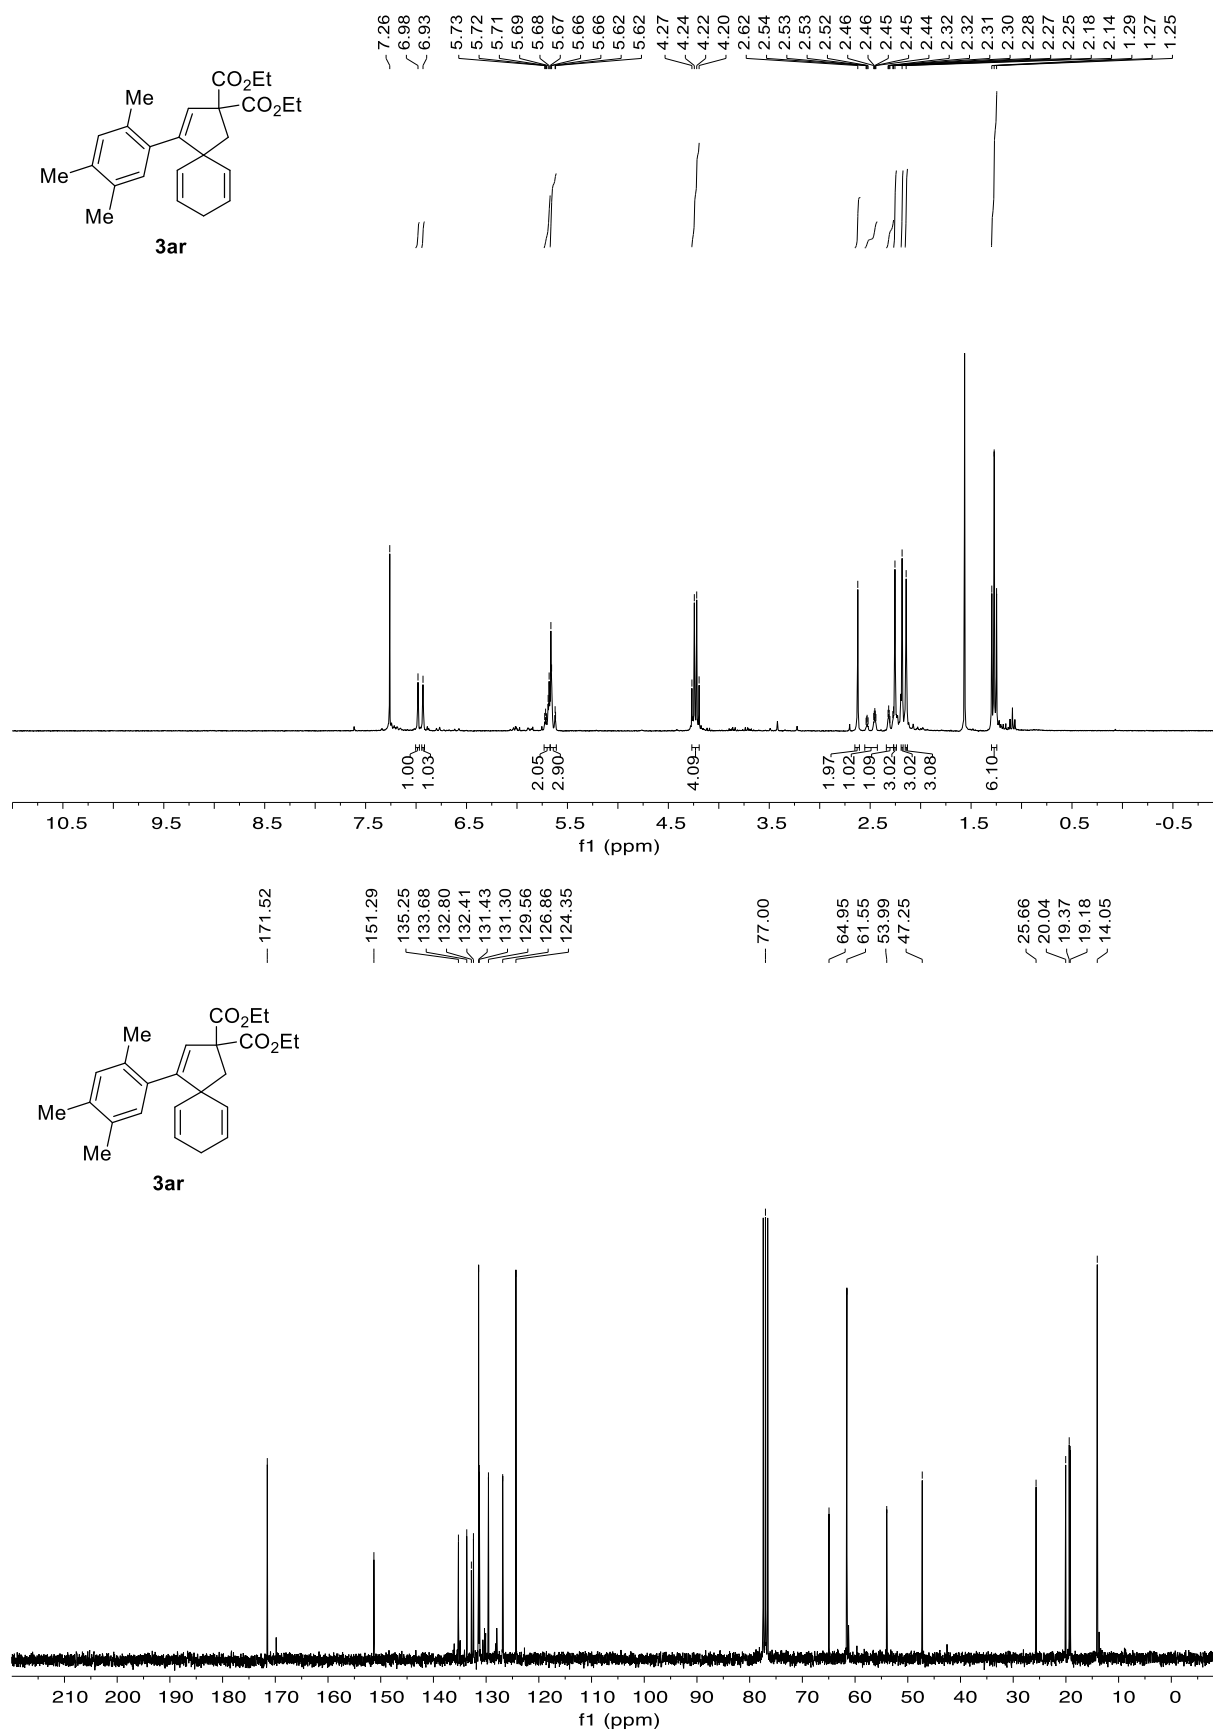

**<sup>1</sup>H NMR (300 MHz, CDCl<sub>3</sub>), and <sup>13</sup>C NMR (75 MHz, CDCl<sub>3</sub>) spectra of product 3as**

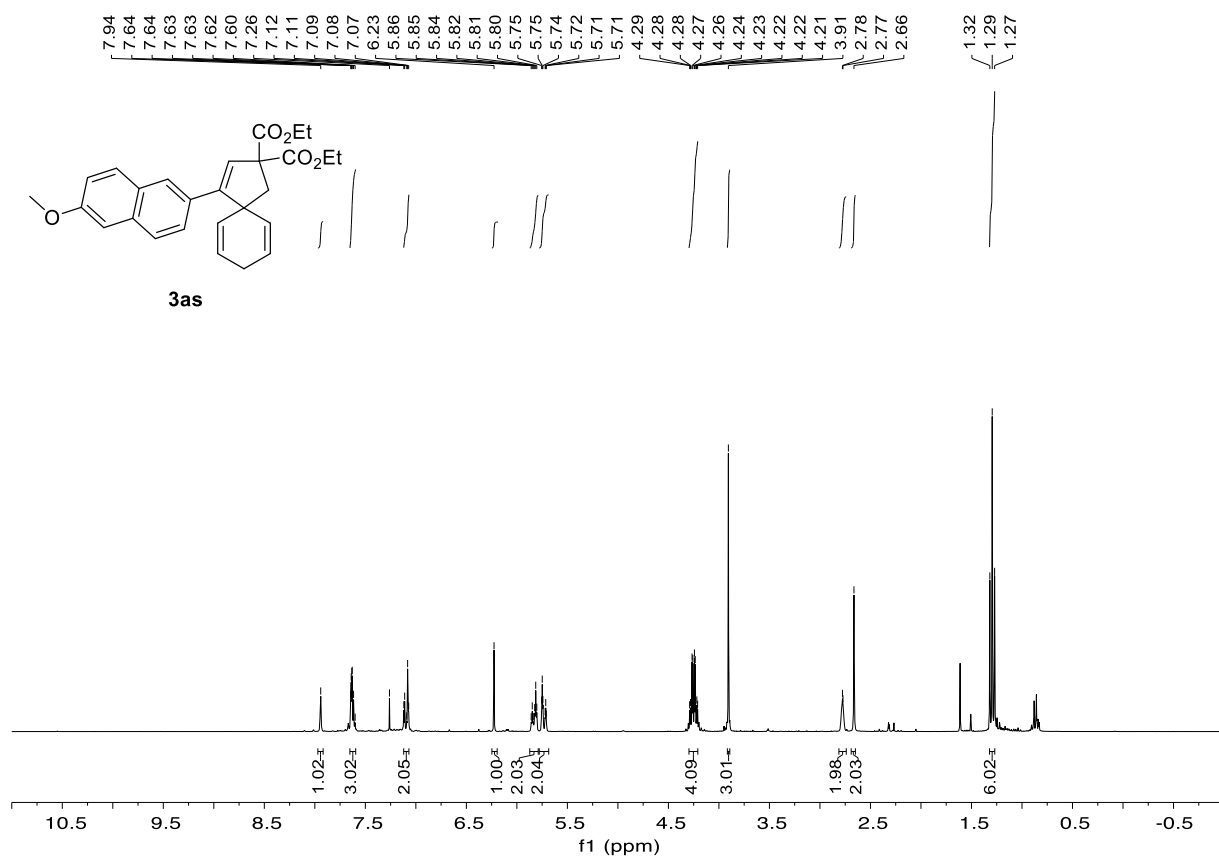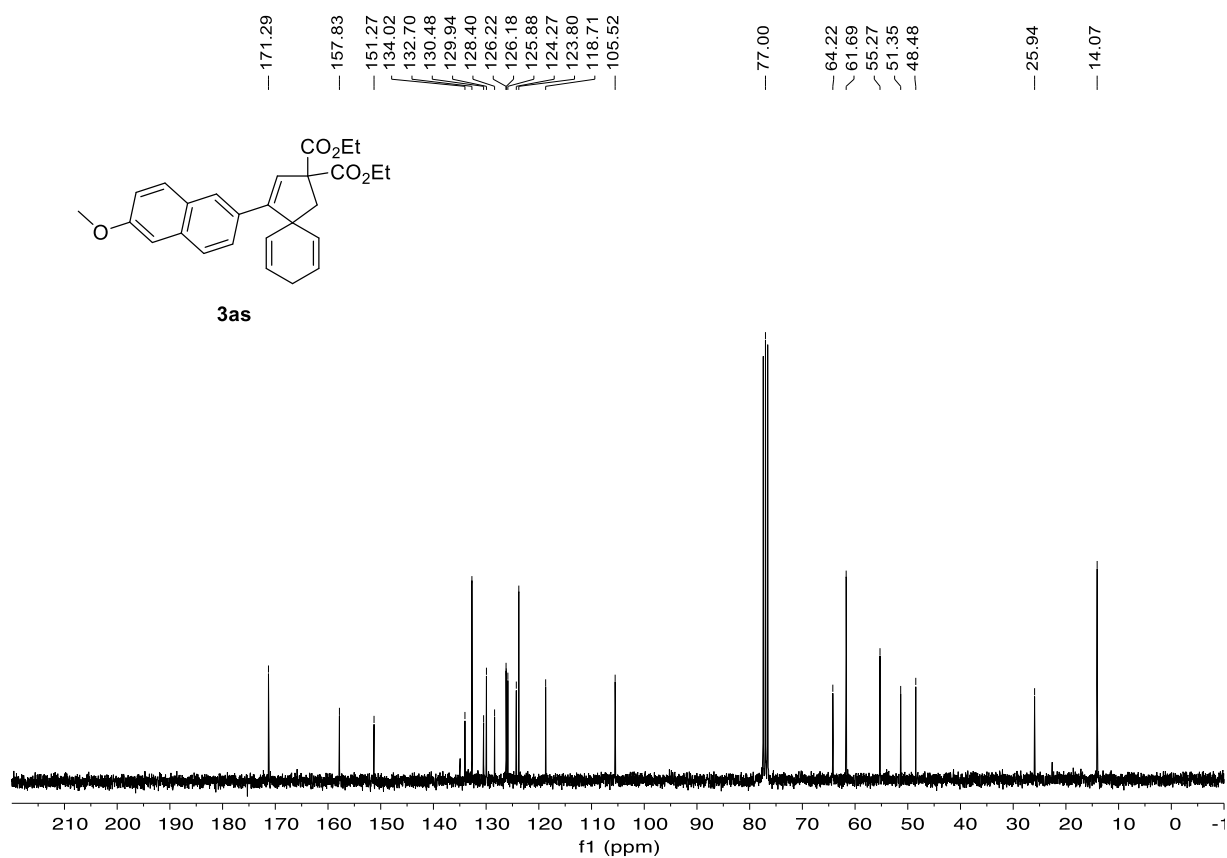

**<sup>1</sup>H NMR (300 MHz, CDCl<sub>3</sub>), and <sup>13</sup>C NMR (75 MHz, CDCl<sub>3</sub>) spectra of product 3at**

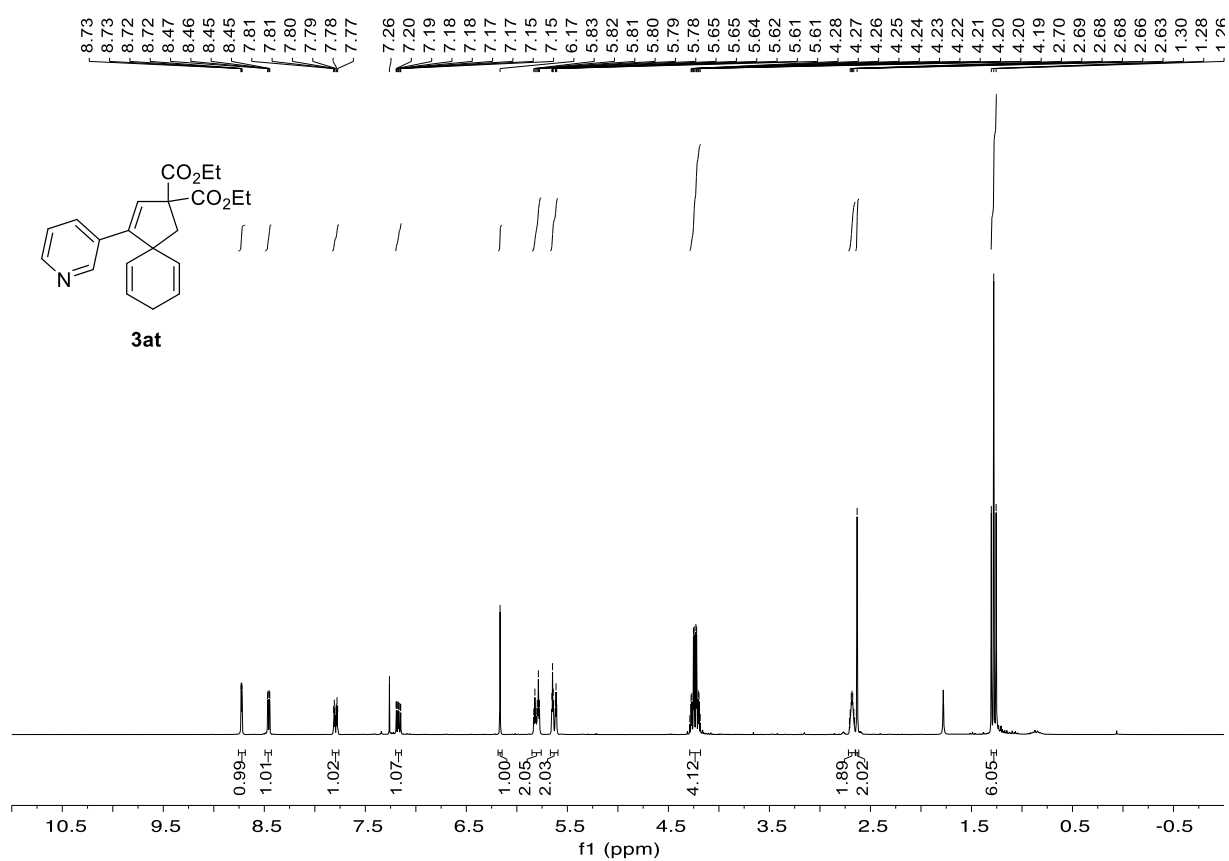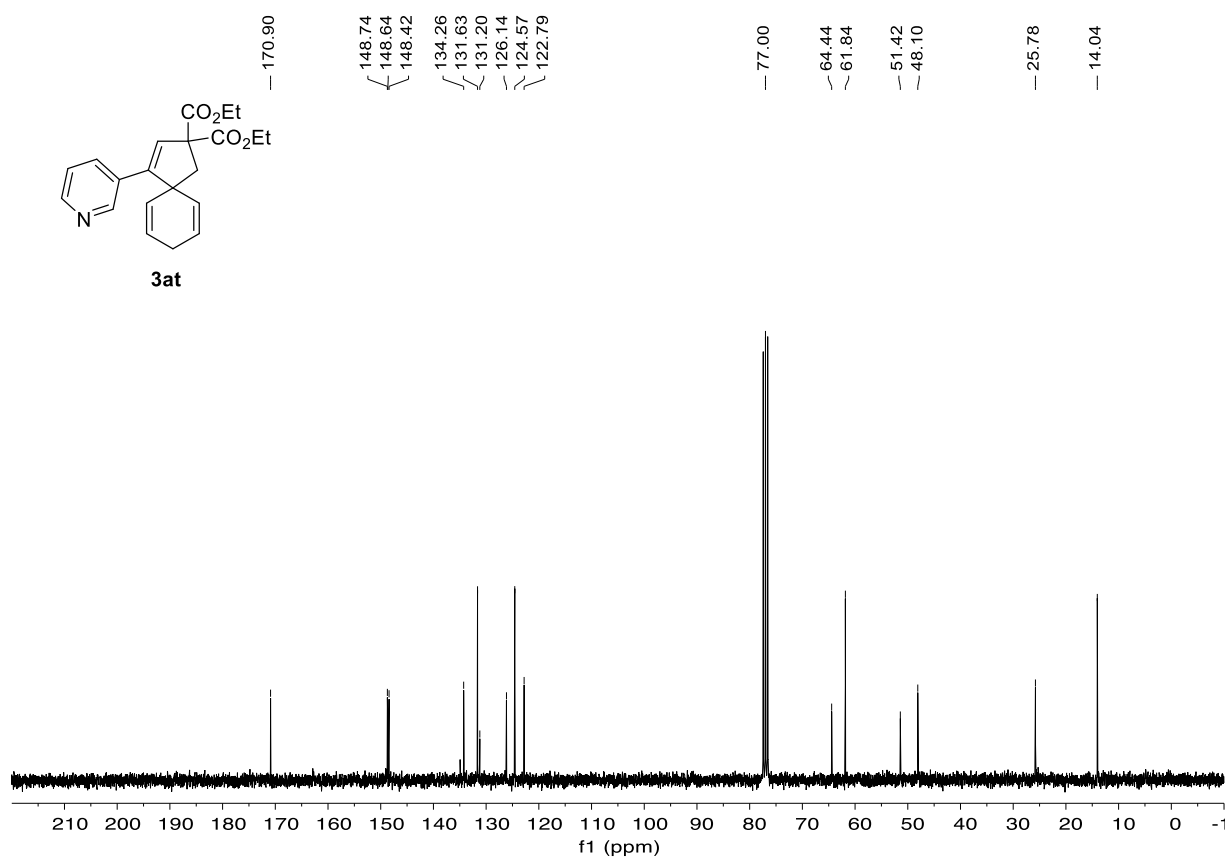

**<sup>1</sup>H NMR (300 MHz, CDCl<sub>3</sub>), and <sup>13</sup>C NMR (75 MHz, CDCl<sub>3</sub>) spectra of product 3au**

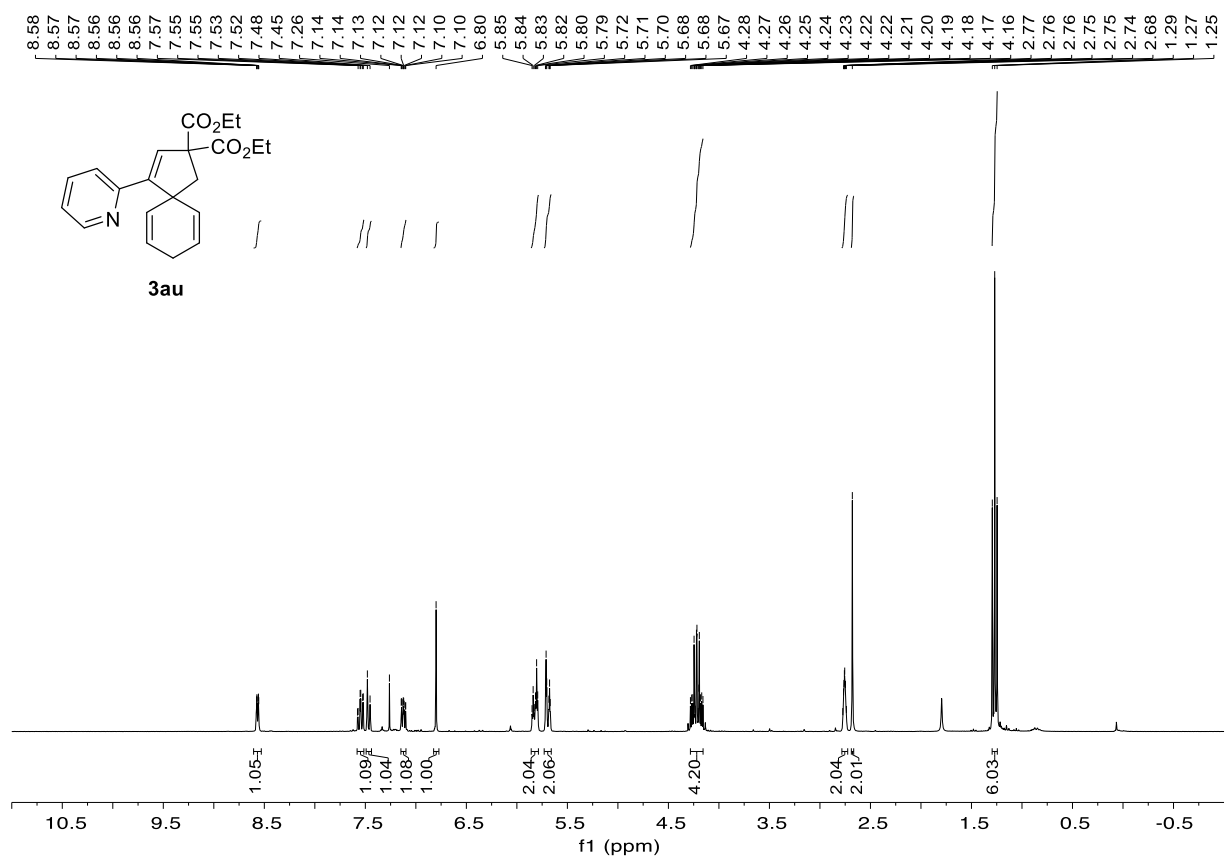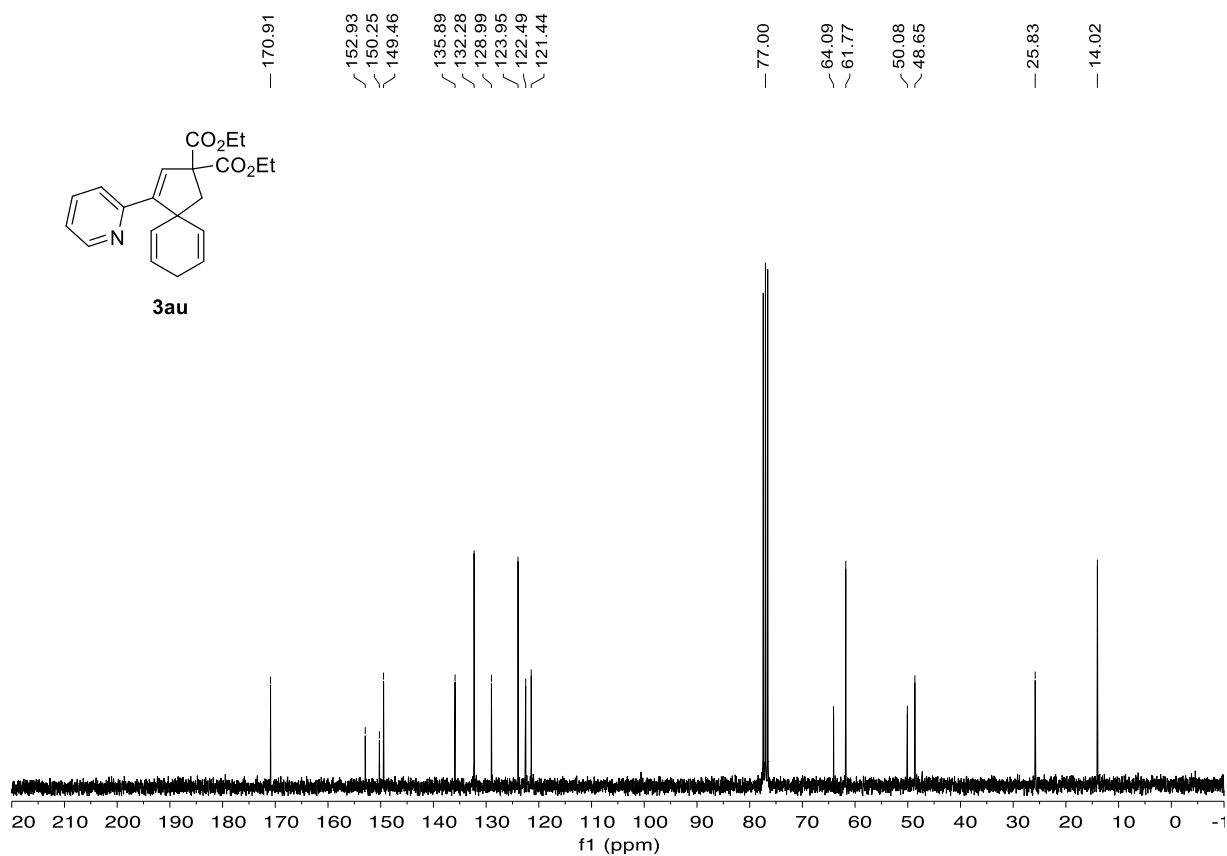

**<sup>1</sup>H NMR (300 MHz, CDCl<sub>3</sub>), and <sup>13</sup>C NMR (75 MHz, CDCl<sub>3</sub>) spectra of product 3av**

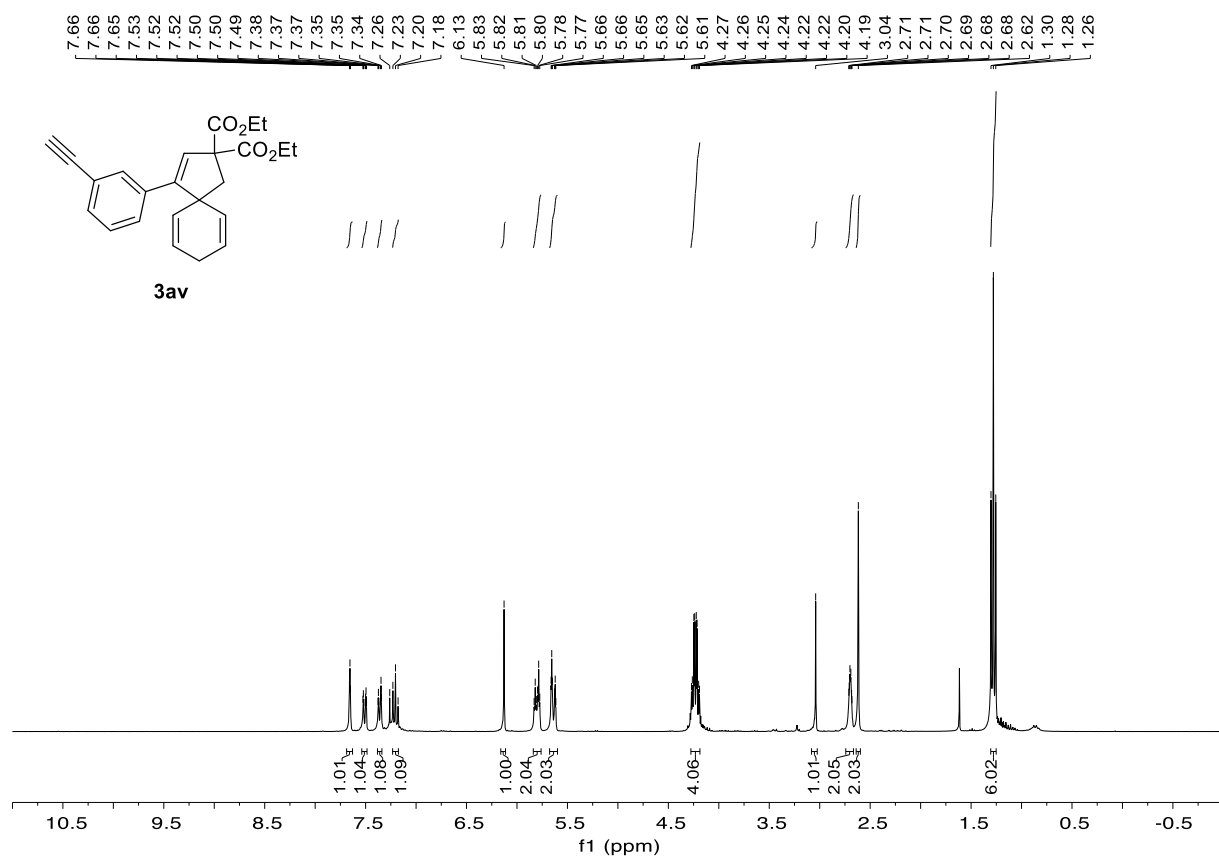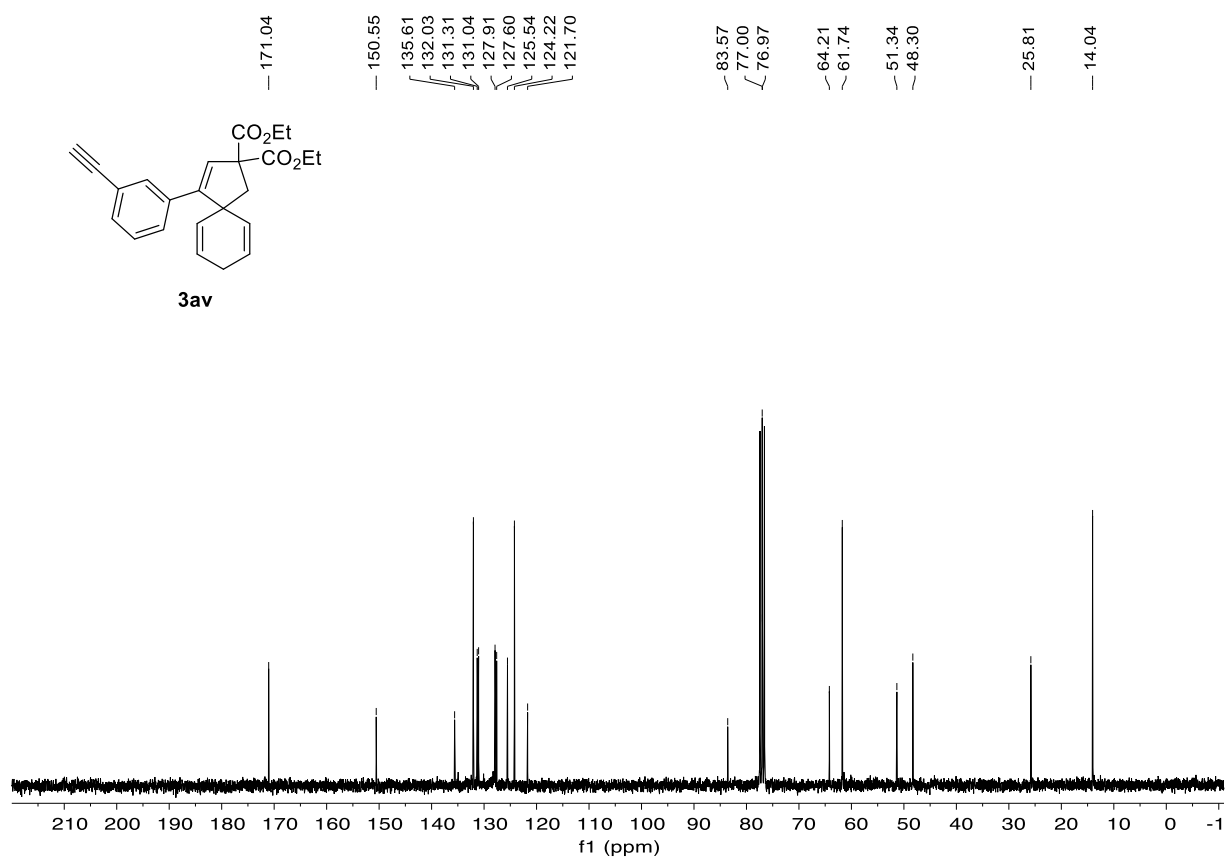

**<sup>1</sup>H NMR (300 MHz, CDCl<sub>3</sub>), and <sup>13</sup>C NMR (75 MHz, CDCl<sub>3</sub>) spectra of product 3av'**

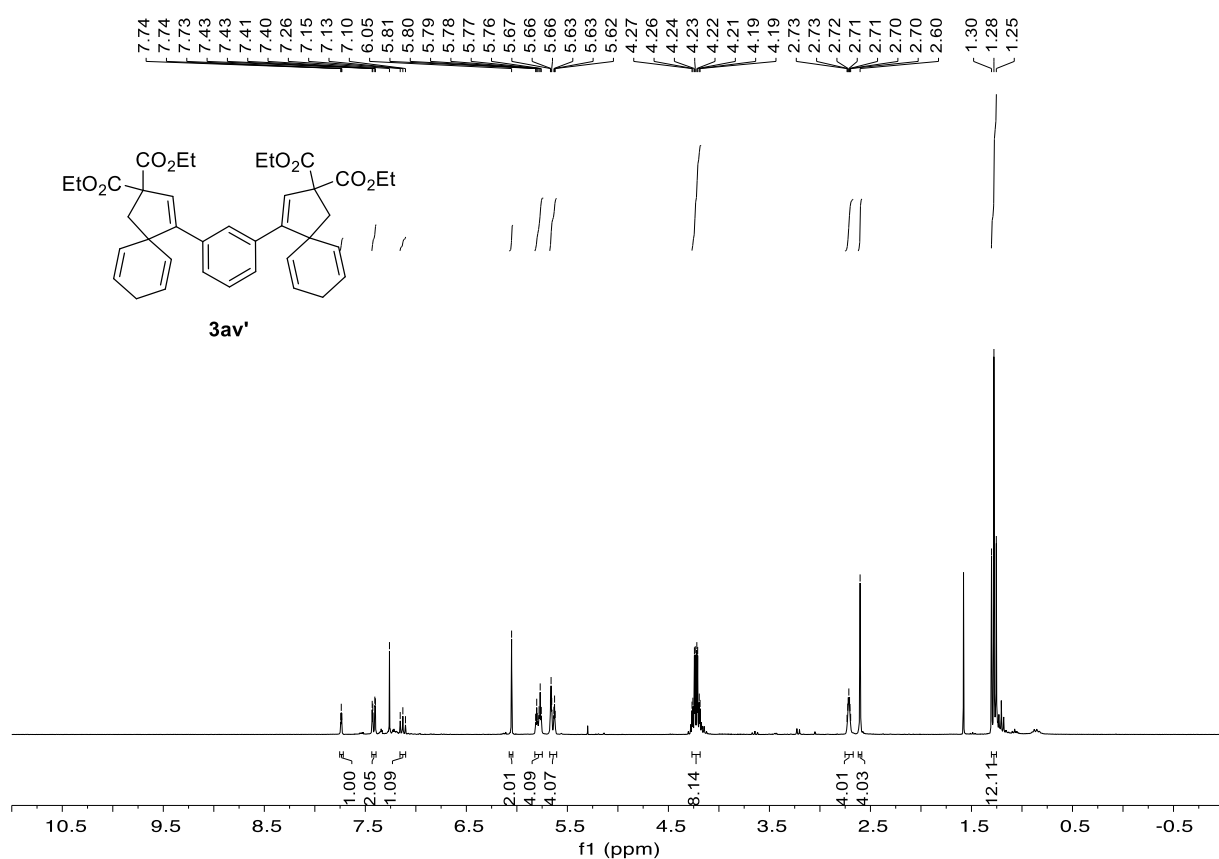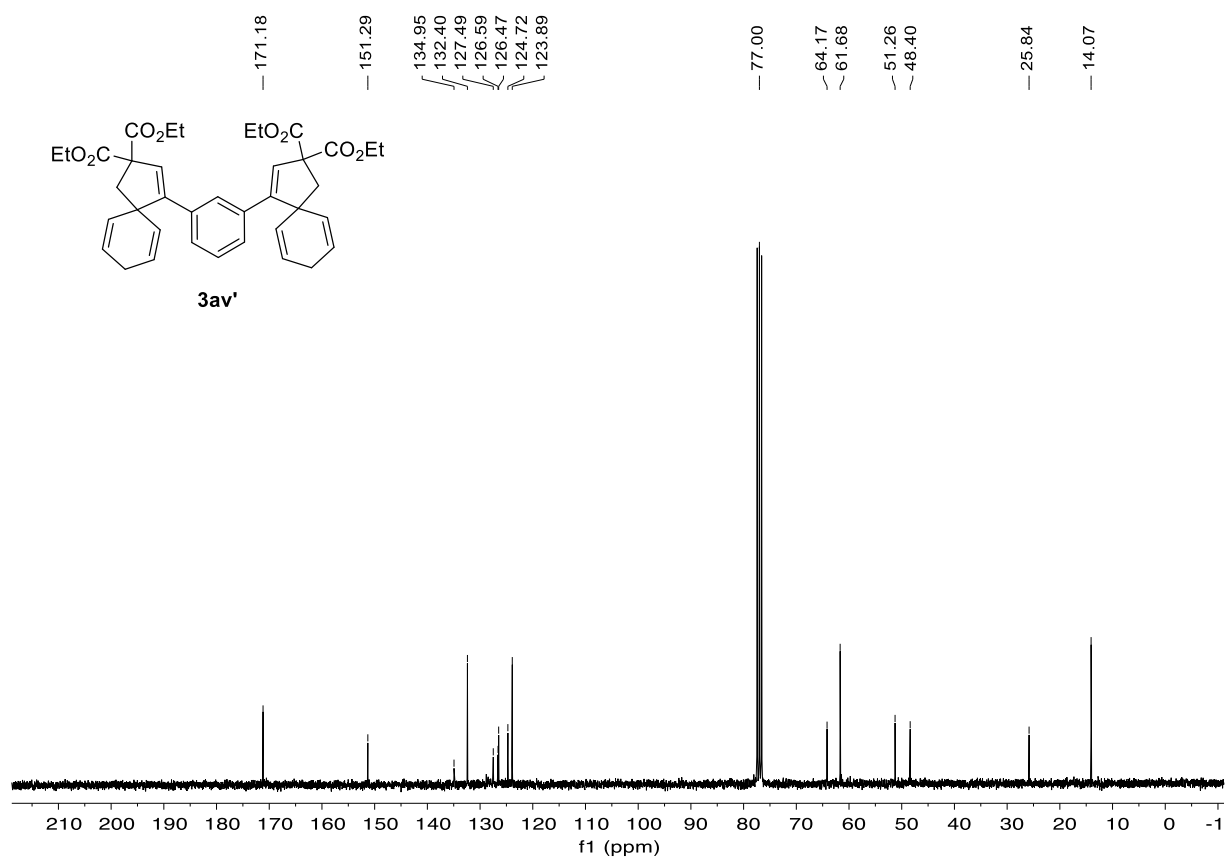

<sup>1</sup>H NMR (300 MHz, CDCl<sub>3</sub>), and <sup>13</sup>C NMR (75 MHz, CDCl<sub>3</sub>) spectra of product **3aw**

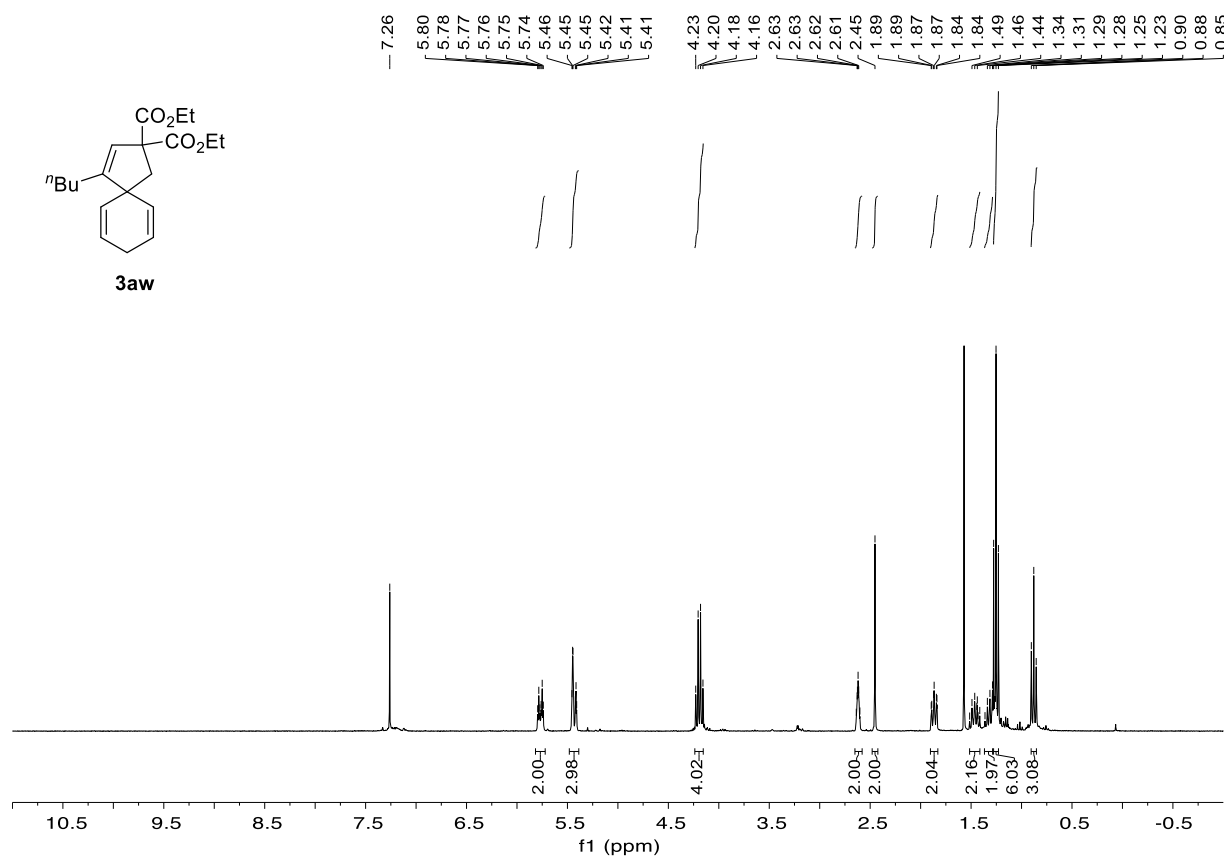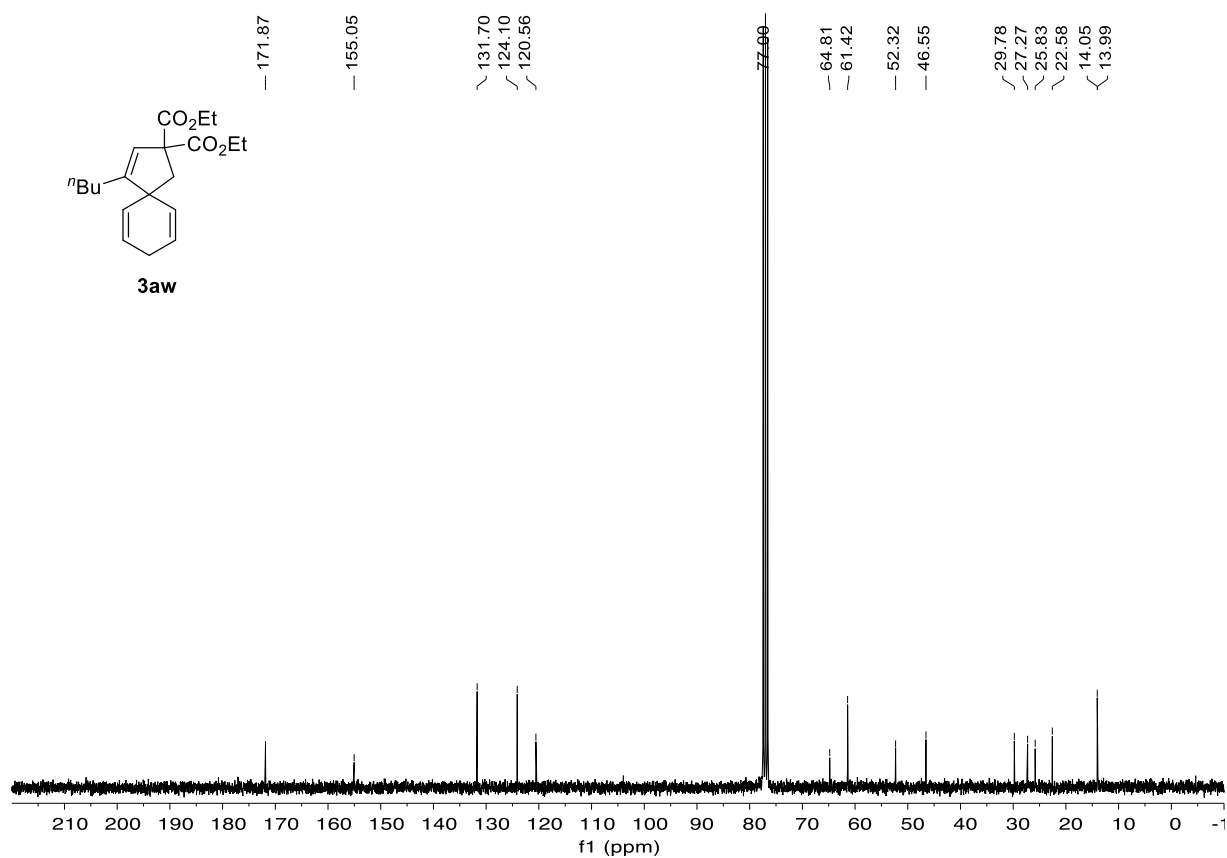



**$^1\text{H}$  NMR (300 MHz,  $\text{CDCl}_3$ ), and  $^{13}\text{C}$  NMR (75 MHz,  $\text{CDCl}_3$ ) spectra of product **3ax****

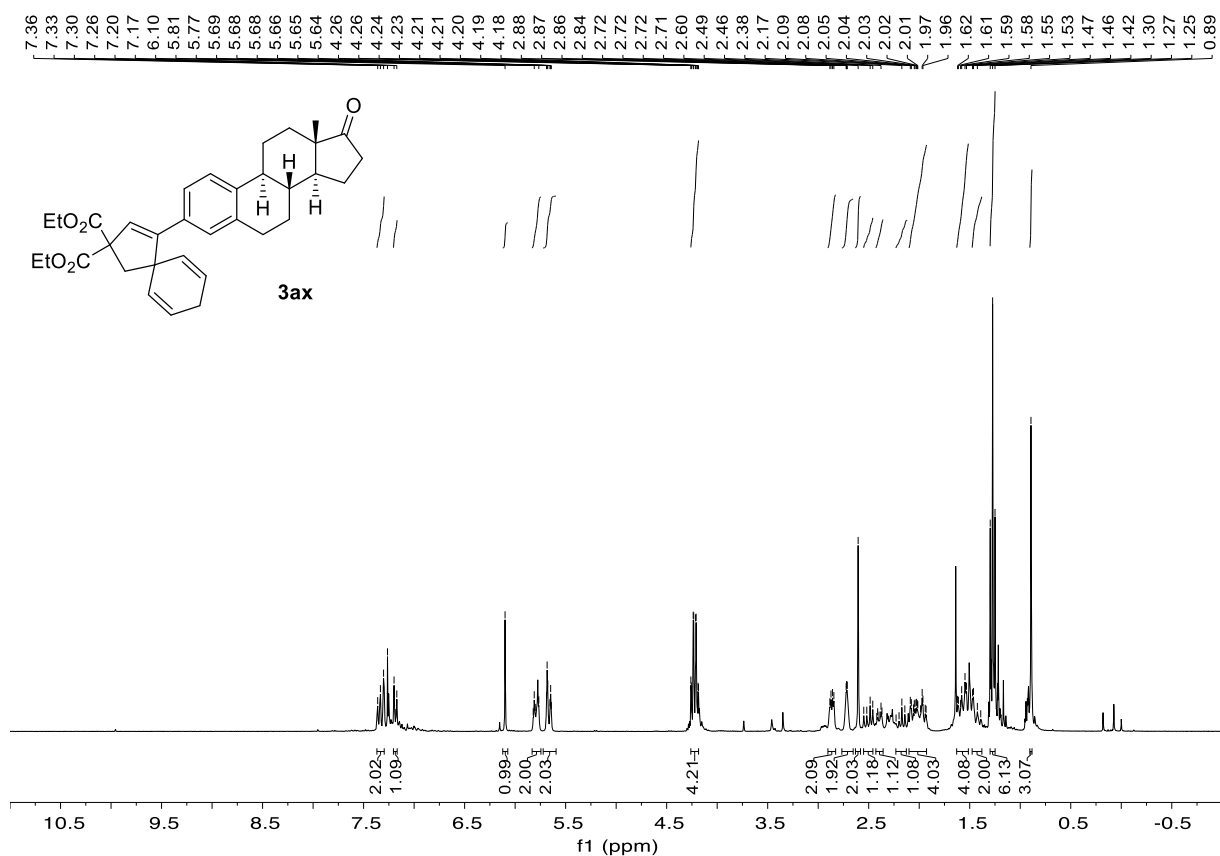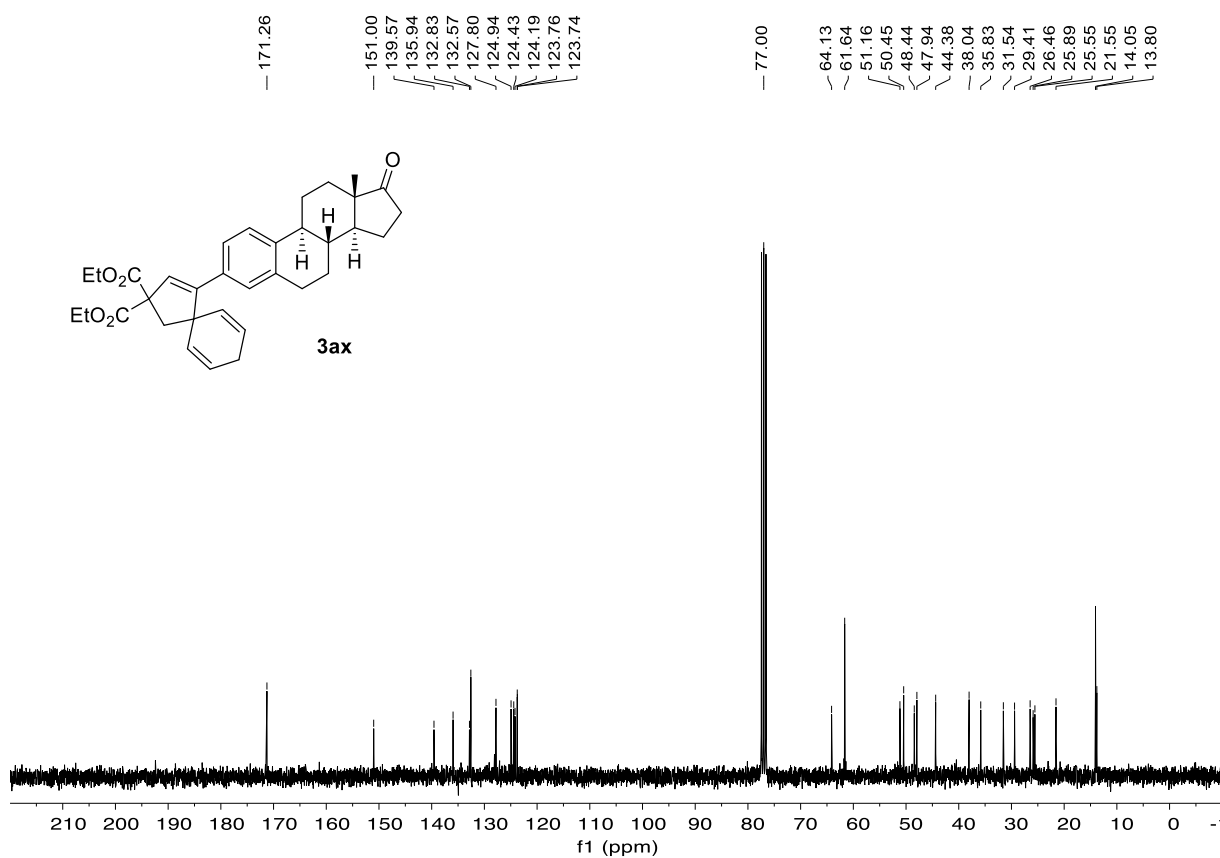

**<sup>1</sup>H NMR (300 MHz, CDCl<sub>3</sub>), and <sup>13</sup>C NMR (75 MHz, CDCl<sub>3</sub>) spectra of product 4**

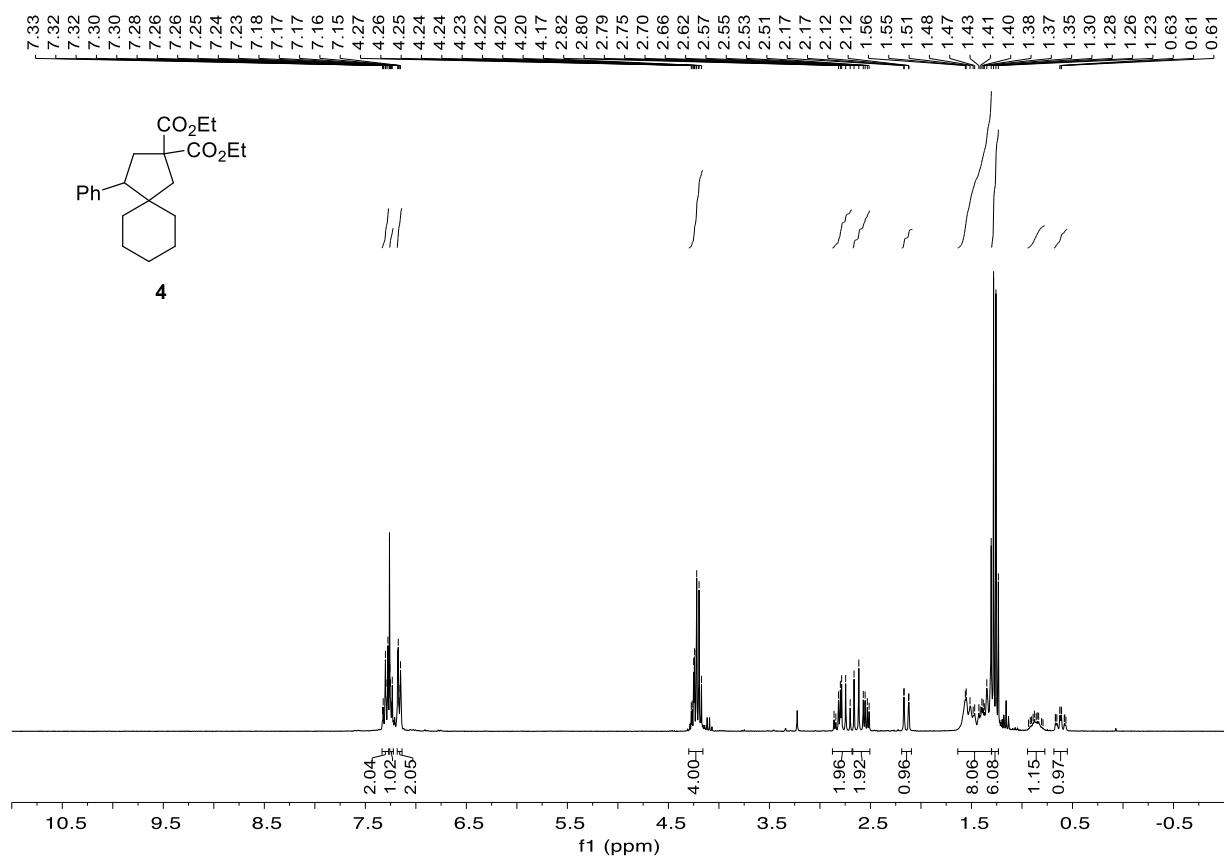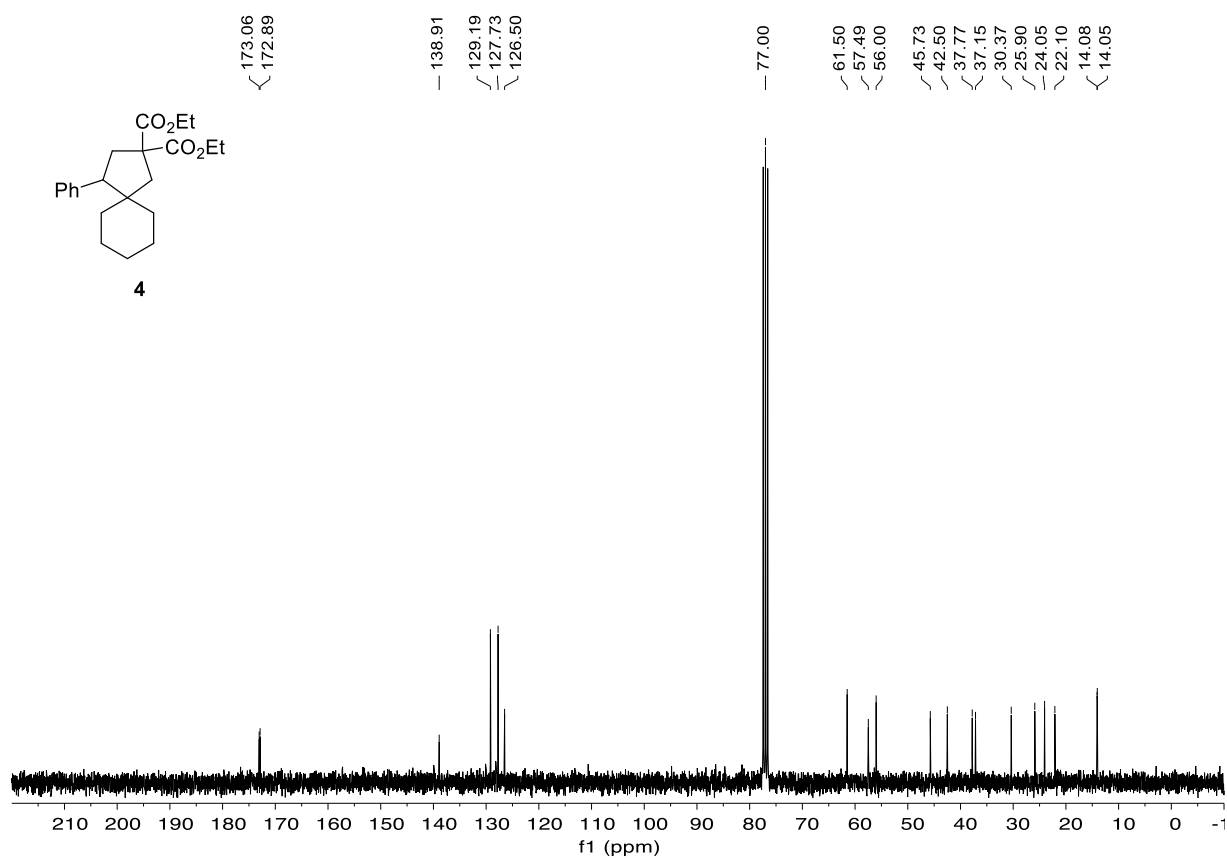

**<sup>1</sup>H NMR (300 MHz, CDCl<sub>3</sub>), and <sup>13</sup>C NMR (75 MHz, CDCl<sub>3</sub>) spectra of product 5**

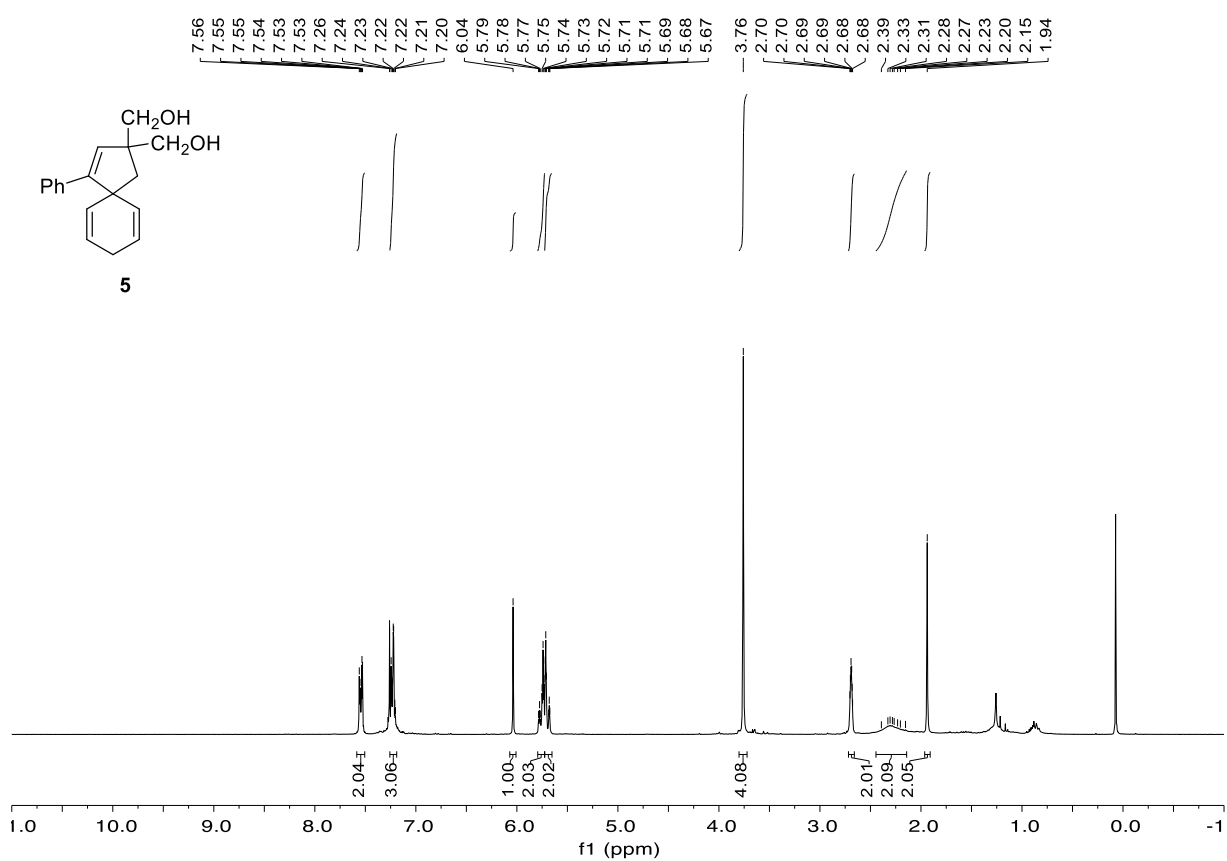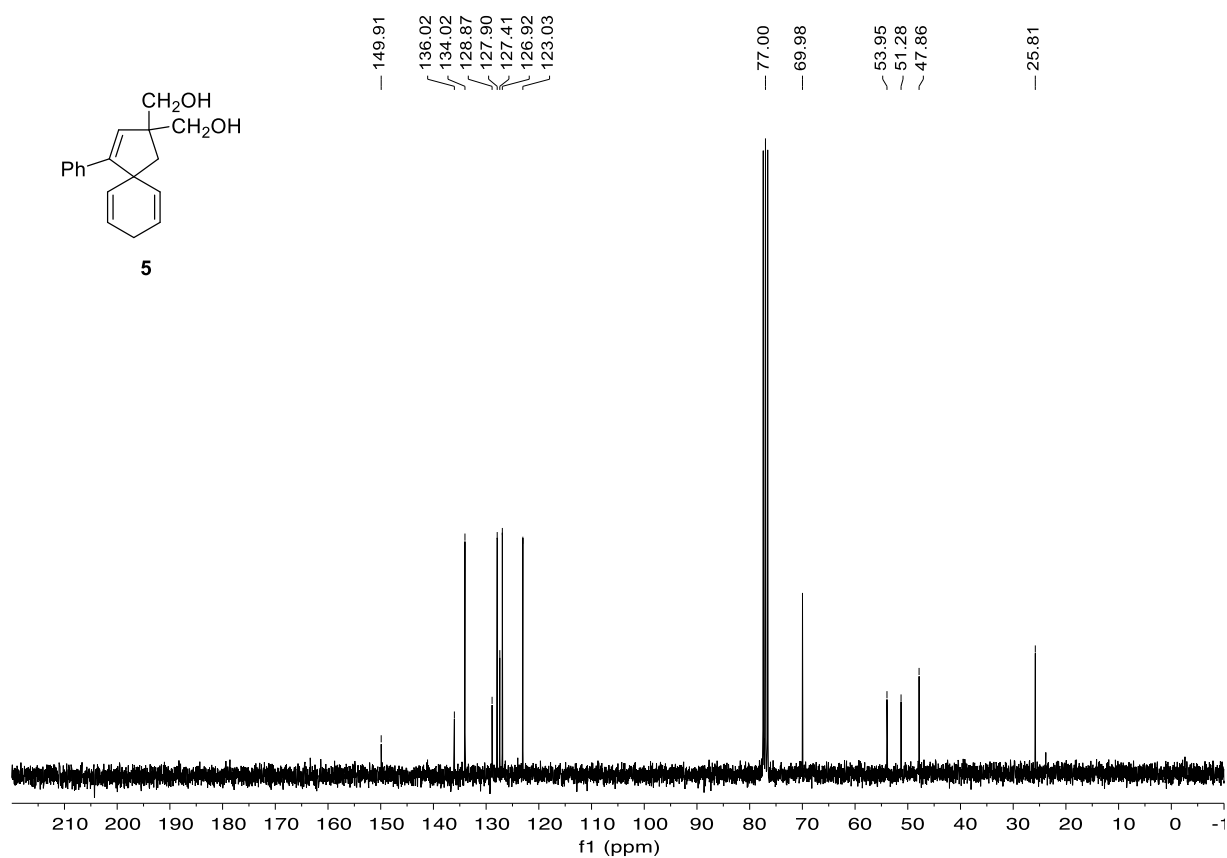

**<sup>1</sup>H NMR (300 MHz, CDCl<sub>3</sub>), and <sup>13</sup>C NMR (75 MHz, CDCl<sub>3</sub>) spectra of product 6**

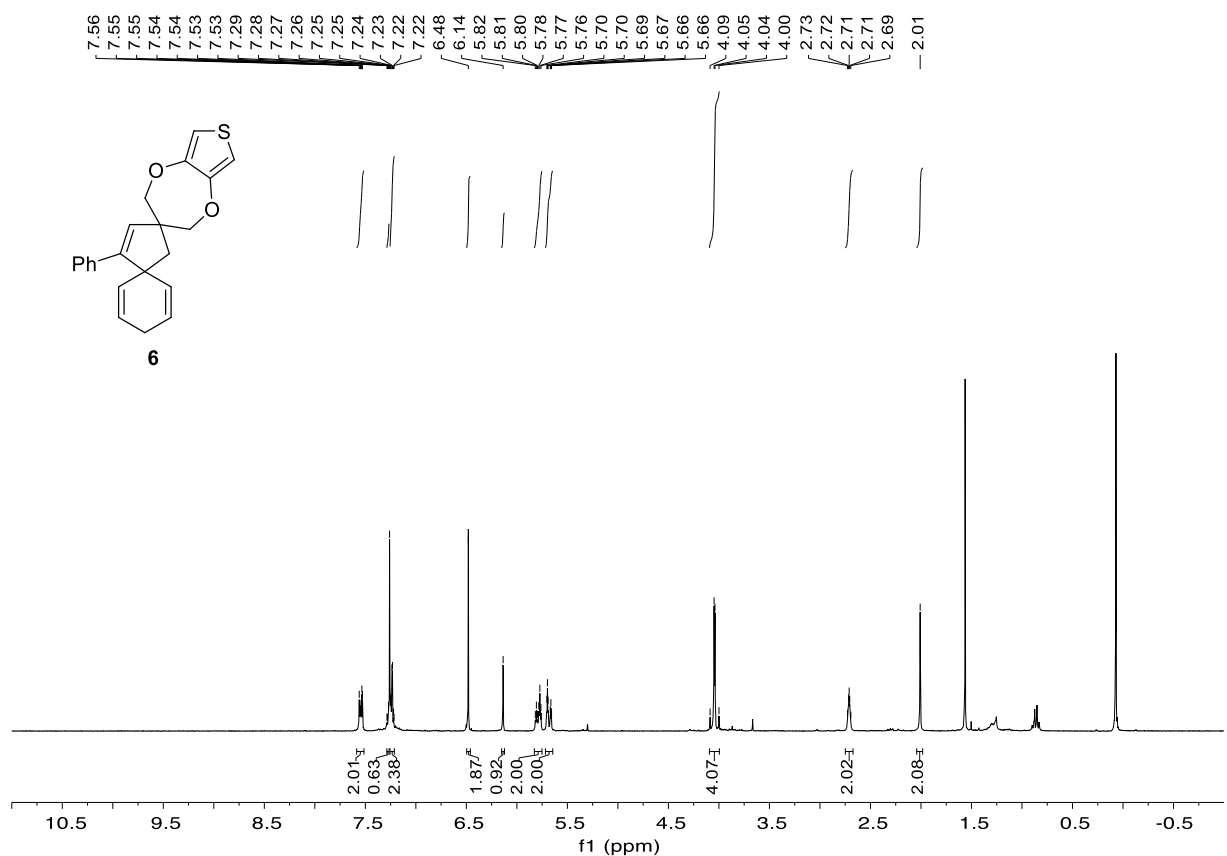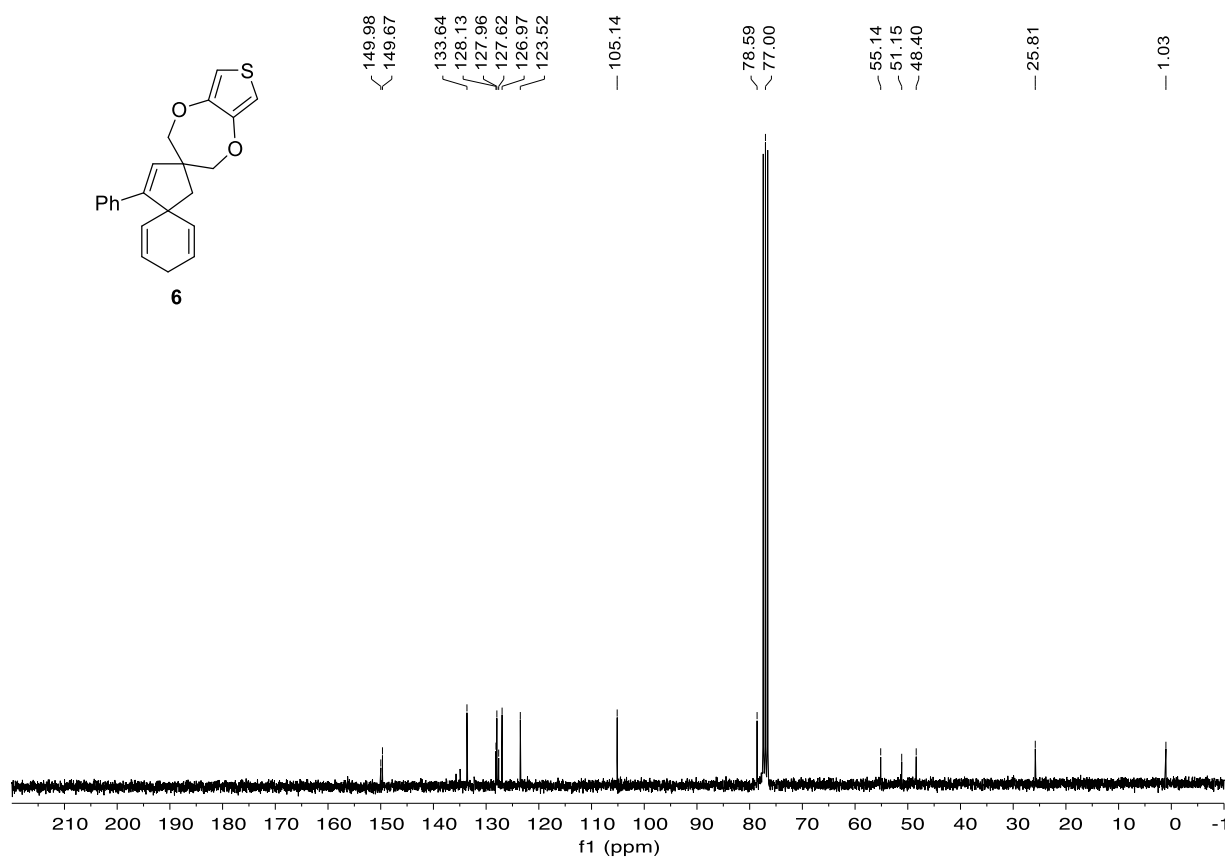

**<sup>1</sup>H NMR (400 MHz, CDCl<sub>3</sub>), and <sup>13</sup>C NMR (75 MHz, CDCl<sub>3</sub>) spectra of product 7**

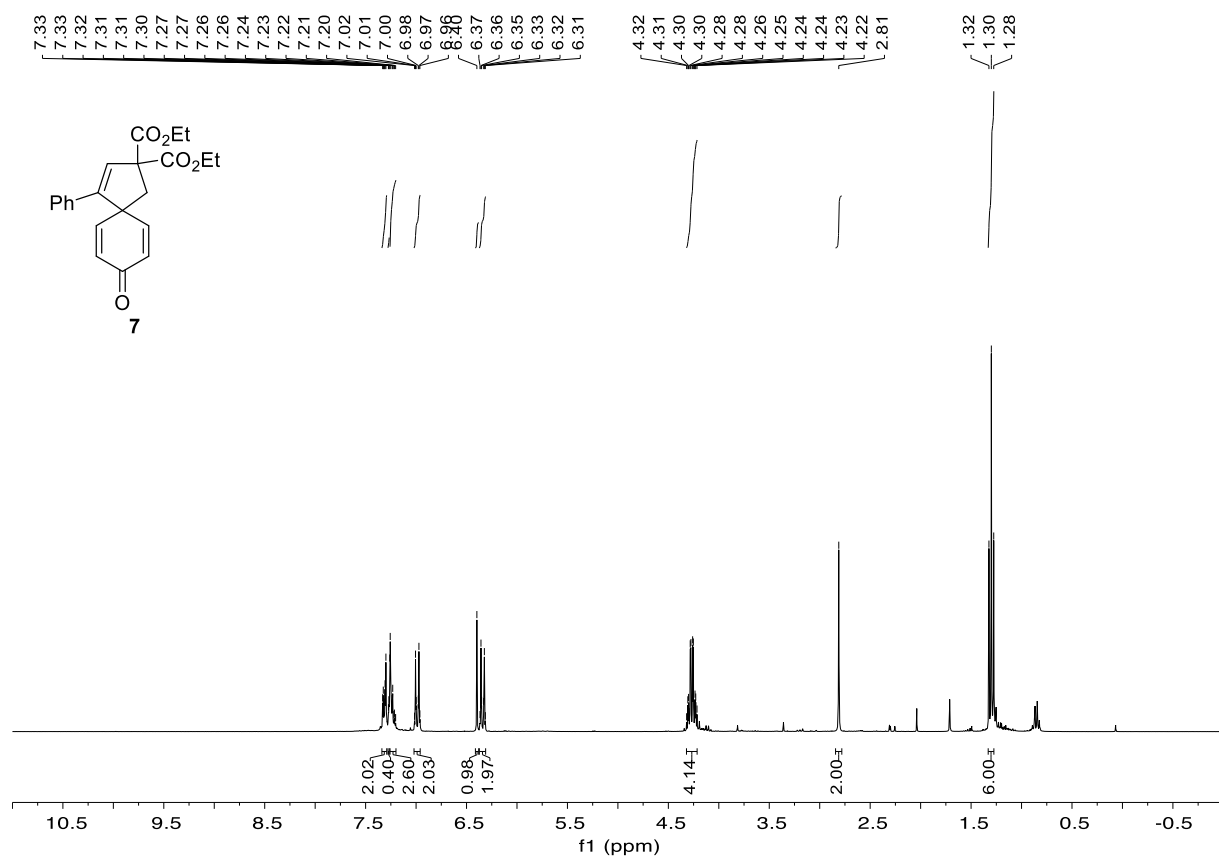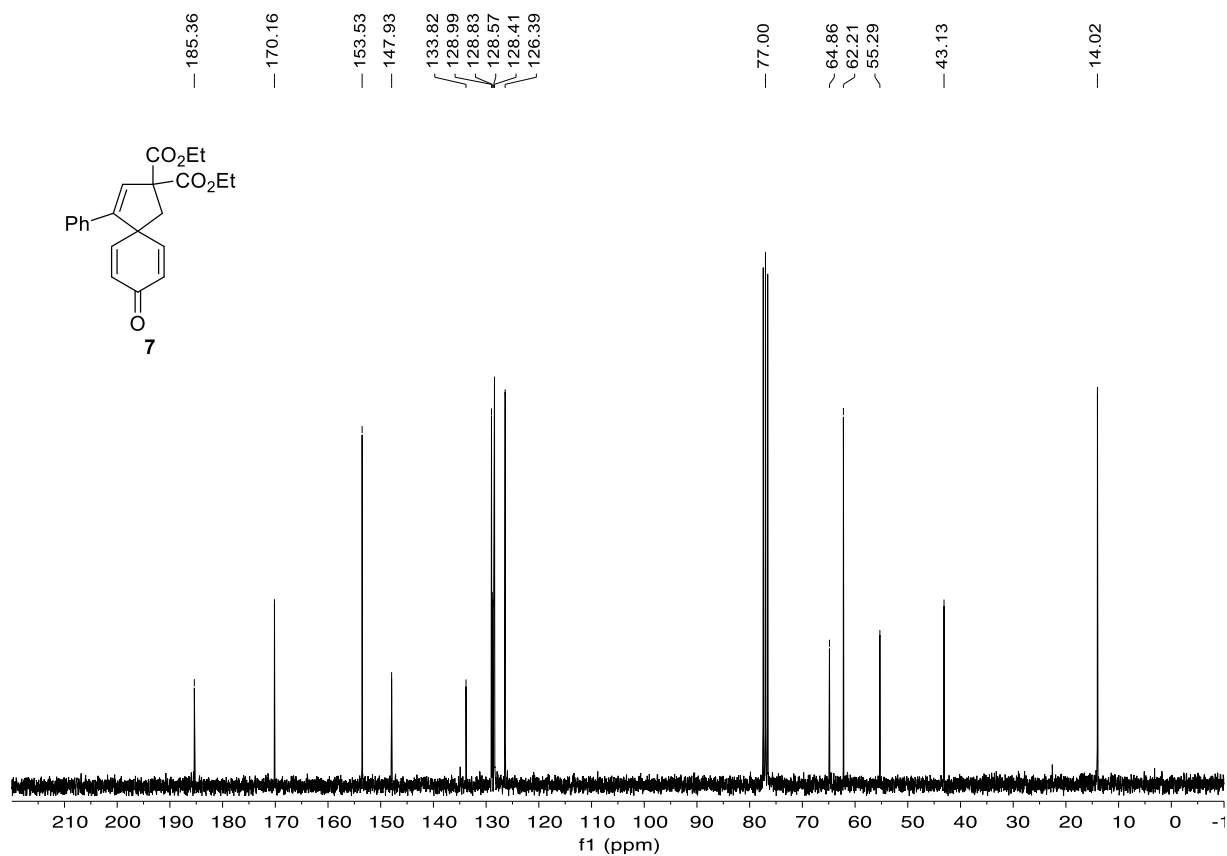

**$^1\text{H}$  NMR (300 MHz,  $\text{CDCl}_3$ ), and  $^{13}\text{C}$  NMR (75 MHz,  $\text{CDCl}_3$ ) spectra of product 9**

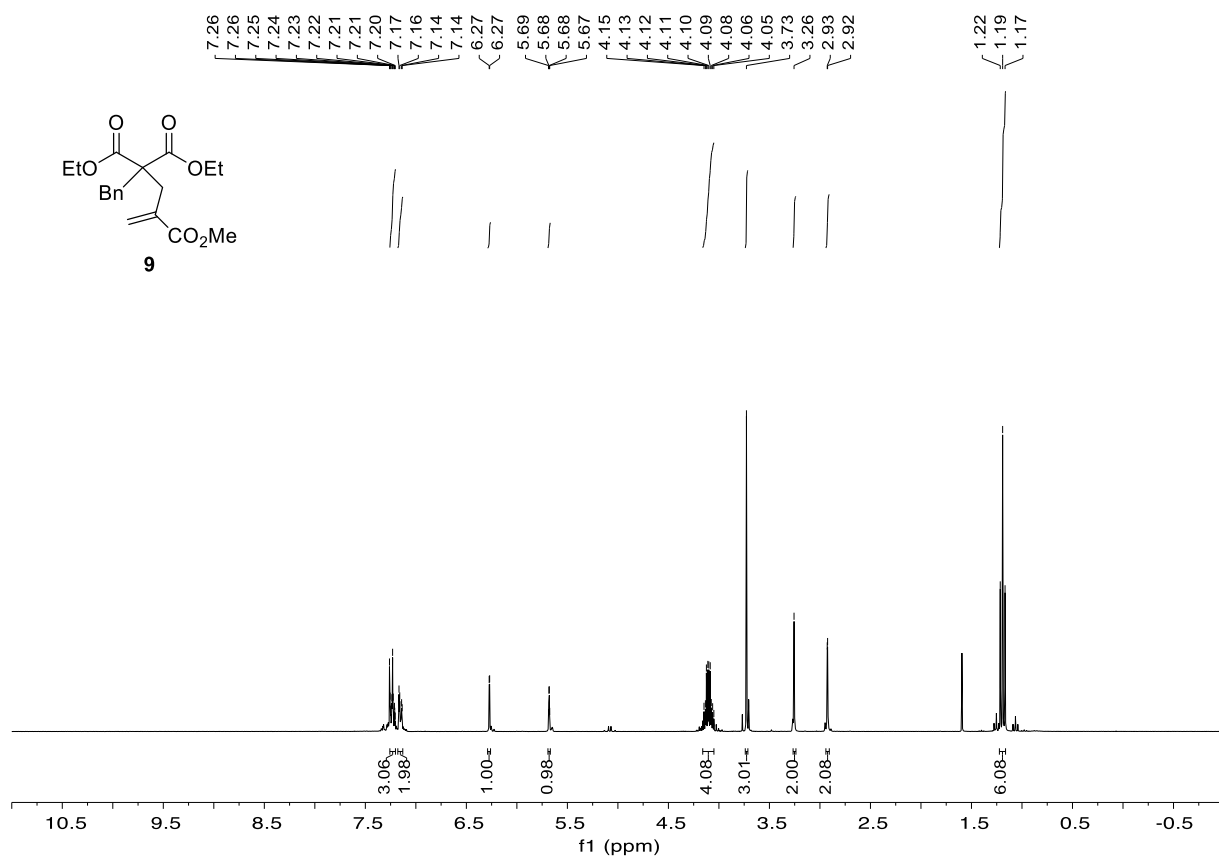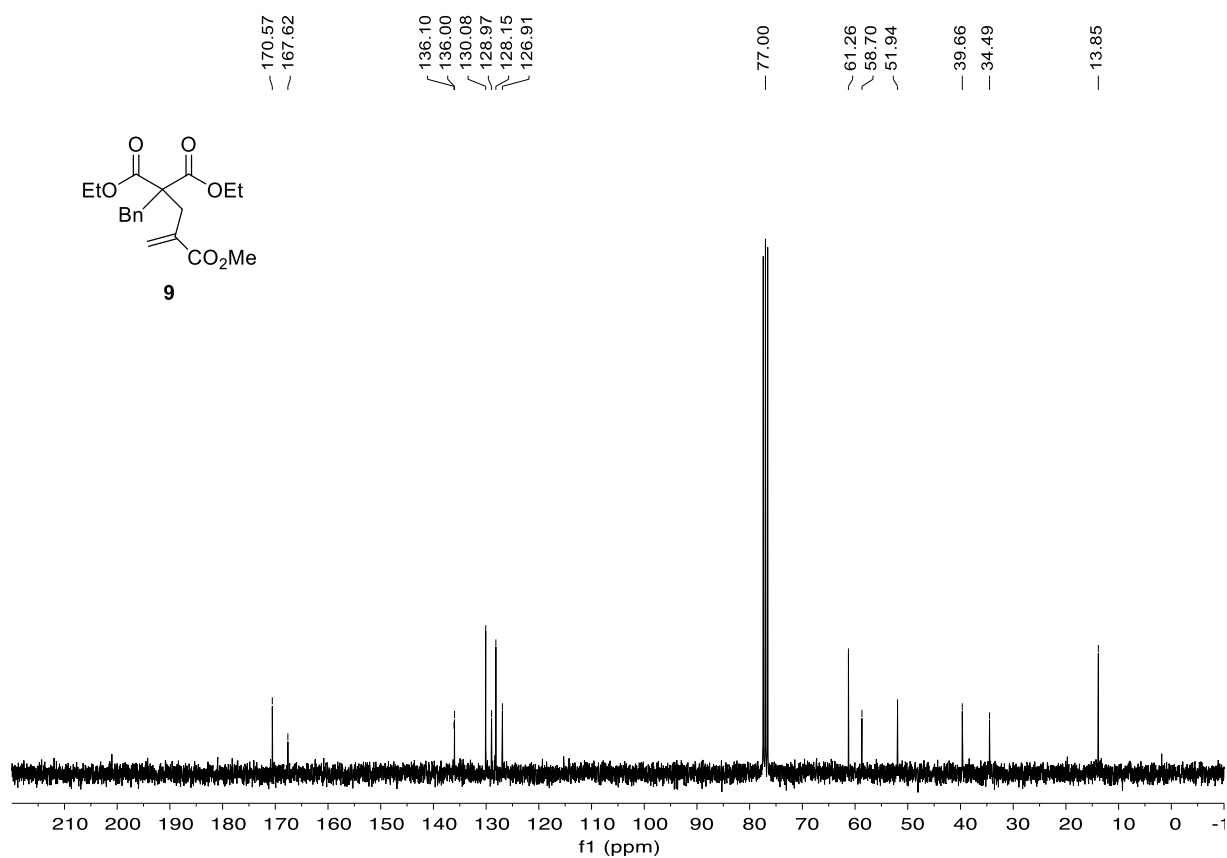

Supplement: d1gc04686a1.pdf [file d1gc04686a1.pdf]
